# Supplementary material for: Introducing physically active lessons in UK secondary schools: feasibility study and pilot cluster-randomised controlled trial
Source: PubMed Central journal article supplement — BMJ Open. 2019 May 6;9(5):e025080. doi: 10.1136/bmjopen-2018-025080 (PMC6527971; doi:10.1136/bmjopen-2018-025080), 2019-05-06
Supplement: bmjopen-2018-025080.draft_revisions.pdf [file bmjopen-2018-025080.draft_revisions.pdf]

# BMJ Open

BMJ Open is committed to open peer review. As part of this commitment we make the peer review history of every article we publish publicly available.

When an article is published we post the peer reviewers' comments and the authors' responses online. We also post the versions of the paper that were used during peer review. These are the versions that the peer review comments apply to.

The versions of the paper that follow are the versions that were submitted during the peer review process. They are not the versions of record or the final published versions. They should not be cited or distributed as the published version of this manuscript.

BMJ Open is an open access journal and the full, final, typeset and author-corrected version of record of the manuscript is available on our site with no access controls, subscription charges or pay-per-view fees (<http://bmjopen.bmj.com>).

If you have any questions on BMJ Open's open peer review process please email [info.bmjopen@bmj.com](mailto:info.bmjopen@bmj.com)

# BMJ Open

## Introducing physically active lessons in UK secondary schools: feasibility study and pilot cluster-randomised controlled trial

|                               |                                                                                                                                                                                                                                                                                                                                                                                                                                                                                                                                                                                                                                                           |
|-------------------------------|-----------------------------------------------------------------------------------------------------------------------------------------------------------------------------------------------------------------------------------------------------------------------------------------------------------------------------------------------------------------------------------------------------------------------------------------------------------------------------------------------------------------------------------------------------------------------------------------------------------------------------------------------------------|
| Journal:                      | <i>BMJ Open</i>                                                                                                                                                                                                                                                                                                                                                                                                                                                                                                                                                                                                                                           |
| Manuscript ID                 | bmjopen-2018-025080                                                                                                                                                                                                                                                                                                                                                                                                                                                                                                                                                                                                                                       |
| Article Type:                 | Research                                                                                                                                                                                                                                                                                                                                                                                                                                                                                                                                                                                                                                                  |
| Date Submitted by the Author: | 28-Jun-2018                                                                                                                                                                                                                                                                                                                                                                                                                                                                                                                                                                                                                                               |
| Complete List of Authors:     | Gammon, Catherine; University of Cambridge, MRC Epidemiology Unit<br>Morton, Katie; University of Cambridge, MRC Epidemiology Unit<br>Atkin, Andrew; University of East Anglia Faculty of Medicine and Health Sciences; University of Cambridge, MRC Epidemiology Unit<br>Corder, Kirsten; University of Cambridge, MRC Epidemiology Unit<br>Daly-Smith, Andy; Leeds Beckett University<br>Quarmby, Thomas; Leeds Beckett University<br>Suhrccke, Marc; University of York Centre for Health Economics,<br>Turner, David; University of East Anglia, Public Health and Primary Care<br>van Sluijs, Esther; University of Cambridge, MRC Epidemiology Unit |
| Keywords:                     | Active lessons, Movement integration, Physical activity, Sedentary time, School health                                                                                                                                                                                                                                                                                                                                                                                                                                                                                                                                                                    |
|                               |                                                                                                                                                                                                                                                                                                                                                                                                                                                                                                                                                                                                                                                           |

SCHOLARONE™  
Manuscripts

1  
2  
3 **1 Introducing physically active lessons in UK secondary schools: feasibility**  
4  
5  
6 **2 study and pilot cluster-randomised controlled trial**  
7

8  
9 Catherine Gammon<sup>1</sup>, Katie Morton<sup>1</sup>, Andrew J Atkin<sup>1,2</sup>, Kirsten Corder<sup>1</sup>, Andy Daly-Smith<sup>3</sup>,  
10  
11 Thomas Quarmby<sup>3</sup>, Marc Suhrcke, David Turner<sup>2</sup>, Esther van Sluijs<sup>1\*</sup>  
12

13  
14 <sup>1</sup> MRC Epidemiology Unit and UKCRC Centre for Diet and Activity Research (CEDAR), University of  
15  
16 Cambridge, Cambridge, UK  
17

18  
19 <sup>2</sup> School of Health Sciences, University of East Anglia, Norwich, UK  
20

21  
22 <sup>3</sup> Carnegie School of Sport, Leeds Beckett University, Leeds, UK  
23

24  
25 <sup>4</sup> Centre for Health Economics, University of York, York, UK  
26

27  
28  
29  
30

31  
32 \* Corresponding author: Dr Esther van Sluijs ([ev234@medschl.cam.ac.uk](mailto:ev234@medschl.cam.ac.uk); 01223 769189)  
33

34  
35 Address: UKCRC Centre for Diet and Activity Research (CEDAR), MRC Epidemiology Unit, University  
36  
37 of Cambridge School of Clinical Medicine, Box 285 Institute of Metabolic Science, Cambridge  
38  
39 Biomedical Campus, Cambridge, CB2 0QQ, UK  
40

41  
42 **Keywords:** Active lessons, movement integration, physical activity, sedentary time, school health  
43

44  
45  
46  
47  
48  
49  
50  
51  
52  
53  
54  
55  
56  
57  
58  
59  
60 **Word count:** 4,917

1  
2  
3 17 **Abstract**  
4

5 18 **Objectives:** To assess the feasibility and acceptability of delivering a physically active lessons (PAL)  
6  
7 19 training programme to secondary school teachers and explore preliminary effectiveness for reducing  
8  
9 20 pupil's sedentary time.  
10

11  
12 21 **Design and setting:** Mixed-sex, non fee-paying, secondary schools in East England; one school  
13  
14 22 participated in a pre-post feasibility study, two in the pilot cluster-randomised controlled trial. In the  
15  
16 23 pilot trial, blinding to group assignment was not possible.  
17

18  
19 24 **Participants:** Across both studies, 321 randomly selected students (51% male; mean age: 12.9 years),  
20  
21 25 78 teachers (35% male) and two assistant head teachers enrolled; 296 (92%) students, 69 (88%)  
22  
23 26 teachers and two assistant head teachers completed the study.  
24

25  
26 27 **Intervention:** PAL training delivered to teachers over two, 2-hour after-school sessions, two weeks  
27  
28 28 apart. Teachers are made aware of how to integrate movement into existing lesson plans.  
29

30  
31 29 **Primary and secondary outcomes:** Quantitative and qualitative data were collected to assess  
32  
33 30 feasibility and acceptability of PAL training and delivery. Outcomes were assessed at baseline and ~8  
34  
35 31 weeks post-training; measures included accelerometer-assessed activity, self-reported well-being,  
36  
37 32 and classroom observations of time-on-task. Quantitative and qualitative process evaluation was  
38  
39 33 conducted at follow-up.  
40

41  
42 34 **Results:** In the feasibility study, teachers reported acceptability of PAL training and mixed  
43  
44 35 experiences of delivering PAL. In the pilot study, teacher's acceptability of PAL training was lower  
45  
46 36 and teachers identified aspects of the training in need of review, including the outdoor PAL training  
47  
48 37 component and learning challenge of the PAL strategies. In both studies, students and senior  
49  
50 38 leadership representatives reported acceptability of the intervention. Preliminary effectiveness for  
51  
52 39 reducing student's sedentary time during school was not demonstrated in either study.  
53  
54  
55  
56  
57  
58  
59  
60

1  
2  
3 40 **Conclusions:** No evidence of preliminary effectiveness on the primary outcome and mixed reports of  
4  
5 41 teacher's acceptability of PAL training suggest the need to review the training programme. The  
6  
7 42 results do not support continuation of research with the current intervention.  
8  
9

10 43 **Trial registration:** ISRCTN registry; ISRCTN38409550.  
11

12 44 **Funding:** Department of Health Policy Research Programme (PR-R5-0213-25001).  
13  
14  
15  
16  
17 45

## 18 46 **Article Summary**

### 19 20 47 **Strength and limitations of this study**

- 23 48 • We completed thorough feasibility and pilot testing work to inform the decision of whether to  
24  
25 49 progress with the current intervention and its evaluation.
- 27 50 • We collected quantitative and qualitative data which provided valuable information on  
28  
29 51 contextual influences and allowed us to address research questions more comprehensively.
- 31 52 • We were unable to collect all planned follow-up measures from teachers and students in  
32  
33 53 feasibility study, including teacher follow-up questionnaires and class observations of time-on-  
34  
35 54 task.
- 37 55 • We did not carry out longer-term follow-up measures of teacher acceptability and physically  
38  
39 56 active lesson delivery (i.e., beyond ~8 weeks post-training); longer follow-up would have  
40  
41 57 provided an indication of the sustainability of the intervention.  
42  
43  
44  
45  
46  
47  
48  
49  
50  
51  
52  
53  
54  
55  
56  
57

## 58 INTRODUCTION

59 Globally, most adolescents (~80%) do not achieve government-recommended physical activity  
60 guidelines [1] and engage in high levels of sedentary behaviour[2]. As such, interventions are needed  
61 to support youth in achieving a healthy activity profile. Secondary/high schools present an  
62 opportunity for the implementation of activity interventions as during school hours, activity is lower  
63 and sedentary time is higher than during other segments of an adolescent's week[3, 4].

64 The Creating Active School Environments (CASE) project is a three-year research programme funded  
65 by the UK Department of Health Policy Research Programme. CASE aims to identify environmental  
66 strategies to help adolescents move more and sit less during school hours. Initial phases of CASE  
67 involved a systematic literature review[5] and secondary data analysis[6] to identify promising  
68 secondary school-based activity interventions. Morton and colleagues (2017) subsequently  
69 completed a Delphi study, involving stakeholders in the prioritisation of interventions. Physically  
70 active lessons (PAL) were identified as the most feasible, acceptable and cost-effective intervention  
71 in secondary school settings[7]; these results informed the final, feasibility and pilot-testing phase of  
72 CASE.

73 PAL are a pedagogical approach whereby activity supports the delivery of academic material[8].  
74 During PAL, movement is integrated into teaching and as such, PAL are distinct from  
75 'brain/movement breaks', when activity is separate from learning. Evidence from primary schools  
76 indicates that PAL can improve physical activity, academic achievement and lesson enjoyment [9-  
77 12]. To our knowledge, only two studies have trialled the use of PAL among adolescents [13, 14].  
78 Helgeson (2013) reported no influence of the 'Energizers' PAL programme on reading  
79 comprehension scores among junior high school students and did not explore activity levels as a  
80 primary outcome[13]. Cothran and colleagues (2010) reported on primary and secondary/high  
81 school teacher's experiences of a one-year movement integration intervention. Compared to  
82 primary school teachers, secondary teachers faced different challenges when attempting to

1  
2  
3 83 integrate activity into lessons, in particular standardised testing pressures and students not staying  
4  
5 84 with one teacher all day (as typically is the case in primary schools)[14]. Cothran and colleagues did  
6  
7 85 not measure student activity behaviours as an intervention outcome[14]. The positive effects of PAL  
8  
9 86 reported for primary students suggest there is value in exploring if secondary students can  
10  
11 87 experience similar benefits. Given the organisational and environmental differences between  
12  
13 88 primary and secondary schools, it is important to conduct high quality feasibility and pilot testing of  
14  
15 89 secondary school PAL interventions.

16  
17  
18 90 A PAL training programme for secondary school teachers was tested in a feasibility study and a  
19  
20 91 cluster-randomised controlled pilot study. The studies aimed to explore the feasibility, acceptability,  
21  
22 92 preliminary effectiveness and costs of a PAL training programme for secondary teachers.  
23  
24 93 Acceptability of study processes was also examined, in anticipation of conducting a subsequent full  
25  
26 94 trial. This paper presents the feasibility study and pilot study followed by an overall discussion and  
27  
28 95 conclusion (ISRCTN38409550).

## 30 31 96 **1. FEASIBILITY STUDY**

32  
33  
34 97 Ethical approval for both studies was granted by the University of Cambridge's School of the  
35  
36 98 Humanities and Social Sciences. The aim of the feasibility study was to assess (i) the feasibility,  
37  
38 99 acceptability, costs, and preliminary effectiveness of a PAL training programme for secondary school  
39  
40 100 teachers, and (ii) the feasibility and acceptability of study procedures.

41  
42  
43 101

### 44 45 46 102 **Feasibility Study - Methods**

#### 47 48 49 103 **Recruitment**

50  
51 104 Potential schools were identified from previous local research and approached with study  
52  
53 105 information (n=2). One mixed-sex, non fee-paying secondary school participated. The head teacher  
54  
55 106 provided written consent for the intervention to be delivered to the teachers and elected for the

1  
2  
3 107 intervention to be trialled with maths and English teachers. The school were told they would be able  
4  
5 108 to keep the PAL training resources.

6  
7  
8 109 Parents of all Year 7 and 9 students (11-14 years) received study information and students were  
9  
10 110 invited to participate in evaluation measures. Parents were given two weeks to opt out (passive  
11  
12 111 parental consent) via email, freephone, or freepost. From the students who had not been opted out,  
13  
14 112 120 (sixty Year-7 and sixty Year-9 students; 50% male) were randomly selected for evaluation  
15  
16 113 measures (using class lists and random number generating software). The study's feasibility focus  
17  
18 114 meant that a formal power calculation was not necessary to inform sample size; a sample of 60  
19  
20 115 participants per year is consistent with samples of similar studies[15]. Students provided written  
21  
22 116 assent for evaluation measures.

23  
24  
25 117 Maths and English teachers (n=15) received study information two weeks before the PAL training.  
26  
27 118 The senior leadership team requested that all maths and English teachers attended the training.  
28  
29 119 Teachers could choose to participate in the evaluation measures, those agreeing provided written  
30  
31 120 consent. Over five school days students received approximately five maths lessons and four English  
32  
33 121 lessons.

## 34 35 36 122 Intervention

37  
38  
39 123 The PAL training was developed by a team with teacher training qualifications and experience in  
40  
41 124 indoor (two trainers) and outdoor active learning (one trainer). Table 1 outlines the training  
42  
43 125 programme and example active lessons are published as supplementary material. The focus was on  
44  
45 126 supporting teachers to adopt active pedagogical approaches, rather than providing new, PAL plans.  
46  
47 127 Figure 1 outlines the preliminary logic model of how the teacher-focused intervention could lead to  
48  
49 128 changes in student's activity. Prior to the training, the research team visited the participating school  
50  
51 129 and ascertained the availability of indoor and outdoor spaces and equipment that could be used for  
52  
53 130 PAL. Syllabi for maths and English were requested to allow trainers to prepare relevant examples for  
54  
55 131 the training.



1  
2  
3 132 Measurements  
4

5 133 Table 1 outlines the timeline of study measures. Feasibility and acceptability were assessed using  
6  
7 134 questionnaires and focus groups. Three focus groups (with five teachers, eight Year-7 and four Year-  
8  
9 135 9 students) and an interview with the assistant head teacher were completed using a semi-  
10  
11 136 structured interview.  
12  
13

14 137 *Feasibility/acceptability of the intervention:* Questionnaire items and focus group questions asked  
15  
16 138 about teacher's perceptions of the utility, value and relevance of the training (adapted from[16, 17]).  
17  
18 139 Questionnaires asked if teachers would recommend the training to other teachers and provided  
19  
20 140 free-text boxes for teachers to suggest improvements. Training session attendance rates were  
21  
22 141 recorded.  
23  
24

25 142 *Feasibility/acceptability of PAL delivery:* Questionnaire items and focus group questions asked  
26  
27 143 teachers about classroom management during PAL, enjoyment of teaching PAL, time needed to  
28  
29 144 prepare and deliver PAL, and barriers to PAL delivery (items from[18]).  
30  
31

32 145 *Acceptability of PAL participation:* Questionnaire items and focus group questions asked students  
33  
34 146 about their experience of PAL participation, enjoyment of PAL, their preference for active vs. desk-  
35  
36 147 based lessons, and the best and worst things about PAL.  
37  
38

39 148 *Costs:* Teachers and students reported resources purchased to deliver/participate in PAL. The  
40  
41 149 research team recorded time and costs associated with the training team's development and  
42  
43 150 delivery of the intervention.  
44  
45

46 151 *Study processes:* The research team made field notes on study processes that proved to be  
47  
48 152 challenging or ineffective, for example, students struggling to understand a questionnaire item.  
49  
50

51 153 *Student anthropometry:* Anthropometric measures were completed by trained staff using standard  
52  
53 154 procedures. Height was measured using a stadiometer (Leicester height measure, Chasmors,  
54  
55 155 Leicester, UK) to the nearest 0.1 cm, and weight was measured to the nearest 0.1 kg (Tanita, type  
56  
57  
58  
59  
60

1  
2  
3 156 TBF-300A, Tokyo, Japan). Height, weight, sex, birthdate and measurement date were used to  
4  
5 157 calculate participants' body mass index (BMI; kg/m<sup>2</sup>) and BMI percentile.

6  
7 158 *Activity intensity:* Axivity AX3 triaxial wrist-worn accelerometers (non-dominant wrist) were used to  
8  
9 159 measure activity behaviours. These devices have been used among a larger sample of Year-9  
10  
11 160 participants in the GoActive study[19] and the UK Biobank Cohort Study[20]. Wrist-worn monitors  
12  
13 161 are validated for the assessment of energy expenditure in pediatric populations[21] with higher  
14  
15 162 participant compliance when compared to waist-worn accelerometers[22]. Participants were given  
16  
17 163 verbal and written instructions on monitor wear, including that the monitor was waterproof and  
18  
19 164 could be worn continuously for the next seven days.

20  
21  
22  
23 165 The first day of monitor wear was dropped[23]; included participants provided valid data for ≥80% of  
24  
25 166 school hours for ≥two school days, at baseline and follow-up[24-26]. Acceleration was recorded at  
26  
27 167 100Hz with a dynamic range of ±8g. Data from the monitors was downloaded in continuous  
28  
29 168 waveform. Euclidean Norm Minus One (ENMO) represents acceleration magnitude at each  
30  
31 169 measurement, accounting for the influence of gravity. ENMO thresholds were used to classify  
32  
33 170 activity intensities: time spent at 0-30 ENMO was classified as sedentary activity (equivalent to 1-1.5  
34  
35 171 METs); 30-210 ENMO as light-intensity activity (1.5-4 METs); 210-500 ENMO as moderate-intensity  
36  
37 172 activity (4-7 METs), and above 500 ENMO as vigorous-intensity activity[27, 28].

38  
39  
40 173 *Mental Health and Wellbeing:* Students completed questionnaire measures of positive and negative  
41  
42 174 affect[29], academic efficacy, disruptive behaviour[30], enjoyment of school classes[31] and health  
43  
44 175 related quality of life[32] at baseline and follow-up. All questionnaires are validated for use with  
45  
46 176 adolescents.

47  
48  
49 177 *Time-on-task:* Student's time-on-task was assessed during lessons by one member of the research  
50  
51 178 team. In each class, four students were observed using a momentary time-sampling procedure  
52  
53 179 (which incurs less bias than other sampling procedures[33, 34]). Each student was observed once per

1  
2  
3 180 minute, for the duration of the lesson. Student's behaviour was coded as: (i) on-task, (ii) off-task-  
4  
5 181 passive, (iii) off-task-motor, or (iv) off-task-noise[35].  
6

7  
8 182 Prior to classroom observations, a validation activity was completed where two researchers  
9  
10 183 discussed definitions and concurrently coded student behaviour using four online videos. Observers'  
11  
12 184 codes matched for 95% of observation intervals.  
13

#### 14 185 Descriptive Statistics

15  
16  
17 186 Descriptive statistics of the sample, primary and secondary outcomes, and quantitative measures of  
18  
19 187 feasibility and acceptability are summarised. Focus group transcripts were reviewed; recurring  
20  
21 188 comments and themes relevant to the research questions were identified.  
22  
23

24 189

#### 25 26 27 190 **Feasibility Study - Results**

##### 28 29 191 Recruitment and sample characteristics

30  
31  
32 192 Student and teacher recruitment and characteristics are summarised in supplementary tables 1 and  
33  
34 193 2. 99 Students were recruited, with 91 (92%) providing data at baseline and follow-up. Students had  
35  
36 194 a mean age of 13.0 years, 52% were male and 27% were classified as overweight/obese. Teachers  
37  
38 195 were predominantly female (67%) and below the age of 45 (83%).  
39  
40

##### 41 196 Feasibility and Acceptability

42  
43  
44 197 Training session one was attended by 14 teachers (7 maths, 7 English), training session two was  
45  
46 198 attended by 12 teachers (7 maths, 5 English), 11 teachers attended both sessions. Teacher feedback  
47  
48 199 demonstrated acceptability of the training, with 100% recommending the training to other teachers  
49  
50 200 (supplementary table 3). Individual and collective efficacy for delivering PAL improved from 2.7 to  
51  
52 201 3.2, and 2.4 to 3 (out of 4), respectively. At follow-up, ≥eight teachers had attempted to deliver PAL.  
53  
54 202 Teacher's goals for PAL delivery averaged 2.1 (SD=1.0) lessons per week, with an average targeted  
55  
56  
57  
58  
59  
60

1  
2  
3 203 reduction in sitting time of 15.8 (SD=8.0) minutes. Some teachers reported positive experiences of  
4  
5 204 delivering PAL, while others reported challenges (Text box 1).

6  
7 205 Teacher-reported barriers included disruptive behaviour, lethargy and off-topic chatting, challenges  
8  
9 206 re-focusing students after an active portion of class, and limited classroom space. Teachers identified  
10  
11 207 facilitators of PAL delivery as theirs and the students' enjoyment of PAL, good weather allowing  
12  
13 208 them to go outside, more classroom space and a more diligent group of students. Teachers reported  
14  
15 209 ≤15 extra minutes were required to plan PAL, and a few extra minutes were needed to prepare  
16  
17 210 students for PAL participation.

18  
19  
20  
21 211 Of the students who recalled participating in an active lesson (43 out of 91 [47%]), most preferred  
22  
23 212 PAL to desk-based lessons (70%; 19% indicated 'no preference') and 93% wanted teachers to  
24  
25 213 continue delivering them. Students reported enjoying going outside and moving around (30%), that  
26  
27 214 PAL were less boring/more fun than desk-based lessons (26%) and that they could concentrate  
28  
29 215 better (14%). Negative comments about PAL included lethargy (12%), more disruptive behaviour  
30  
31 216 (9%), and less work achieved (12%; text box 1).

32  
33  
34 217 The assistant head felt the training was well-received and high quality professional development.

35  
36 218 The assistant head teacher stated the reason for participating had been the potential for improving  
37  
38 219 student's mental health and the school's motivation to be innovative in the classroom. The assistant  
39  
40 220 head teacher commented that teaching staff had enjoyed taking their students outside for lessons  
41  
42 221 and the project had involved a low level of commitment from the school.

43  
44  
45 222 Costs

46  
47  
48 223 Training delivery costed £910, comprised of £410 staff costs and £500 for training equipment.

49  
50 224 Participants reported purchasing sticky tape (teacher, ~£2) and shoes and tights (student, ~£30).

51  
52  
53 225 Study Processes

1  
2  
3 226 The majority of study procedures were completed successfully. Challenges encountered included  
4  
5 227 that students struggled to complete a blank timetable indicating when their Maths and English  
6  
7 228 lessons were, and despite efforts, we were unable to schedule follow-up classroom observations.  
8  
9 229 Teacher baseline questionnaire return was low and the follow-up focus group was conducted in a  
10  
11 230 15-minute timeslot due to late changes.

12  
13  
14 231 Preliminary effectiveness

15  
16  
17 232 Table 2 summarises baseline and follow-up data for all student measures.

18  
19  
20 233 **Feasibility Study - Reflections**

21  
22 234 The findings suggest it is feasible and acceptable to deliver a PAL training program to secondary  
23  
24 235 school maths and English teachers. Importantly, the senior leadership representative was supportive  
25  
26 236 of the training[36]. Secondary school teachers had mixed reports of delivering PAL, the identified  
27  
28 237 barriers and facilitators were consistent with those previously reported[36]. It was noted that  
29  
30 238 teacher acceptability of PAL delivery should be explored further in the next phase of intervention  
31  
32 239 evaluation. The positive student response to PAL indicates acceptability and is consistent with  
33  
34 240 results from PAL interventions in primary schools[37].

35  
36  
37  
38 241 We were successful in recruiting and consenting participants, and the majority of evaluation  
39  
40 242 measures were completed without problems. The retention of >90% of participants from baseline to  
41  
42 243 follow-up suggests evaluation measures were acceptable. Suggested changes included scheduling all  
43  
44 244 research activities at the start of the project and acquiring student timetables from the school's  
45  
46 245 administration team.

47  
48  
49 246 Limitations of this feasibility study include the small sample size and the lack of control group,  
50  
51 247 making it not possible to draw conclusions about the contribution of the intervention to the  
52  
53 248 observed changes. The change in sedentary activity levels is inconsistent with previous research  
54  
55 249 reporting that younger children's sedentary time on weekdays decreases between spring and

1  
2  
3 250 summer[38]. Increased negative feelings and lower wellbeing among students between March and  
4  
5 251 June is consistent with typical changes observed in student's wellbeing over a school term[39, 40].  
6  
7  
8 252

## 9 253 **2. PILOT STUDY**

11  
12 254 Following successful implementation of the intervention in the feasibility study, we sought to extend  
13  
14 255 our previous work and explore the potential value of conducting a full-scale randomised controlled  
15  
16 256 trial. The aims of the pilot cluster-randomised controlled trial were (i) to assess the feasibility,  
17  
18 257 acceptability, preliminary effectiveness and costs of delivering a PAL intervention at a whole-school  
19  
20 258 level (to all subject teachers) and (ii) to test the acceptability of school-level randomisation.  
21  
22  
23 259

### 24 25 26 260 **Pilot Study - Methods**

#### 27 28 29 261 Recruitment and Randomisation

30  
31  
32 262 *Schools:* We aimed to recruit three schools (two intervention, one control). In June-July 2017, 26 non  
33  
34 263 fee-paying, mixed gender, secondary schools in the East of England were emailed study information  
35  
36 264 and invited to participate. The first three schools to agree were recruited; one school withdrew prior  
37  
38 265 to student recruitment (and randomisation). We were unable to replace the school within an  
39  
40 266 appropriate timeframe. After baseline measures, individuals separate from the research team  
41  
42 267 performed a coin-toss to assign intervention and control schools. The nature of the intervention and  
43  
44 268 goals of the evaluation measures meant it was not possible to blind participants. Due to differences  
45  
46 269 in follow-up measures between control and intervention schools, it was not possible to blind  
47  
48 270 measurement staff at follow-up.

49  
50  
51 271 *Students:* Recruitment proceeded as outlined for the feasibility study. Schools were asked to choose  
52  
53 272 one younger year (7 or 8) and one older year (9 or 10) group to participate in evaluation measures.  
54  
55 273 This would allow assessment of differential responses to the intervention by age. The intervention  
56  
57  
58  
59  
60

1  
2  
3 274 school selected Years 7 and 9 and the control school selected Years 8 and 9. Following feasibility  
4  
5 275 study procedures, we randomly selected 130 students (50% male, 50% from each year) from each  
6  
7 276 school for evaluation measures (based on feasibility study retention rates), with the aim of obtaining  
8  
9 277 full data on 100 participants.

10  
11  
12 278 *Teachers:* A teacher information and recruitment meeting was scheduled at both schools, during  
13  
14 279 which a researcher introduced the study and distributed consent forms. Teachers were advised by  
15  
16 280 their senior leadership team that they would be required to attend the PAL training if allocated as  
17  
18 281 the intervention school; all teachers were free to decide on participation in evaluation measures.

#### 20 21 282 Intervention

22  
23 283 Extending the feasibility study, the intervention was delivered to all subject teachers. Training all  
24  
25 284 subject teachers is consistent with the whole-school approach recommended for activity promotion  
26  
27 285 and obesity prevention among youth[41, 42]. Given the acceptability of the training demonstrated in  
28  
29 286 the feasibility study, the structure and goals of the training for the pilot study were similar. Minimal  
30  
31 287 changes were made to the indoor training component, which focused on generic active learning  
32  
33 288 strategies, applicable to any subject (e.g., different workstations around the classroom). In the  
34  
35 289 feasibility study, the outdoor training component provided multiple subject- and topic-specific  
36  
37 290 lesson ideas; the inclusion of all subject teachers meant fewer subject-specific examples could be  
38  
39 291 actively worked through during the pilot study training. One additional outdoor lessons trainer was  
40  
41 292 involved to train the larger group of teachers.

#### 42 43 44 45 293 Measurements

46  
47  
48 294 Table 1 outlines the timeline of study measures; all data were collected at schools, during school  
49  
50 295 hours. To increase teacher baseline questionnaire return, questionnaires were distributed during the  
51  
52 296 pre-training teacher information meeting, and completed following consent. Data collection  
53  
54  
55  
56  
57  
58  
59  
60

1  
2  
3 297 followed the same procedures as described for the feasibility study, except for the assessment of  
4  
5 298 PAL dose and time on task.

6  
7 299 *PAL Dose:* A teacher timetable was created using school-provided student timetables, detailing their  
8  
9 300 Year 7 and 9 lessons. During the student accelerometer assessment at follow-up, teachers were  
10  
11 301 given their personalised timetable and asked 'please circle which of the listed Year 7 and/or 9 classes  
12  
13 302 were (or will be) delivered as an active lesson.' Teacher's responses were used to calculate PAL dose.

14  
15  
16  
17 303 *Time on task:* Four lessons were observed at baseline and follow-up, at both schools.

#### 18 19 304 **Pilot Study - Results**

20  
21  
22 305 Figure 2 shows the flow of participants, with further information on student and teacher recruitment  
23  
24 306 and sample characteristics in supplementary tables 1 and 2. 222 students assented, of which 205  
25  
26 307 (92%) provided data at two time points. Half of the students were male and 24% were classified as  
27  
28 308 overweight/obese. The majority of teachers were female and >50% of staff reported delivering at  
29  
30 309 least one PAL a week at baseline. At the intervention school, 30 and 33 teachers attended training  
31  
32 310 session one and two, respectively (29 teachers attended both).

#### 33 34 35 311 **Feasibility and Acceptability**

36  
37  
38 312 Average scores regarding teacher's acceptability of the training fell below 4 (the 'neutral' value)  
39  
40 313 indicating negative feelings towards the training (supplementary table 3). Teachers reported training  
41  
42 314 activities to be more suited for primary schools and not sufficiently challenging for secondary  
43  
44 315 students. One teacher commented: "*they were more bonus activities, like extra treat things... you*  
45  
46 316 *couldn't get much learning done through them*" (Science teacher, female). Teachers felt it was  
47  
48 317 assumed they weren't delivering PALs prior to the training and this created resistance towards the  
49  
50 318 training effort. Teachers reported that the PAL ideas were not novel and repetitive, the focus on  
51  
52 319 outdoor learning was distracting, and the value of outdoor activities wasn't clear.



1  
2  
3 320 More than half of teachers reported delivering at least one PAL a week at baseline. PAL delivery  
4  
5 321 decreased for four teachers (11%), was maintained by six teachers (17%), and increased for 13  
6  
7 322 teachers (36%) (excluding P.E. and drama teachers). At follow-up, teachers indicated they were likely  
8  
9 323 to continue teaching PAL, although they reported concerns about students not learning as much  
10  
11 324 during PAL. Some teachers felt older students could be more lethargic and resistant: *"the younger*  
12  
13 325 *ones love getting up and interacting with each other. I think the older ones do, it just takes... more*  
14  
15 326 *effort to get them going"* (History teacher, female).

16  
17  
18 327 The majority of teachers reported ≤15 minutes for planning, ≤5 minutes for classroom preparation,  
19  
20 328 and ≤5 minutes for student preparation. The time needed to deliver an outdoor activity – in  
21  
22 329 particular the transition between indoors and outdoors - was identified as a barrier to  
23  
24 330 implementation. The assistant head teacher also commented about the pitch of the training and  
25  
26 331 poor use of learning time due to transitioning. They felt the indoor component of the training had  
27  
28 332 been more informative and appropriate, and commented staff had used active learning strategies  
29  
30 333 indoors, but not outdoors. Finally, they commented that PAL implementation had declined with  
31  
32 334 time.

33  
34  
35 335 Of the students who recalled participating in a PAL (58%), >90% wanted teachers to continue  
36  
37 336 teaching PAL, with no evidence of differences in intervention acceptability by sex or weight status.  
38  
39 337 Students commented that PAL were fun and helped learning, and they liked moving more: *"I really*  
40  
41 338 *enjoyed it. It gave me more of an understanding... because when you're just copying off the board*  
42  
43 339 *some writing I don't always understand it, then when you're moving about it's a lot more clearer"*  
44  
45 340 (Year-7, female). Students however also commented that during PAL some students messed around  
46  
47 341 more and didn't focus on work, and work was easier to do when sitting down.

48  
49  
50  
51 342 Student PAL dose

52  
53  
54 343 In one week, 62/175 lessons (35%) to Year 7 and 9 students were active (31 lessons each). Each  
55  
56 344 teacher delivered an average of 2.2 PALs (range = 0-9). Year-7 students received an average of 6.9

1  
2  
3 345 PAL (range: 5-10; 28% of one week's lessons) and Year-9 students 6.9 (range: 2-13; 28%). This  
4  
5 346 represents the contribution across all subjects.

6  
7 347 Costs

8  
9  
10 348 The cost of delivering the training was £901, comprised of £451 staff time and £450 equipment.  
11  
12 349 Session one was delivered by three trainers, while session two was delivered by four trainers. Four  
13  
14 350 teachers purchased resources to support PAL delivery, including science equipment, textiles  
15  
16 351 equipment, post-it notes and whiteboard pens, and printed resources. Four students reported  
17  
18 352 purchasing resources to support PAL participation – three purchased sports shoes (~£30 per pair)  
19  
20 353 and one a mouth guard (~£7).

21  
22  
23 354 Preliminary Effectiveness

24  
25  
26 355 Table 3 presents activity intensity during PAL at follow-up and the equivalent lesson at baseline  
27  
28 356 (excluding P.E. and drama lessons). There was no evidence of changes in time spent in different  
29  
30 357 activity intensities. Table 4 summarises baseline and follow-up values for all outcome measures for  
31  
32 358 intervention and control participants. There was no evidence of effectiveness.

33  
34  
35 359 **Pilot Study - Reflections**

36  
37  
38 360 Extending the work conducted in the feasibility study, this pilot study demonstrates the feasibility of  
39  
40 361 whole-school intervention delivery. However, teachers expressed numerous concerns about the PAL  
41  
42 362 training, including the insufficiently challenging content, lack of understanding of the value/purpose  
43  
44 363 of the outdoor component, and potential loss of valuable learning time. These examples are  
45  
46 364 consistent with previous research reporting that time and standardised testing pressures are barriers  
47  
48 365 to PAL implementation, particularly for secondary school teachers[14]. The feedback suggests a  
49  
50 366 need to review the content of the training, particularly the outdoor component.

51  
52  
53 367 Teacher's comments indicated acceptability of delivering PAL and there was a measurable increase  
54  
55 368 in PAL delivery. Feedback suggests teacher's acceptability may reflect prior knowledge and

1  
2  
3 369 experience of PAL. In addition, students reported enjoying PAL. Support for the intervention by  
4  
5 370 multiple stakeholders is an important facilitator of successful implementation[36]; as such, the  
6  
7 371 feedback received here is encouraging.  
8  
9

10 372 We successfully tested study procedures and intervention delivery at a whole-school level, with  
11  
12 373 adequate recruitment and retention rates and continued control school involvement indicating  
13  
14 374 acceptability of randomisation. Efforts made to improve data collection processes from the  
15  
16 375 feasibility study, e.g., of student timetables and teacher questionnaires, were successful.  
17

18  
19 376 The assessment of PAL dose showed that students received an average of 6-7 x 60-minute PAL a  
20  
21 377 week, which has the potential to make a valuable contribution to reducing sedentary time among  
22  
23 378 adolescents. Despite a measured increase in PAL delivery, there was no evidence of reduced  
24  
25 379 sedentary time, suggesting a need to review the PAL strategies that were shared with teachers, with  
26  
27 380 a focus on the amount of activity introduced.  
28

29  
30 381  
31

## 32 382 **OVERALL DISCUSSION**

33  
34  
35 383 In this project, we aimed to assess the feasibility, acceptability, preliminary effectiveness and costs  
36  
37 384 of a teacher-training programme for integrating activity into secondary school lessons. We also  
38  
39 385 sought to understand the feasibility and acceptability of study procedures, including repeated  
40  
41 386 accelerometer wear and school-level randomisation. The intervention was successfully delivered in  
42  
43 387 two schools and quantitative and qualitative data was successfully collected from multiple  
44  
45 388 stakeholders, enabling us to address all research questions. The majority of PAL evaluations have  
46  
47 389 been carried out in primary schools[9] and as such, this study makes a valuable contribution to the  
48  
49 390 literature.  
50

## 51 52 53 391 **Feasibility/acceptability of PAL training**

54  
55  
56  
57  
58  
59  
60

1  
2  
3 392 Consistent with previous research, it was feasible to deliver PAL training to secondary school  
4  
5 393 teachers over two, 2-hour, after-school sessions[43]. While acceptability of the training was  
6  
7 394 demonstrated in the feasibility study and is reported elsewhere[16, 37, 43], feedback from teachers  
8  
9 395 in the pilot study was less positive. Delivery to teachers of two subjects in the feasibility study meant  
10  
11 396 a smaller training group and a smaller trainer:staff ratio than in the pilot study. This allowed more  
12  
13 397 subject-specific discussion and more time to address teacher's personal questions. Teacher feedback  
14  
15 398 suggests that training acceptability is related to teacher's experience delivering PAL. In the pilot  
16  
17 399 study, teachers delivering PAL more regularly rated the intervention more poorly than less  
18  
19 400 experienced teachers. A PAL intervention targeting teachers not regularly delivering PAL may be  
20  
21 401 more acceptable. The positive responses to the training in the feasibility study (involving teachers  
22  
23 402 reporting low levels of PAL delivery) support this suggestion.

#### 26 403 **Feasibility/acceptability of delivering/participating in PAL**

27  
28  
29 404 In the feasibility study, teachers had mixed reviews of delivering PAL, whereas in the pilot study,  
30  
31 405 teachers reported acceptability of delivering PAL. Pilot study teachers were more likely to report  
32  
33 406 regular PAL delivery at baseline than feasibility teachers and to have had previous exposure to PAL  
34  
35 407 during their initial teacher training and/or career. A longer trial period and increased support may  
36  
37 408 have allowed teachers in the feasibility study to become more confident and accrue more positive  
38  
39 409 PAL experiences. Overall, the data suggest that PAL delivery can be acceptable to secondary school  
40  
41 410 teachers.

42  
43  
44 411 While teachers were the direct intervention recipients and their acceptability is crucial for successful  
45  
46 412 implementation, it is important to consider acceptability for other stakeholders, who also influence  
47  
48 413 implementation. Across both studies students responded positively to PAL, and senior leadership  
49  
50 414 representatives reported satisfaction with the intervention (in the pilot study, satisfaction with the  
51  
52 415 indoor component). Both senior leadership representatives commented that reasons for study  
53  
54 416 participation included the potential positive influence on student's mental health. This observation is

1  
2  
3 417 consistent with previous findings[7] and indicates potentially effective strategies for promotion of  
4  
5 418 the intervention to schools.

#### 6 7 8 419 **Preliminary Effectiveness**

9  
10 420 Despite a measured increase in PAL delivery, no changes in activity were observed. Other PAL  
11  
12 421 feasibility and pilot studies have reported more encouraging changes[35, 44, 45]. In the feasibility  
13  
14 422 study, early implementation efforts of Maths and English teachers may not have been sufficient to  
15  
16 423 translate to changes in activity. Across both studies, teachers were advised that any non-seated  
17  
18 424 activity was considered an 'active lesson' - as such, the intervention may be too dilute for  
19  
20 425 measurable impact using wrist-worn accelerometers. Overall, the results suggest the need to review  
21  
22 426 the amount of activity the PAL strategies introduce.

23  
24  
25 427 Students received an encouraging dose of PAL (6-7 x 60-minute lessons per week). This dose is  
26  
27 428 consistent with previous studies, for example, 10-30 minutes of activity, daily[35, 45-48] and 3 x 60-  
28  
29 429 minute PAL per week[49]. It is worth noting that teachers in the current pilot study chose how many  
30  
31 430 PAL they delivered, rather than being prescribed a weekly target; as such the dose indicates what is  
32  
33 431 naturally achievable by secondary school teachers. A weekly dose of 6-7 PAL has the potential to  
34  
35 432 substantially reduce adolescent's sedentary time during school hours, providing sufficient activity is  
36  
37 433 introduced as part of the PAL.

#### 38 39 40 41 434 **Costs**

42  
43  
44 435 Training delivery costs (independent of travel and planning time) was estimated around £900  
45  
46 436 (\$1,187) in both studies. Strategies to reduce costs could include reducing the number of staff  
47  
48 437 delivering the sessions or hiring staff with a mixture of training levels, rather than the highly  
49  
50 438 experienced staff in the current studies. Approximately 25% of the cost was spent on equipment,  
51  
52 439 primarily for outdoor-based subject-specific examples; reviewing the equipment purchases may  
53  
54 440 identify cost saving opportunities. Research reports that small grants (~\$2,000) to schools can lead

1  
2  
3 441 to increased implementation of practices to promote activity[50]. Senior leadership teams  
4  
5 442 commented on how thinly English schools budgets are stretched; it was suggested that school funds  
6  
7 443 set aside for (for example) mental health services might represent an avenue of funding for the  
8  
9 444 programme for some schools.

## 10 11 12 445 **Strengths and Limitations**

13  
14 446 High quality formative work for interventions is necessary to ensure appropriate allocation of  
15  
16 447 research efforts and funding, and the publication of feasibility and pilot research is important to  
17  
18 448 support other researchers and interventionists[51]. Limitations of this work include that samples  
19  
20 449 were predominantly white; consequently, we are unable to explore differential responses to PAL by  
21  
22 450 ethnicity. Moreover, parental opt out consent procedures limited the ability to obtain information  
23  
24 451 on participant's socioeconomic position. The issue of lack of diversity among samples in PAL studies  
25  
26 452 has been previously raised[52]; future research should seek to explore feasibility, acceptability and  
27  
28 453 effectiveness among different racial/ethnic and socio-economic groups. Estimated training delivery  
29  
30 454 costs are based on wage rates, national insurance and superannuation costs but don't include  
31  
32 455 overhead costs such as costs of employing individuals and providing building space. As such, training  
33  
34 456 delivery costs may be underestimated. In addition, we did not carry out longer-term follow-up  
35  
36 457 assessments so we do not know if teachers continued to deliver PAL beyond eight weeks after the  
37  
38 458 training.

## 39 40 41 42 459 **CONCLUSION**

43  
44  
45 460 We successfully demonstrated the feasibility and acceptability of introducing and evaluating a PAL  
46  
47 461 teacher-training programme in secondary schools. Across feasibility and pilot studies, teachers'  
48  
49 462 acceptability of the intervention and of delivering PAL was demonstrated, although aspects of the  
50  
51 463 training programme, particularly the outdoor component, require review. The intervention was  
52  
53 464 acceptable to students and senior leadership representatives, and the dose of PAL received by  
54  
55 465 students was sufficient to have the potential to make a substantial contribution to reducing

1  
2  
3 466 adolescent's sedentary time during school hours. However, we did not observe preliminary  
4  
5 467 effectiveness on students' activity behaviours. Taken together, the findings do not support  
6  
7 468 continuation with the current PAL training programme, though its acceptability does highlight the  
8  
9 469 need for further research into how the identified barriers might be overcome.

10  
11  
12  
13  
14  
15  
16  
17  
18  
19  
20  
21  
22  
23  
24  
25  
26  
27  
28  
29  
30  
31  
32  
33  
34  
35  
36  
37  
38  
39  
40  
41  
42  
43  
44  
45  
46  
47  
48  
49  
50  
51  
52  
53  
54  
55  
56  
57  
58  
59  
60

For peer review only

1  
2  
3 470 **ACKNOWLEDGEMENTS**  
4

5 471 The Creating Active School Environments (CASE) project is a three-year programme of research  
6  
7 472 funded by the Department of Health Policy Research Programme (PR-R5-0213-25001). This report is  
8  
9 473 based on independent research commissioned and funded by the NIHR Policy Research Programme  
10  
11 474 (Opportunities within the school environment to shift the distribution of activity intensity in  
12  
13 475 adolescents; PR-R5-0213-25001). The views expressed in the publication are those of the author(s)  
14  
15 476 and not necessarily those of the NHS, the NIHR, the Department of Health, 'arms' length bodies or  
16  
17 477 other government departments.  
18

19  
20  
21 478 The authors would like to thank the schools, students, teachers and senior leadership  
22  
23 479 representatives for their participation in the feasibility and pilot studies. In addition, the authors  
24  
25 480 would like thank everyone who supported the data collection, as well as Colin Farr, Beth Haines and  
26  
27 481 Gwen Brierley for their study co-ordination support, and Antonia Smith and Kate Westgate for their  
28  
29 482 assistance in the preparation and processing of the accelerometer data.  
30

31  
32 483

33  
34 484 **Data sharing**  
35

36 485 The datasets are not available for download. The study's participant information sheets and ethics  
37  
38 486 applications stipulated that the data would not be shared outside of the research team. The data are  
39  
40 487 held at the MRC Epidemiology Unit at the University of Cambridge.  
41

42 488

43  
44  
45 489 **Competing interests**  
46

47 490 The authors declare that they have no competing interests.  
48

49 491

50  
51 492

52  
53 493

54  
55 494  
56  
57  
58  
59  
60



1  
2  
3  
4  
5  
6  
7  
8  
9  
10  
11  
12  
13  
14  
15  
16  
17  
18  
19  
20  
21  
22  
23  
24  
25  
26  
27  
28  
29  
30  
31  
32  
33  
34  
35  
36  
37  
38  
39  
40  
41  
42  
43  
44  
45  
46  
47  
48  
49  
50  
51  
52  
53  
54  
55  
56  
57  
58  
59  
60

495 **Author contributions**

496 All authors contributed to the conceptualisation and design of the work, and reviewed and approved  
497 the final manuscript. CG, DT, and EvS contributed to the acquisition, analysis and interpretation of  
498 data. CG drafted the manuscript.

For peer review only

## REFERENCES

1. Hallal, P.C., et al., *Global physical activity levels: surveillance progress, pitfalls, and prospects*. The Lancet, 2012. **380**(9838): p. 247-257.
2. Matthews, C.E., et al., *Amount of time spent in sedentary behaviors in the United States, 2003-2004*. Am J Epidemiol, 2008. **167**(7): p. 875-81.
3. Brooke, H.L., et al., *Changes in time-segment specific physical activity between ages 10 and 14 years: A longitudinal observational study*. J Sci Med Sport, 2016. **19**(1): p. 29-34.
4. Steele, R.M., et al., *An investigation of patterns of children's sedentary and vigorous physical activity throughout the week*. Int J Behav Nutr Phys Act, 2010. **7**: p. 88.
5. Morton, K.L., et al., *The school environment and adolescent physical activity and sedentary behaviour: a mixed-studies systematic review*. Obes Rev, 2016. **17**(2): p. 142-58.
6. Morton, K.L., et al., *School policies, programmes and facilities, and objectively measured sedentary time, LPA and MVPA: associations in secondary school and over the transition from primary to secondary school*. Int J Behav Nutr Phys Act, 2016. **13**: p. 54.
7. Morton, K.L., et al., *Engaging stakeholders and target groups in prioritising a public health intervention: the Creating Active School Environments (CASE) online Delphi study*. BMJ Open, 2017. **7**(1): p. e013340.
8. Bartholomew, J.B. and E.M. Jowers, *Physically active academic lessons in elementary children*. Prev Med, 2011. **52 Suppl 1**: p. S51-4.
9. Martin, R. and E.M. Murtagh, *Effect of Active Lessons on Physical Activity, Academic, and Health Outcomes: A Systematic Review*. Res Q Exerc Sport, 2017. **88**(2): p. 149-168.
10. Norris, E., et al., *Physically active lessons as physical activity and educational interventions: a systematic review of methods and results*. Prev Med, 2015. **72**: p. 116-25.
11. Howie, E.K., R.D. Newman-Norlund, and R.R. Pate, *Smiles count but minutes matter: responses to classroom exercise breaks*. Am J Health Behav, 2014. **38**(5): p. 681-9.
12. Daly-Smith, A.J., et al., *Systematic review of acute physically active learning and classroom movement breaks on children's physical activity, cognition, academic performance and classroom behaviour: understanding critical design features*. BMJ Open Sport Exerc Med, 2018. **4**(1): p. e000341.
13. Helgeson, J., *The impact of physical activity on academics in English classes at the junior high school level*. 2013, Northcentral University: ProQuest LLC. p. 188.
14. Cothran, D.J., P.H. Kulinna, and A.C. Garn, *Classroom teachers and physical activity integration*. Teaching and Teacher Education, 2010. **26**(7): p. 1381-1388.
15. Mullender-Wijnsma, M.J., et al., *Improving academic performance of school-age children by physical activity in the classroom: 1-year program evaluation*. J Sch Health, 2015. **85**(6): p. 365-71.
16. Gibson, C.A., et al., *Physical activity across the curriculum: year one process evaluation results*. Int J Behav Nutr Phys Act, 2008. **5**: p. 36.
17. Edmundson, E.W., et al., *CATCH: classroom process evaluation in a multicenter trial*. Health Educ Q, 1994. **Suppl 2**: p. S27-s50.
18. Webster, C.A., H. Erwin, and M. Parks, *Relationships Between and Changes in Preservice Classroom Teachers' Efficacy Beliefs, Willingness to Integrate Movement, and Perceived Barriers to Movement Integration*. Physical Educator, 2013. **70**(3): p. 314-335.
19. Brown, H.E., et al., *A cluster randomised controlled trial to evaluate the effectiveness and cost-effectiveness of the GoActive intervention to increase physical activity among adolescents aged 13-14 years*. BMJ Open, 2017. **7**(9): p. e014419.
20. Sudlow, C., et al., *UK biobank: an open access resource for identifying the causes of a wide range of complex diseases of middle and old age*. PLoS Med, 2015. **12**(3): p. e1001779.
21. Phillips, L.R., G. Parfitt, and A.V. Rowlands, *Calibration of the GENEA accelerometer for assessment of physical activity intensity in children*. J Sci Med Sport, 2013. **16**(2): p. 124-8.

- 1  
2  
3 22. Rosenberger, M.E., et al., *Estimating activity and sedentary behavior from an accelerometer on the hip or wrist*. *Med Sci Sports Exerc*, 2013. **45**(5): p. 964-75.
- 4 23. Dossegger, A., et al., *Reactivity to accelerometer measurement of children and adolescents*. *Med Sci Sports Exerc*, 2014. **46**(6): p. 1140-6.
- 5 24. Haapala, H.L., et al., *Changes in physical activity and sedentary time in the Finnish Schools on the Move program: a quasi-experimental study*. *Scand J Med Sci Sports*, 2017. **27**(11): p. 1442-1453.
- 6 25. Yli-Piipari, S., et al., *Objectively Measured School Day Physical Activity Among Elementary Students in the United States and Finland*. *J Phys Act Health*, 2016. **13**(4): p. 440-6.
- 7 26. Lau, E.Y., et al., *Changes in Physical Activity in the School, Afterschool, and Evening Periods During the Transition From Elementary to Middle School*. *J Sch Health*, 2017. **87**(7): p. 531-537.
- 8 27. White, T., et al., *Estimation of Physical Activity Energy Expenditure during Free-Living from Wrist Accelerometry in UK Adults*. *PLoS One*, 2016. **11**(12): p. e0167472.
- 9 28. Janssen, I. and A.G. Leblanc, *Systematic review of the health benefits of physical activity and fitness in school-aged children and youth*. *Int J Behav Nutr Phys Act*, 2010. **7**: p. 40.
- 10 29. Thompson, E.R., *Development and Validation of an Internationally Reliable Short-Form of the Positive and Negative Affect Schedule (PANAS)*. *Journal of Cross-Cultural Psychology*, 2016. **38**(2): p. 227-242.
- 11 30. Midgley, C., et al., *Manual for the patterns of adaptive learning scales*. 2000, University of Michigan: Michigan, US.
- 12 31. Jones, R.D., *Student engagement. Teacher handbook*. 2009, Center for Leadership in Education: New York.
- 13 32. Furber, G. and L. Segal, *The validity of the Child Health Utility instrument (CHU9D) as a routine outcome measure for use in child and adolescent mental health services*. *Health Qual Life Outcomes*, 2015. **13**: p. 22.
- 14 33. Hintze, J.M., V.R. J., and E.S. Shapiro, *Best practices in the systematic direct observation of student behaviour*. 2002. **IV**(4): p. 993-1006.
- 15 34. Johnson, A.H., S.M. Chafouleas, and A.M. Briesch, *Dependability of data derived from time sampling methods with multiple observation targets*. *Sch Psychol Q*, 2017. **32**(1): p. 22-34.
- 16 35. Mahar, M.T., et al., *Effects of a classroom-based program on physical activity and on-task behavior*. *Med Sci Sports Exerc*, 2006. **38**(12): p. 2086-94.
- 17 36. Nathan, N., et al., *Barriers and facilitators to the implementation of physical activity policies in schools: A systematic review*. *Prev Med*, 2018. **107**: p. 45-53.
- 18 37. Dyrstad, S.M., et al., *Physically active academic lessons: acceptance, barriers and facilitators for implementation*. *BMC Public Health*, 2018. **18**(1): p. 322.
- 19 38. Atkin, A.J., et al., *Seasonal Variation in Children's Physical Activity and Sedentary Time*. *Med Sci Sports Exerc*, 2016. **48**(3): p. 449-56.
- 20 39. Verma, S., et al., *Highs and lows: Naturalistic changes in mood and everyday hassles over school and vacation periods in adolescents*. *J Adolesc*, 2017. **61**: p. 17-21.
- 21 40. Eminson, K., et al., *How does age affect the relationship between weight and health utility during the middle years of childhood?* *Qual Life Res*, 2018.
- 22 41. Lee, A., *Health-promoting schools: evidence for a holistic approach to promoting health and improving health literacy*. *Appl Health Econ Health Policy*, 2009. **7**(1): p. 11-7.
- 23 42. Committee on Physical Activity Physical Education in the School. *Educating the Student Body: Taking Physical Activity and Physical Education to School*, ed. H.W. Kohl, III and H.D. Cook. 2013, Washington (DC): National Academies Press (US).
- 24 43. Hankonen, N., et al., *Randomised controlled feasibility study of a school-based multi-level intervention to increase physical activity and decrease sedentary behaviour among vocational school students*. *Int J Behav Nutr Phys Act*, 2017. **14**(1): p. 37.

- 1  
2  
3 44. Oliver, M., G. Schofield, and E. McEvoy, *An integrated curriculum approach to increasing habitual physical activity in children: a feasibility study*. J Sch Health, 2006. **76**(2): p. 74-9.
- 4 45. Erwin, H.E., et al., *Promoting children's health through physically active math classes: a pilot study*. Health Promot Pract, 2011. **12**(2): p. 244-51.
- 6 46. Reznik, M., et al., *A classroom-based physical activity intervention for urban kindergarten and first-grade students: a feasibility study*. Child Obes, 2015. **11**(3): p. 314-24.
- 8 47. Li, Y.P., et al., *Report on childhood obesity in China (8): effects and sustainability of physical activity intervention on body composition of Chinese youth*. Biomed Environ Sci, 2010. **23**(3): p. 180-7.
- 10 48. Donnelly, J.E., et al., *Physical Activity Across the Curriculum (PAAC): a randomized controlled trial to promote physical activity and diminish overweight and obesity in elementary school children*. Prev Med, 2009. **49**(4): p. 336-41.
- 12 49. Riley, N., et al., *Outcomes and process evaluation of a programme integrating physical activity into the primary school mathematics curriculum: The EASY Minds pilot randomised controlled trial*. J Sci Med Sport, 2015. **18**(6): p. 656-61.
- 14 50. Miller, G.F., et al., *Evaluation of Let's Move! active schools activation grants*. Prev Med, 2018. **108**: p. 36-40.
- 16 51. Jago, R. and S.J. Sebire, *Publishing pilot and feasibility evaluations of behavioural interventions: implications for preventive medicine*. Prev Med, 2012. **55**(6): p. 548-9.
- 18 52. Benjamin Neelon, S.E., K.R. Hesketh, and E.M. van Sluijs, *Will Physically Active Lessons Improve Academic Achievement for All or Widen the Achievement Gap?* Pediatrics, 2016. **137**(3): p. e20154137.
- 20  
21  
22  
23  
24  
25  
26  
27  
28  
29  
30  
31  
32  
33  
34  
35  
36  
37  
38  
39  
40  
41  
42  
43  
44  
45  
46  
47  
48  
49  
50  
51  
52  
53  
54  
55  
56  
57  
58  
59  
60

1  
2  
3  
4  
5  
6  
7  
8  
9  
10  
11  
12  
13  
14  
15  
16  
17  
18  
19  
20  
21  
22  
23  
24  
25  
26  
27  
28  
29  
30  
31  
32  
33  
34  
35  
36  
37  
38  
39  
40  
41  
42  
43  
44  
45  
46  
47

**Table 1. Outline of the PAL training programme and timeline of evaluation measures.**

|                                         | <b>Week 0<br/>Baseline Measures</b>                                                                                                                                                                                                             | <b>Week 1</b>                                                                                                                                                                                                                                                                                                                                                                                | <b>Week 4</b>                                                                                                                                                                                                                                                                                                                                             | <b>Week 12<br/>Follow-Up Measures</b>                                                                                                                                                                                                                                                                                                                              |
|-----------------------------------------|-------------------------------------------------------------------------------------------------------------------------------------------------------------------------------------------------------------------------------------------------|----------------------------------------------------------------------------------------------------------------------------------------------------------------------------------------------------------------------------------------------------------------------------------------------------------------------------------------------------------------------------------------------|-----------------------------------------------------------------------------------------------------------------------------------------------------------------------------------------------------------------------------------------------------------------------------------------------------------------------------------------------------------|--------------------------------------------------------------------------------------------------------------------------------------------------------------------------------------------------------------------------------------------------------------------------------------------------------------------------------------------------------------------|
| <b>Feasibility Study</b>                | <b>Students:</b> <ul style="list-style-type: none"> <li>• Anthropometry</li> <li>• Questionnaire</li> <li>• Accelerometry</li> <li>• Time-on-Task</li> </ul> <b>Teachers:</b> <ul style="list-style-type: none"> <li>• Questionnaire</li> </ul> | <b>Training session 1 (2 hours)</b><br><b>30 minutes:</b> Introduction to active learning<br><b>40 minutes:</b> Split group in half: <ul style="list-style-type: none"> <li>• Half stay in classroom and review classroom-based PAL strategies</li> <li>• Half go outside and review outdoor PAL strategies</li> </ul> <b>40 minutes:</b> Groups switch<br><b>10 minutes:</b> Final comments | <b>Training session 2 (2 hours)</b><br><b>30 minutes:</b> Sharing PAL experiences<br><b>30 minutes:</b> Outdoor PAL examples<br><b>15 minutes:</b> Indoor PAL examples<br><b>15 minutes:</b> Discussion of intervention expectations<br><b>10 minutes:</b> Post-training questionnaire                                                                    | <b>Students:</b> <ul style="list-style-type: none"> <li>• Questionnaire</li> <li>• Accelerometry</li> <li>• Time-on-Task</li> <li>• Focus groups</li> </ul> <b>Teachers:</b> <ul style="list-style-type: none"> <li>• Questionnaire</li> <li>• Focus group</li> </ul> <b>Senior Leadership Team:</b> <ul style="list-style-type: none"> <li>• Interview</li> </ul> |
| <b>Pilot Study: Intervention School</b> | <i>Same as for feasibility study baseline measures</i>                                                                                                                                                                                          | <i>Same as for feasibility study training session 1</i>                                                                                                                                                                                                                                                                                                                                      | <b>Training session 2 (2 hours)</b><br><b>45 minutes:</b> Split group in half: <ul style="list-style-type: none"> <li>• Half review indoor PAL strategies</li> <li>• Half review outdoor PAL strategies</li> </ul> <b>45 minutes:</b> Groups switch<br><b>10 minutes:</b> Whole-group outdoor activity.<br><b>10 minutes:</b> Post-training questionnaire | <i>Same as for feasibility study follow-up measures</i>                                                                                                                                                                                                                                                                                                            |
| <b>Pilot Study: Control School</b>      | <i>Same as for feasibility study baseline measures</i>                                                                                                                                                                                          | No training session                                                                                                                                                                                                                                                                                                                                                                          | No training session                                                                                                                                                                                                                                                                                                                                       | <b>Students:</b> <ul style="list-style-type: none"> <li>• Questionnaire</li> <li>• Accelerometry</li> <li>• Time-on-Task</li> </ul>                                                                                                                                                                                                                                |

**Table 2. Baseline and follow-up values for primary and secondary outcomes; mean (SD).**

|                                    | <b>N</b> | <b>Baseline</b> | <b>Follow-Up</b> | <b>Mean Difference<br/>(95% C.I.)</b> |
|------------------------------------|----------|-----------------|------------------|---------------------------------------|
| Sedentary activity (minutes)       | 76       | 237.4 (26.4)    | 246.1 (27.6)     | 8.7 (3.8,13.7)                        |
| Light activity (minutes)           | 76       | 139.8 (21.8)    | 131.7 (22.6)     | -8.1 (-12.4,-3.8)                     |
| Moderate activity (minutes)        | 76       | 10.8 (6.0)      | 10.3 (5.8)       | -0.6 (-1.4,0.3)                       |
| Vigorous activity (minutes)        | 76       | 2.0 (2.0)       | 1.9 (1.8)        | -0.1 (-0.4,0.3)                       |
| Time-on-task (% intervals on-task) | 11       | 66.1            | -                | -                                     |
| Academic Efficacy (score 1-5)      | 85       | 3.51 (0.80)     | 3.63 (0.83)      | -                                     |
| Disruptive Behaviour (score 1-5)   | 82       | 1.90 (0.95)     | 1.94 (0.98)      | -                                     |
| CHU-9D (score 0.33-1.0)            | 89       | 0.86 (0.10)     | 0.84 (0.10)      | -                                     |
| Positive Affect (score 1-5)        | 81       | 17.35 (3.44)    | 16.16 (3.36)     | -                                     |
| Negative Affect (score 1-5)        | 84       | 10.55 (3.28)    | 10.71 (3.48)     | -                                     |

Length of school day = 390 minutes

**Table 3. Activity intensity during 60-minute PAL at follow-up and the equivalent lesson at baseline (excluding P.E. and drama); mean (SD).**

|                              | <b>N</b> | <b>Baseline</b> | <b>Follow-Up</b> | <b>Mean Difference (95% C.I.)</b> |
|------------------------------|----------|-----------------|------------------|-----------------------------------|
| Sedentary activity (minutes) | 310      | 41.1 (8.4)      | 42.1 (8.6)       | 1.0 (-0.1,2.1)                    |
| Light activity (minutes)     | 310      | 17.9 (7.6)      | 16.9 (7.8)       | -1.1 (-2.1,0)                     |
| Moderate activity (minutes)  | 310      | 0.8 (1.0)       | 0.9 (1.0)        | 0 (-0.1,0.2)                      |
| Vigorous activity (minutes)  | 310      | 0.2 (1.1)       | 0.2 (0.6)        | 0 (-0.1,0.1)                      |

For peer review only

**Table 4. Baseline and follow-up values for primary and secondary outcomes; mean (SD).**

|                                    | Control School <sup>a</sup> |              |              |                            | Intervention School <sup>a</sup> |              |              |                            |
|------------------------------------|-----------------------------|--------------|--------------|----------------------------|----------------------------------|--------------|--------------|----------------------------|
|                                    | N                           | Baseline     | Follow-Up    | Mean Difference (95% C.I.) | N                                | Baseline     | Follow-Up    | Mean Difference (95% C.I.) |
| Sedentary activity (minutes)       | 74                          | 217.0 (32.4) | 222.1 (36.2) | 5.1 (-1.3,11.5)            | 96                               | 236.4 (31.8) | 237.7 (40.6) | 1.3 (-6.2,8.7)             |
| Light activity (minutes)           | 74                          | 140.5 (26.0) | 136.6 (31.9) | -4.0 (-10.1,2.2)           | 96                               | 129.0 (26.8) | 124.8 (31.2) | -4.2 (-10.5,2.1)           |
| Moderate activity (minutes)        | 74                          | 16.2 (7.5)   | 14.2 (7.8)   | -2.0 (-3.2,-0.8)           | 96                               | 11.1 (6.3)   | 10.1 (6.3)   | -1.1 (-2.0,-0.1)           |
| Vigorous activity (minutes)        | 74                          | 5.5 (3.9)    | 4.7 (3.5)    | -0.8 (-1.4,-0.2)           | 96                               | 3.1 (3.0)    | 3.0 (2.9)    | -0.1 (-0.6,0.4)            |
| Time-on-task (% intervals on-task) | 28 <sup>b</sup>             | 73.7         | 56.6         | -                          | 27 <sup>c</sup>                  | 79.1         | 77.5         | -                          |
| Academic Efficacy (score 1-5)      | 98                          | 3.41 (0.71)  | 3.32 (0.71)  | -                          | 107                              | 3.76 (0.64)  | 3.71 (0.76)  | -                          |
| Disruptive Behaviour (score 1-5)   | 98                          | 2.34 (1.23)  | 2.47 (1.19)  | -                          | 107                              | 1.94 (0.94)  | 2.04 (1.01)  | -                          |
| CHU-9D (score 0.33-1.0)            | 97                          | 0.84 (0.10)  | 0.84 (0.09)  | -                          | 106                              | 0.87 (0.09)  | 0.85 (0.10)  | -                          |
| Positive Affect (score 1-5)        | 98                          | 15.95 (3.33) | 16.08 (3.53) | -                          | 107                              | 17.80 (3.10) | 17.54 (3.74) | -                          |
| Negative Affect (score 1-5)        | 98                          | 10.03 (3.30) | 9.87 (3.14)  | -                          | 106                              | 10.12 (3.47) | 9.95 (3.06)  | -                          |

<sup>a</sup> Length of school day varies: control school = 380 minutes, intervention school = 400 minutes

<sup>b</sup> 14 students observed at baseline across 4 classes (all non-active lessons) and 14 students observed at follow-up across 4 classes (all non-active lessons). Students observed at baseline were different from students observed at follow-up.

<sup>c</sup> 14 students observed at baseline across 4 classes (all non-active lessons) and 13 students observed at follow-up across 4 classes (3 active lessons, 1 non-active lesson). Students observed at baseline were different from students observed at follow-up.



## Text Box 1.

*"I really enjoyed them (active lessons), they (the students) enjoyed them as well, they seemed to get a lot out of them...it was good fun, it was nothing really any different to what I was normally doing, just with a few added extras"* (Maths teacher, female).

*"I thought they (the students) would enjoy going outside... I had high hopes for that but it was a Friday afternoon and I don't think they were ready for it... they were causing disruption, they tried to walk off"* (English teacher, female).

*"we concentrated more because it was more fun than just sitting around"* (Year-7, male), and *"when you're sitting down you can get quite bored and get easily distracted whereas if you're moving about you've actually got something to do"* (Year-7, female).

For peer review only

Figure 1. Logic model of how a PAL intervention may result in changes in student's sedentary activity (SED).

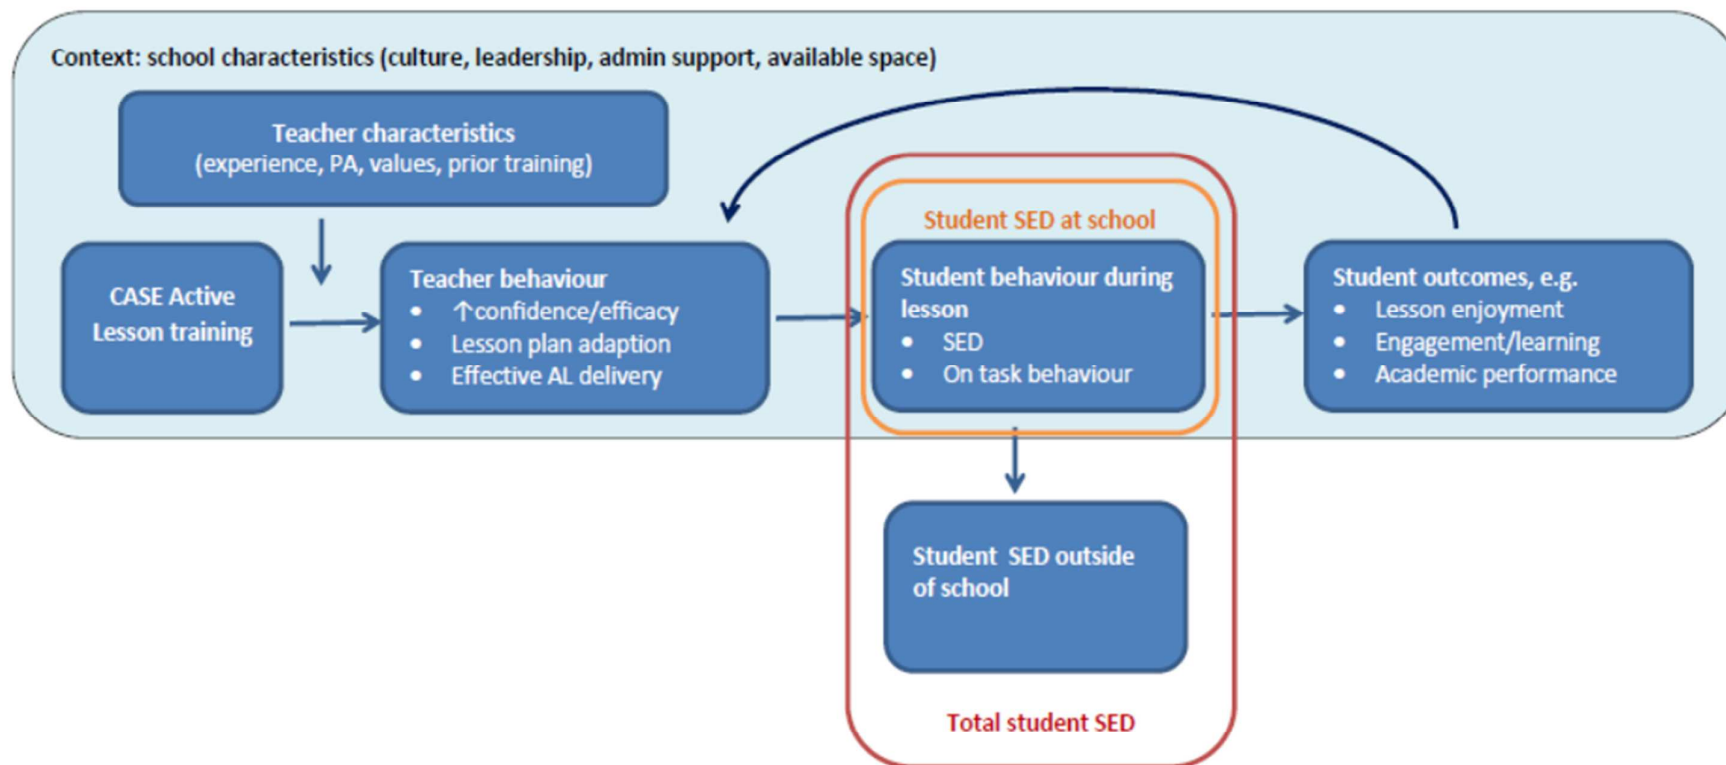

Figure 2. CONSORT flow chart of pilot study participant recruitment (schools and students).

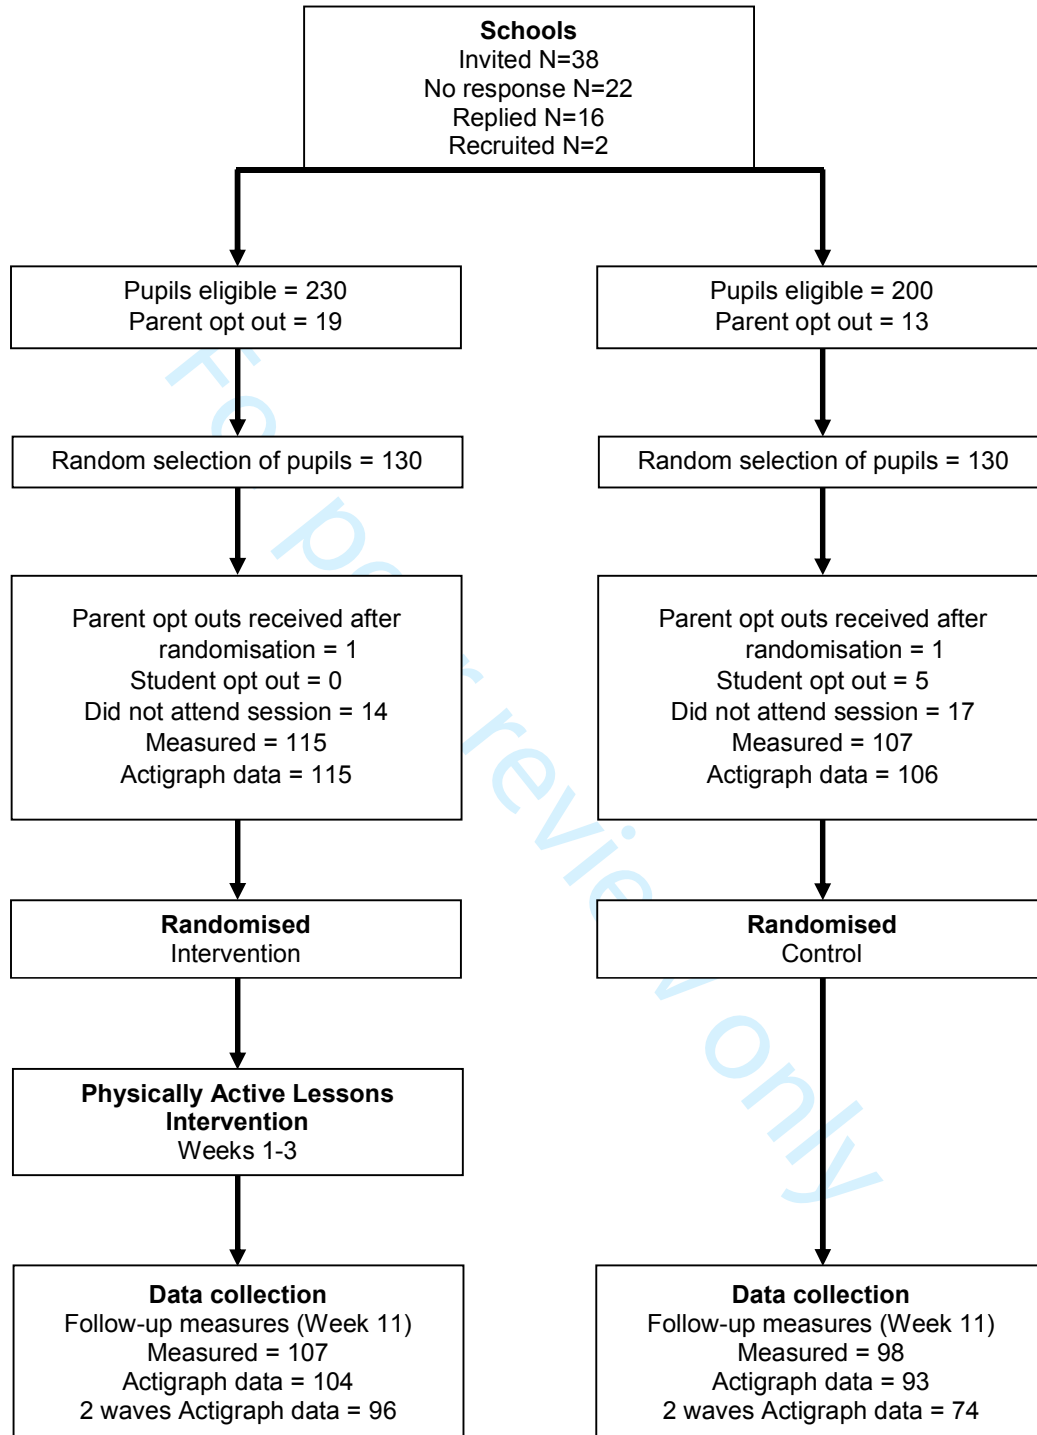

**Supplementary Table 1.** Descriptive, recruitment and retention statistics of student participants in feasibility and pilot studies.

|                                         | Feasibility Study | Pilot Study<br>– Control | Pilot Study<br>– Intervention |
|-----------------------------------------|-------------------|--------------------------|-------------------------------|
| N schools                               | 1                 | 1                        | 1                             |
| N students invited                      | 360               | 200                      | 230                           |
| N parent opt out                        | 25                | 13                       | 19                            |
| N students randomly selected            | 120*              | 130*                     | 130*                          |
| N student non assent                    | 7                 | 5                        | 0                             |
| N student non attendance                | 11                | 17                       | 14                            |
| N students assented                     | 99                | 107                      | 115                           |
| N two time points                       | 91                | 98                       | 107                           |
| N accepted monitor at two time points   | 91                | 93                       | 104                           |
| N with sufficient PA at two time points | 76                | 74                       | 96                            |
| Age (years)                             | 13.0 (1.1)        | 13.1 (0.6)               | 12.7 (1.0)                    |
| Sex: N (% male)                         | 51 (52)           | 53 (50)                  | 58 (50)                       |
| Height (cm)                             | 158.6 (8.7)       | 159.6 (8.9)              | 156.2 (9.8)                   |
| Weight (kg)                             | 51.9 (14.9)       | 54.1 (13.7)              | 48.1 (10.4)                   |
| BMI percentile                          | 56.8 (30.8)       | 63.2 (29.4)              | 57.6 (28.2)                   |
| % overweight/obese                      | 26.6              | 29.0                     | 19.1                          |

PA: physical activity

\*After random selection, a small number of parent opt-out replies were received for students that had been randomly selected for evaluation measures (feasibility study = 3, pilot control school = 1, pilot intervention school = 1), as such, the number of students randomly selected who were eligible to assent were: feasibility study = 117, pilot control school = 129, pilot intervention school = 129.

**Supplementary Table 2.** Descriptive statistics of teacher participants in feasibility and pilot studies.

|                                             | <b>Feasibility Study</b> | <b>Pilot Study – Control</b> | <b>Pilot Study – Intervention</b> |
|---------------------------------------------|--------------------------|------------------------------|-----------------------------------|
| <b>N teachers invited</b>                   | 15                       | 32                           | 36                                |
| <b>N teachers assented</b>                  | 13                       | 32                           | 36 <sup>a</sup>                   |
| <b>Age Category: N (%)</b>                  |                          |                              |                                   |
| 18-24 years                                 | 1 (17)                   | 6 (19)                       | 1 (3)                             |
| 25-34 years                                 | 2 (33)                   | 7 (22)                       | 5 (14)                            |
| 35-44 years                                 | 2 (33)                   | 9 (28)                       | 7 (19)                            |
| 44-45 years                                 | 1 (17)                   | 9 (28)                       | 11 (31)                           |
| 55-64 years                                 | 0                        | 1 (3)                        | 3 (8)                             |
| 65 years +                                  | 0                        | 0                            | 0                                 |
| <b>N (%) male</b>                           | 2 (33)                   | 10 (31)                      | 10 (28)                           |
| <b>Teaching Experience: N (%)</b>           |                          |                              |                                   |
| < 1 year                                    | 1 (17)                   | 8 (25)                       | 0                                 |
| 2-5 years                                   | 2 (33)                   | 7 (22)                       | 6 (17)                            |
| 6-10 years                                  | 2 (33)                   | 5 (16)                       | 7 (19)                            |
| >10 years                                   | 0                        | 10 (31)                      | 13 (36)                           |
| <b>Current active lesson delivery N (%)</b> |                          |                              |                                   |
| Never/rarely                                | 3 (50)                   | 5 (16)                       | 5 (14)                            |
| 1-2 times / month                           | 2 (33)                   | 6 (19)                       | 7 (19)                            |
| 1-2 times / week                            | 1 (17)                   | 8 (25)                       | 5 (14)                            |
| 3-4 times / week                            | 0                        | 6 (19)                       | 3 (8)                             |
| > once per day                              | 0                        | 6 (19)                       | 6 (17)                            |

<sup>a</sup>27 teachers attended the research team's study introduction and completed baseline questionnaires. A further 9 teachers consented at training session 1 or 2 and did not provide baseline data.

**Supplementary Table 3.** Teacher feedback on the PAL training programme; mean (SD).

|                                                                                                 | Feasibility Study (n=9) | Pilot Study – Intervention School |                                              |                                              |
|-------------------------------------------------------------------------------------------------|-------------------------|-----------------------------------|----------------------------------------------|----------------------------------------------|
|                                                                                                 |                         | Whole Group (n=33)                | Baseline PAL delivery < once per week (n=11) | Baseline PAL delivery ≥ once per week (n=14) |
| Usefulness of training in preparing you to deliver PAL<br>(1=not useful, 7=very useful)         | 5.3 (0.5)               | 3.1 (1.4)                         | 3.9 (1.6)                                    | 2.5 (1.1)                                    |
| Appropriateness of depth and scope of training<br>(1=not appropriate, 7=very appropriate)       | 5.2 (0.7)               | 3.1 (1.4)                         | 3.6 (1.6)                                    | 2.7 (1.2)                                    |
| Appropriateness of programme materials and resources<br>(1=not appropriate, 7=very appropriate) | 5.6 (1.3)               | 2.8 (1.4)                         | 3.5 (1.6)                                    | 2.4 (1.2)                                    |
| Clarity of program materials and resources<br>(1=not clear, 7=very clear)                       | 6.0 (0.7)               | 3.7 (1.2)                         | 4.4 (1.3)                                    | 3.4 (1.1)                                    |
| Relevance of training for your lessons<br>(1=not relevant, 7=very relevant)                     | 5.3 (1.1)               | 2.9 (1.4)                         | 3.6 (1.4)                                    | 2.4 (1.4)                                    |
| Would you recommend the training to other teachers?<br>N (%) yes                                | 9 (100)                 | 15 (45)                           | 7 (64%)                                      | 4 (29%)                                      |

### Outdoor Active Lesson Examples

1. <https://www.ltl.org.uk/pdf/Natural-Equations-2018-COMplete1518623029.pdf>
2. <https://www.ltl.org.uk/pdf/Fires-and-Cooking-Activity1421850222.pdf>

### Indoor Active Lesson Examples

#### A. Jigsaw

*What is it?* The jigsaw is a cooperative learning strategy (one of several) whereby, as with a jigsaw puzzle, each piece (each student's part) is essential for the complete picture (full understanding of the final product). Here, if each student's part is essential then arguably, each student is essential!

*Implications for classroom layout:* There is minimal impact on classroom layout. Desk should be arranged together so students can sit together in small groups and be able to move between groups.

*How does it work?*

1. Divide students into 5 or 6-person jigsaw groups. Ideally these groups should be diverse in terms of gender, race/ethnicity and ability.
2. These groups are the 'Home teams'. In each home team, each team member should be given a letter (e.g. A, B, C etc.)
3. Team members then join their **Jigsaw team** e.g. all the A's, B's etc. get together. This will require them moving to their jigsaw teams. These jigsaw teams are responsible for discussing and understanding a pre-determined aspect or answering a particular task. For instance, a reading may be divided into several parts with each jigsaw team taking one of those parts.
4. As a teacher, you can move between each jigsaw team to ensure they are addressing the task in its entirety and the whole jigsaw team develops an understanding of it.

- 1  
2  
3 5. Jigsaw teams then return to back to their home teams to discuss what was learnt in the  
4 jigsaw team. **Each student will present her or his segment to the group** so that all learn  
5  
6 from each other.  
7  
8

9  
10 *Benefits*

- 11  
12
  - 13 • Learn a lot of material quickly
  - 14 • Students are held individually accountable for their learning
  - 15 • It helps to maximise student collaboration
  - 16 • Encourages higher order and critical thinking skills.

17  
18  
19  
20  
21  
22  
23

24 B. Active Voting

25  
26  
27 *What is it?* This notion of Active Voting is useful for exploring differing and diverse opinions on  
28 particular issues. It can lead into a specific topic and gauge pupil understanding and critical thought  
29 of the issue in question. It requires pupils to adopt a view on the issue and identify a reason for the  
30 stance they take. Moreover, it will allow everyone to be heard, promoting student voice (even if  
31 they choose not to speak). To facilitate Active Voting, pupils need to be confronted with levels of  
32 ambiguity and grey areas, which helps them to see that opinions often have to be justified with  
33 informed knowledge of the matter under discussion.  
34  
35  
36  
37  
38  
39  
40

41  
42 *Implications for classroom layout:* Each of the four key statements will need to be positioned in one of  
43 corners of a room. These statements include: Strongly agree, agree, disagree, and strongly disagree.  
44 When an issue is raised, pupils will then move to stand/sit in the corner that best reflects their  
45 views and with those who share the same opinion/perspective.  
46  
47  
48  
49

50  
51 *How does it work?*

- 52  
53  
54 1. A range of issues (related to the content being delivered) should be read out in turn by the  
55 teacher.  
56  
57  
58  
59



- 1
- 2
- 3 2. Pupils are then given time to consider their opinion.
- 4
- 5 3. Pupils then move to the corner that best describes how they feel about what was read out.
- 6
- 7 Pupils should be reminded that there are no right or wrong answers.
- 8
- 9 4. What is read out (e.g. a particular statement) should aim to evoke a range of responses.
- 10
- 11 5. When pupils move to the corner that best represent their views on the statement, they
- 12
- 13 should be encouraged to explain why they feel that way with others in that group. General
- 14
- 15 perspectives can be obtained from all corners.
- 16
- 17 6. Teachers may wish to introduce subsidiary questions to draw out more complex issues and
- 18
- 19 to refine the initial statement/problem/issues being discussed.
- 20
- 21 7. Pupils are allowed to move during the discussion of each statement if issues arise that
- 22
- 23 challenge their original opinion.
- 24
- 25
- 26 8. If pupils do switch then they should be encouraged to explain why.
- 27

### 28 *Benefits*

29

30

31 Developing thinking and decision making skills

32

33

34

35

36

37

38

39

40

41

42

43

44

45

46

47

48

49

50

51

52

53

54

55

56

57

58

59

60

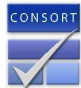

## CONSORT 2010 checklist of information to include when reporting a pilot or feasibility randomized trial in a journal or conference abstract

| Item               | Description                                                                                                 | Reported on line number |
|--------------------|-------------------------------------------------------------------------------------------------------------|-------------------------|
| Title              | Identification of study as randomised pilot or feasibility trial                                            | 1-2                     |
| Authors *          | Contact details for the corresponding author                                                                | 11                      |
| Trial design       | Description of pilot trial design (eg, parallel, cluster)                                                   | 22                      |
| Methods            |                                                                                                             |                         |
| Participants       | Eligibility criteria for participants and the settings where the pilot trial was conducted                  | 21                      |
| Interventions      | Interventions intended for each group                                                                       | 27-28                   |
| Objective          | Specific objectives of the pilot trial                                                                      | 18-20                   |
| Outcome            | Prespecified assessment or measurement to address the pilot trial objectives**                              | 29-33                   |
| Randomization      | How participants were allocated to interventions                                                            | 22                      |
| Blinding (masking) | Whether or not participants, care givers, and those assessing the outcomes were blinded to group assignment | 22-23                   |
| Results            |                                                                                                             |                         |
| Numbers randomized | Number of participants screened and randomised to each group for the pilot trial objectives**               | N/A                     |
| Recruitment        | Trial status†                                                                                               | N/A                     |
| Numbers analysed   | Number of participants analysed in each group for the pilot objectives**                                    | N/A                     |
| Outcome            | Results for the pilot objectives, including any expressions of uncertainty**                                | 34-39                   |
| Harms              | Important adverse events or side effects                                                                    | N/A                     |
| Conclusions        | General interpretation of the results of pilot trial and their implications for the future definitive trial | 40-42                   |
| Trial registration | Registration number for pilot trial and name of trial register                                              | 43                      |
| Funding            | Source of funding for pilot trial                                                                           | 44                      |

Citation: Eldridge SM, Chan CL, Campbell MJ, Bond CM, Hopewell S, Thabane L, et al. CONSORT 2010 statement: extension to randomised pilot and feasibility trials. *BMJ*. 2016;355.

*\*this item is specific to conference abstracts*

*\*\*Space permitting, list all pilot trial objectives and give the results for each. Otherwise, report those that are a priori agreed as the most important to the decision to proceed with the future definitive RCT.*

*†For conference abstracts.*

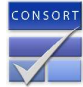

## CONSORT 2010 checklist of information to include when reporting a pilot or feasibility trial\*

| Section/Topic                    | Item No | Checklist item                                                                                                                                                                              | Reported on page No |
|----------------------------------|---------|---------------------------------------------------------------------------------------------------------------------------------------------------------------------------------------------|---------------------|
| <b>Title and abstract</b>        |         |                                                                                                                                                                                             |                     |
|                                  | 1a      | Identification as a pilot or feasibility randomised trial in the title                                                                                                                      | 1                   |
|                                  | 1b      | Structured summary of pilot trial design, methods, results, and conclusions (for specific guidance see CONSORT abstract extension for pilot trials)                                         | 2-3                 |
| <b>Introduction</b>              |         |                                                                                                                                                                                             |                     |
| Background and objectives        | 2a      | Scientific background and explanation of rationale for future definitive trial, and reasons for randomised pilot trial                                                                      | 4-5, 11-12          |
|                                  | 2b      | Specific objectives or research questions for pilot trial                                                                                                                                   | 11-12               |
| <b>Methods</b>                   |         |                                                                                                                                                                                             |                     |
| Trial design                     | 3a      | Description of pilot trial design (such as parallel, factorial) including allocation ratio                                                                                                  | 12                  |
|                                  | 3b      | Important changes to methods after pilot trial commencement (such as eligibility criteria), with reasons                                                                                    | 12                  |
| Participants                     | 4a      | Eligibility criteria for participants                                                                                                                                                       | 6, 12               |
|                                  | 4b      | Settings and locations where the data were collected                                                                                                                                        | 13                  |
|                                  | 4c      | How participants were identified and consented                                                                                                                                              | 6, 12               |
| Interventions                    | 5       | The interventions for each group with sufficient details to allow replication, including how and when they were actually administered                                                       | 26                  |
| Outcomes                         | 6a      | Completely defined prespecified assessments or measurements to address each pilot trial objective specified in 2b, including how and when they were assessed                                | 6-8, 26             |
|                                  | 6b      | Any changes to pilot trial assessments or measurements after the pilot trial commenced, with reasons                                                                                        | N/A                 |
|                                  | 6c      | If applicable, prespecified criteria used to judge whether, or how, to proceed with future definitive trial                                                                                 | N/A                 |
| Sample size                      | 7a      | Rationale for numbers in the pilot trial                                                                                                                                                    | 6, 12               |
|                                  | 7b      | When applicable, explanation of any interim analyses and stopping guidelines                                                                                                                | N/A                 |
| Randomisation:                   |         |                                                                                                                                                                                             |                     |
| Sequence generation              | 8a      | Method used to generate the random allocation sequence                                                                                                                                      | 12                  |
|                                  | 8b      | Type of randomisation(s); details of any restriction (such as blocking and block size)                                                                                                      | N/A                 |
| Allocation concealment mechanism | 9       | Mechanism used to implement the random allocation sequence (such as sequentially numbered containers), describing any steps taken to conceal the sequence until interventions were assigned | N/A                 |

|                                                      |     |                                                                                                                                                                                       |                     |
|------------------------------------------------------|-----|---------------------------------------------------------------------------------------------------------------------------------------------------------------------------------------|---------------------|
| Implementation                                       | 10  | Who generated the random allocation sequence, who enrolled participants, and who assigned participants to interventions                                                               | 12                  |
| Blinding                                             | 11a | If done, who was blinded after assignment to interventions (for example, participants, care providers, those assessing outcomes) and how                                              | 12                  |
|                                                      | 11b | If relevant, description of the similarity of interventions                                                                                                                           | N/A                 |
| Statistical methods                                  | 12  | Methods used to address each pilot trial objective whether qualitative or quantitative                                                                                                | 6-8, 13             |
| <b>Results</b>                                       |     |                                                                                                                                                                                       |                     |
| Participant flow (a diagram is strongly recommended) | 13a | For each group, the numbers of participants who were approached and/or assessed for eligibility, randomly assigned, received intended treatment, and were assessed for each objective | 12, Figure 2        |
|                                                      | 13b | For each group, losses and exclusions after randomisation, together with reasons                                                                                                      | Figure 2            |
| Recruitment                                          | 14a | Dates defining the periods of recruitment and follow-up                                                                                                                               | Figure 2            |
|                                                      | 14b | Why the pilot trial ended or was stopped                                                                                                                                              | N/A                 |
| Baseline data                                        | 15  | A table showing baseline demographic and clinical characteristics for each group                                                                                                      | Supp file 1, page 1 |
| Numbers analysed                                     | 16  | For each objective, number of participants (denominator) included in each analysis. If relevant, these numbers should be by randomised group                                          | 28-29, figure 2     |
| Outcomes and estimation                              | 17  | For each objective, results including expressions of uncertainty (such as 95% confidence interval) for any estimates. If relevant, these results should be by randomised group        | 28-29               |
| Ancillary analyses                                   | 18  | Results of any other analyses performed that could be used to inform the future definitive trial                                                                                      | N/A                 |
| Harms                                                | 19  | All important harms or unintended effects in each group (for specific guidance see CONSORT for harms)                                                                                 | N/A                 |
|                                                      | 19a | If relevant, other important unintended consequences                                                                                                                                  | N/A                 |
| <b>Discussion</b>                                    |     |                                                                                                                                                                                       |                     |
| Limitations                                          | 20  | Pilot trial limitations, addressing sources of potential bias and remaining uncertainty about feasibility                                                                             | 19-20               |
| Generalisability                                     | 21  | Generalisability (applicability) of pilot trial methods and findings to future definitive trial and other studies                                                                     | 19-20               |
| Interpretation                                       | 22  | Interpretation consistent with pilot trial objectives and findings, balancing potential benefits and harms, and considering other relevant evidence                                   | 17-20               |
|                                                      | 22a | Implications for progression from pilot to future definitive trial, including any proposed amendments                                                                                 | 20                  |
| <b>Other information</b>                             |     |                                                                                                                                                                                       |                     |
| Registration                                         | 23  | Registration number for pilot trial and name of trial registry                                                                                                                        | 5                   |
| Protocol                                             | 24  | Where the pilot trial protocol can be accessed, if available                                                                                                                          | 5                   |
| Funding                                              | 25  | Sources of funding and other support (such as supply of drugs), role of funders                                                                                                       | 21                  |
|                                                      | 26  | Ethical approval or approval by research review committee, confirmed with reference number                                                                                            | 5                   |

1  
2  
3  
4  
5  
6  
7  
8  
9  
10  
11  
12  
13  
14  
15  
16  
17  
18  
19  
20  
21  
22  
23  
24  
25  
26  
27  
28  
29  
30  
31  
32  
33  
34  
35  
36  
37  
38  
39  
40  
41  
42  
43  
44  
45  
46  
47

Citation: Eldridge SM, Chan CL, Campbell MJ, Bond CM, Hopewell S, Thabane L, et al. CONSORT 2010 statement: extension to randomised pilot and feasibility trials. BMJ. 2016;355.  
\*We strongly recommend reading this statement in conjunction with the CONSORT 2010, extension to randomised pilot and feasibility trials, Explanation and Elaboration for important clarifications on all the items. If relevant, we also recommend reading CONSORT extensions for cluster randomised trials, non-inferiority and equivalence trials, non-pharmacological treatments, herbal interventions, and pragmatic trials. Additional extensions are forthcoming: for those and for up to date references relevant to this checklist, see [www.consort-statement.org](http://www.consort-statement.org).

For peer review only

# BMJ Open

## Introducing physically active lessons in UK secondary schools: feasibility study and pilot cluster-randomised controlled trial

|                                 |                                                                                                                                                                                                                                                                                                                                                                                                                                                                                                                                                                                                                                                           |
|---------------------------------|-----------------------------------------------------------------------------------------------------------------------------------------------------------------------------------------------------------------------------------------------------------------------------------------------------------------------------------------------------------------------------------------------------------------------------------------------------------------------------------------------------------------------------------------------------------------------------------------------------------------------------------------------------------|
| Journal:                        | <i>BMJ Open</i>                                                                                                                                                                                                                                                                                                                                                                                                                                                                                                                                                                                                                                           |
| Manuscript ID                   | bmjopen-2018-025080.R1                                                                                                                                                                                                                                                                                                                                                                                                                                                                                                                                                                                                                                    |
| Article Type:                   | Research                                                                                                                                                                                                                                                                                                                                                                                                                                                                                                                                                                                                                                                  |
| Date Submitted by the Author:   | 14-Nov-2018                                                                                                                                                                                                                                                                                                                                                                                                                                                                                                                                                                                                                                               |
| Complete List of Authors:       | Gammon, Catherine; University of Cambridge, MRC Epidemiology Unit<br>Morton, Katie; University of Cambridge, MRC Epidemiology Unit<br>Atkin, Andrew; University of East Anglia Faculty of Medicine and Health Sciences; University of Cambridge, MRC Epidemiology Unit<br>Corder, Kirsten; University of Cambridge, MRC Epidemiology Unit<br>Daly-Smith, Andy; Leeds Beckett University<br>Quarmby, Thomas; Leeds Beckett University<br>Suhrccke, Marc; University of York Centre for Health Economics,<br>Turner, David; University of East Anglia, Public Health and Primary Care<br>van Sluijs, Esther; University of Cambridge, MRC Epidemiology Unit |
| <b>Primary Subject Heading</b>: | Epidemiology                                                                                                                                                                                                                                                                                                                                                                                                                                                                                                                                                                                                                                              |
| Secondary Subject Heading:      | Public health                                                                                                                                                                                                                                                                                                                                                                                                                                                                                                                                                                                                                                             |
| Keywords:                       | Active lessons, Movement integration, Physical activity, Sedentary time, School health                                                                                                                                                                                                                                                                                                                                                                                                                                                                                                                                                                    |
|                                 |                                                                                                                                                                                                                                                                                                                                                                                                                                                                                                                                                                                                                                                           |

SCHOLARONE™  
Manuscripts

1  
2  
3  
4 1 **Introducing physically active lessons in UK secondary schools: feasibility**  
5  
6  
7  
8 2 **study and pilot cluster-randomised controlled trial**  
9

10  
11  
12 3 Catherine Gammon<sup>1</sup>, Katie Morton<sup>1</sup>, Andrew J Atkin<sup>1,2</sup>, Kirsten Corder<sup>1</sup>, Andy Daly-  
13  
14  
15 4 Smith<sup>3</sup>, Thomas Quarmby<sup>3</sup>, Marc Suhrcke, David Turner<sup>2</sup>, Esther van Sluijs<sup>1\*</sup>

16  
17  
18  
19  
20 5 <sup>1</sup> MRC Epidemiology Unit and UKCRC Centre for Diet and Activity Research (CEDAR),  
21  
22  
23 6 University of Cambridge, Cambridge, UK

24  
25  
26  
27 7 <sup>2</sup> School of Health Sciences, University of East Anglia, Norwich, UK

28  
29  
30  
31 8 <sup>3</sup> Carnegie School of Sport, Leeds Beckett University, Leeds, UK

32  
33  
34  
35 9 <sup>4</sup> Centre for Health Economics, University of York, York, UK

36  
37  
38  
39 10

40  
41  
42 11 \* Corresponding author: Dr Esther van Sluijs ([ev234@medschl.cam.ac.uk](mailto:ev234@medschl.cam.ac.uk); 01223 769189)

43  
44  
45  
46 12 Address: UKCRC Centre for Diet and Activity Research (CEDAR), MRC Epidemiology Unit,

47  
48  
49 13 University of Cambridge School of Clinical Medicine, Box 285 Institute of Metabolic Science,

50  
51  
52 14 Cambridge Biomedical Campus, Cambridge, CB2 0QQ, UK

53  
54  
55  
56 15 **Keywords:** Active lessons, movement integration, physical activity, sedentary time, school

57  
58  
59  
60 16 health

1  
2  
3  
4  
5  
6  
7  
8  
9  
10  
11  
12  
13  
14  
15  
16  
17  
18  
19  
20  
21  
22  
23  
24  
25  
26  
27  
28  
29  
30  
31  
32  
33  
34  
35  
36  
37  
38  
39  
40  
41  
42  
43  
44  
45  
46  
47  
48  
49  
50  
51  
52  
53  
54  
55  
56  
57  
58  
59  
60

17 **Word count: 5,717**

For peer review only



1  
2  
3  
4 18 **Abstract**  
5  
6

7 19 **Objectives:** Assess feasibility, acceptability and costs of delivering a physically active lessons  
8  
9  
10 20 (PAL) training programme to secondary school teachers and explore preliminary effectiveness  
11  
12  
13  
14 21 for reducing pupils' sedentary time.  
15  
16

17 22 **Design and setting:** Secondary schools in East England; one school participated in a pre-post  
18  
19  
20 23 feasibility study, two in a pilot cluster-randomised controlled trial. In the pilot trial, blinding to  
21  
22  
23  
24 24 group assignment was not possible.  
25  
26

27 25 **Participants:** Across studies, 321 randomly selected students (51% male; mean age: 12.9  
28  
29  
30 26 years), 78 teachers (35% male) and two assistant head-teachers enrolled; 296(92%) students,  
31  
32  
33  
34 27 69(88%) teachers and two assistant head teachers completed the studies.  
35  
36  
37

38 28 **Intervention:** PAL training was delivered to teachers over two after-school sessions. Teachers  
39  
40  
41 29 were made aware of how to integrate movement into lessons; strategies included students  
42  
43  
44 30 collecting data from the environment for class activities, and completing activities posted on  
45  
46  
47  
48 31 classroom walls, instead of sitting at desks.  
49  
50

51 32 **Primary and secondary outcomes:** Quantitative and qualitative data were collected to assess  
52  
53  
54 33 feasibility and acceptability of PAL training and delivery. Outcomes were assessed at baseline  
55  
56  
57  
58 34 and ~8 weeks post-training; measures included accelerometer-assessed activity, self-  
59  
60

1  
2  
3  
4 35 reported well-being, and observations of time-on-task. Process evaluation was conducted at  
5  
6  
7 36 follow-up.  
8  
9

10 37 **Results:** In the feasibility study, teachers reported good acceptability of PAL training and mixed  
11  
12  
13 38 experiences of delivering PAL. In the pilot study, teachers' acceptability of training was lower  
14  
15  
16  
17 39 and teachers identified aspects of the training in need of review, including the outdoor PAL  
18  
19  
20 40 training and learning challenge of PAL strategies. In both studies, students and assistant head-  
21  
22  
23 41 teachers reported good acceptability of the intervention. Preliminary effectiveness for reducing  
24  
25  
26 42 students' sedentary time was not demonstrated in either study.  
27  
28  
29

30 43 **Conclusions:** No evidence of preliminary effectiveness on the primary outcome and mixed  
31  
32  
33 44 reports of teachers' acceptability of PAL training suggest the need to review the training. The  
34  
35  
36 45 results do not support continuation of research with the current intervention.  
37  
38  
39

40 46 **Trial registration:** ISRCTN registry; ISRCTN38409550.  
41  
42  
43

44 47 **Funding:** Department of Health Policy Research Programme (PR-R5-0213-25001).  
45  
46  
47  
48  
49

50  
51  
52 49 **Article Summary**  
53  
54  
55

56 50 **Strength and limitations of this study**  
57  
58  
59  
60

- 1  
2  
3  
4 51 • We completed thorough feasibility and pilot testing work to inform the decision of whether  
5  
6  
7 52 to progress with the current intervention and its evaluation.  
8  
9  
10 53 • We collected quantitative and qualitative data which provided valuable information on  
11  
12  
13 54 contextual influences and allowed us to address research questions more  
14  
15  
16 55 comprehensively.  
17  
18  
19 56 • We were unable to collect all planned follow-up measures from teachers and students in  
20  
21  
22 57 feasibility study, including teacher follow-up questionnaires and class observations of time-  
23  
24  
25  
26 58 on-task.  
27  
28  
29 59 • We did not carry out longer-term follow-up measures of teacher acceptability and  
30  
31  
32 60 physically active lesson delivery (i.e., beyond ~8 weeks post-training); longer follow-up  
33  
34  
35 61 would have provided an indication of the sustainability of the intervention.  
36  
37  
38  
39  
40  
41  
42  
43  
44  
45  
46  
47  
48  
49  
50  
51  
52  
53  
54  
55  
56  
57  
58  
59  
60

## 62 INTRODUCTION

63 Globally, most adolescents (~80%) do not achieve government-recommended physical  
64 activity guidelines[1] and engage in high levels of sedentary behaviour[2]. As such,  
65 interventions are needed to support youth in achieving a healthy activity profile.  
66 Secondary/high schools present an opportunity for the implementation of activity interventions,  
67 as during school hours activity is lower and sedentary time is higher than during other  
68 segments of an adolescent's week[3, 4].

69 The Creating Active School Environments (CASE) project is a three-year research programme  
70 funded by the UK Department of Health Policy Research Programme. CASE aims to identify  
71 environmental strategies to help adolescents move more and sit less during school hours.  
72 Initial phases of CASE involved a systematic literature review[5] and secondary data  
73 analysis[6] to identify promising secondary school-based activity interventions. Morton and  
74 colleagues (2017) subsequently completed a Delphi study, involving stakeholders in the  
75 prioritisation of interventions. Physically active lessons (PAL) were perceived to be the most  
76 feasible, acceptable and cost-effective intervention for secondary school settings[7]; these  
77 results informed the final, feasibility and pilot-testing phase of CASE.

78 PAL are a pedagogical approach whereby activity supports the delivery of academic  
79 material[8]. During PAL, movement is integrated into teaching and as such, PAL are distinct

1  
2  
3  
4 80 from 'brain/movement breaks', when activity is separate from learning. Evidence from primary  
5  
6  
7 81 schools indicates that PAL can improve physical activity, academic achievement and lesson  
8  
9  
10 82 enjoyment[9-12]. To our knowledge, only two studies have trialled the use of PAL among  
11  
12  
13 83 adolescents[13, 14]. Helgeson (2013) reported no influence of the 'Energizers' PAL  
14  
15  
16 84 programme on reading comprehension scores among junior high school students and did not  
17  
18  
19 85 explore activity levels as a primary outcome[13]. Cothran and colleagues (2010) reported on  
20  
21  
22 86 primary and secondary/high school teachers' experiences of a one-year movement integration  
23  
24  
25  
26 87 intervention. Compared to primary school teachers, secondary teachers faced different  
27  
28  
29 88 challenges when attempting to integrate activity into lessons, in particular standardised testing  
30  
31  
32 89 pressures and students not staying with one teacher all day (as typically is the case in primary  
33  
34  
35 90 schools)[14]. Cothran and colleagues did not measure student activity behaviours as an  
36  
37  
38 91 intervention outcome[14]. The positive effects of PAL reported for primary students suggest  
39  
40  
41  
42 92 there is value in exploring if secondary students can experience similar benefits. Given the  
43  
44  
45 93 organisational and environmental differences between primary and secondary schools, it is  
46  
47  
48 94 important to conduct high quality feasibility and pilot testing of secondary school PAL  
49  
50  
51 95 interventions.

52  
53  
54  
55 96 A PAL training programme for secondary school teachers was tested in a feasibility study and  
56  
57  
58 97 a cluster-randomised controlled pilot study. The studies aimed to explore the feasibility,  
59  
60

1  
2  
3 98 acceptability, costs, and preliminary effectiveness of a PAL training programme for secondary  
4  
5  
6 99 teachers. Acceptability of study processes was also examined, in anticipation of conducting a  
7  
8  
9  
10 100 subsequent full trial. The feasibility study tested the intervention among maths and English  
11  
12  
13 101 teachers at one school, the pilot study tested the intervention among all-subject teachers and  
14  
15  
16 102 as part of a controlled trial. This paper presents the feasibility study and pilot study followed  
17  
18  
19 103 by an overall discussion and conclusion (ISRCTN38409550).  
20  
21  
22

## 23 104 1. FEASIBILITY STUDY

24  
25  
26  
27 105 Ethical approval for both studies was granted by the University of Cambridge's School of the  
28  
29  
30 106 Humanities and Social Sciences. The aim of the feasibility study was to assess (i) the  
31  
32  
33 107 feasibility, acceptability, costs, and preliminary effectiveness (for reducing sedentary time and  
34  
35  
36 108 improving wellbeing and time-on-task among students) of a PAL training programme for  
37  
38  
39 109 secondary school teachers, and (ii) the feasibility and acceptability of study procedures.  
40  
41  
42  
43  
44 110

### 45 46 47 111 Feasibility Study - Methods

#### 48 49 50 51 112 Recruitment

52  
53  
54  
55 113 Potential schools were identified from previous local research and approached with study  
56  
57  
58 114 information (n=2). One mixed-sex, non fee-paying secondary school participated. The head  
59  
60

1  
2  
3  
4 115 teacher provided written consent for the intervention to be delivered to the teachers, elected  
5  
6  
7 116 for the intervention to be trialled with maths and English teachers, and chose years 7 and 9 to  
8  
9  
10 117 participate in study evaluation measures. The school were told they would be able to keep the  
11  
12  
13 118 PAL training resources.

14  
15  
16  
17 119 Parents of all Year 7 and 9 students (11-14 years) received study information and students  
18  
19  
20 120 were invited to participate in evaluation measures. Parents were given two weeks to opt out  
21  
22  
23 121 (passive parental consent) via email, freephone, or freepost. From the students who had not  
24  
25  
26 122 been opted out, 120 (sixty Year-7 and sixty Year-9 students; 50% male) were randomly  
27  
28  
29 123 selected for evaluation measures (using class lists and random number generating software).  
30  
31  
32  
33 124 The study's feasibility focus meant that a formal power calculation was not necessary to inform  
34  
35  
36 125 sample size; a sample of 60 participants per year is consistent with samples of similar  
37  
38  
39 126 studies[15]. Students provided written assent for evaluation measures.

40  
41  
42  
43 127 Maths and English teachers (n=15) received study information two weeks before the PAL  
44  
45  
46 128 training. The senior leadership team requested that all maths and English teachers attend the  
47  
48  
49 129 training. Teachers could choose to participate in the evaluation measures, those agreeing  
50  
51  
52  
53 130 provided written consent. Over five school days students received approximately five maths  
54  
55  
56 131 lessons and four English lessons.

57  
58  
59  
60 132 Intervention

1  
2  
3  
4 133 The PAL training was developed by a team with teacher training qualifications and experience  
5  
6  
7 134 in indoor (two trainers) and outdoor active learning (one trainer). The training was delivered at  
8  
9  
10 135 the intervention school between March and April, during pre-scheduled after-school teacher-  
11  
12  
13 136 training time. Table 1 outlines the training programme and example active lessons are  
14  
15  
16 137 published as supplementary material. The focus was on supporting teachers to adopt active  
17  
18  
19 138 pedagogical approaches (teaching strategies that incorporate activity), rather than providing  
20  
21  
22 139 new, PAL plans. The training was underpinned by aspects of social cognitive theory and aimed  
23  
24  
25  
26 140 to enhance teachers' self-efficacy in relation to PAL[16]. As such it drew from two prominent  
27  
28  
29 141 behaviour change techniques: barrier identification and modelling/demonstrating  
30  
31  
32 142 behaviour[17]. With the former, teachers were encouraged to identify barriers that might  
33  
34  
35 143 impact their ability to implement PAL and plan ways to overcome these. With the latter, the  
36  
37  
38 144 trainers demonstrated a plethora of PAL teaching strategies that teachers could employ in  
39  
40  
41 145 their lessons. Figure 1 outlines the preliminary logic model of how the teacher-focused  
42  
43  
44 146 intervention could lead to changes in students' activity. Prior to the training, the research team  
45  
46  
47  
48 147 visited the participating school and ascertained the availability of indoor and outdoor spaces  
49  
50  
51 148 and equipment that could be used for PAL. Syllabi for maths and English were requested to  
52  
53  
54 149 allow trainers to prepare relevant examples for the training.

55  
56  
57  
58 150 Measurements  
59  
60



1  
2  
3  
4 151 Table 1 outlines the timeline of study measures. Feasibility and acceptability were assessed  
5  
6  
7 152 using questionnaires and focus groups. Three focus groups (with five teachers, eight Year-7  
8  
9  
10 153 and four Year-9 students) and an interview with the assistant head teacher were completed  
11  
12  
13 154 using a semi-structured interview.

14  
15  
16  
17 155 *i. Evaluation of Intervention and Study*

18  
19  
20  
21 156 *Feasibility/acceptability of the intervention:* Questionnaire items and focus group questions  
22  
23  
24 157 asked about teachers' perceptions of the utility, value and relevance of the training (adapted  
25  
26  
27 158 from[18, 19]). Questionnaires asked if teachers would recommend the training to other  
28  
29  
30 159 teachers and provided free-text boxes for teachers to suggest improvements. Training session  
31  
32  
33 160 attendance rates were recorded.

34  
35  
36  
37 161 *Feasibility/acceptability of PAL delivery:* Questionnaire items and focus group questions asked  
38  
39  
40 162 teachers about classroom management during PAL, enjoyment of teaching PAL, time needed  
41  
42  
43 163 to prepare and deliver PAL, and barriers to PAL delivery (items from[20]).

44  
45  
46  
47 164 *Acceptability of PAL participation:* Questionnaire items and focus group questions asked  
48  
49  
50 165 students about their experience of PAL participation, enjoyment of PAL, their preference for  
51  
52  
53 166 active vs. desk-based lessons, and the best and worst things about PAL.  
54  
55  
56  
57  
58  
59  
60

1  
2  
3  
4 167 *Costs:* Teachers and students reported resources purchased to deliver/participate in PAL. The  
5  
6  
7 168 research team recorded time and costs associated with the training team's development and  
8  
9  
10 169 delivery of the intervention.

11  
12  
13  
14 170 *Study processes:* The research team made field notes on study processes that proved to be  
15  
16  
17 171 challenging or ineffective, for example, students struggling to understand a questionnaire item.

18  
19  
20  
21 172 *ii. Intervention Outcomes*

22  
23  
24 173 *Student anthropometry:* Anthropometric measures were completed by trained staff using  
25  
26  
27  
28 174 standard procedures. Height was measured using a stadiometer (Leicester height measure,  
29  
30  
31 175 Chasmors, Leicester, UK) to the nearest 0.1 cm, and weight was measured to the nearest 0.1  
32  
33  
34 176 kg (Tanita, type TBF-300A, Tokyo, Japan). The measurement stations were set up so that  
35  
36  
37 177 results were not visible to anyone except the measurement staff. Height, weight, sex, birthdate  
38  
39  
40 178 and measurement date were used to calculate participants' body mass index (BMI; kg/m<sup>2</sup>) and  
41  
42  
43  
44 179 BMI percentile.

45  
46  
47  
48 180 *Activity intensity:* Axivity AX3 triaxial wrist-worn accelerometers (non-dominant wrist) were  
49  
50  
51 181 used to measure activity behaviours. These devices have been used among a larger sample  
52  
53  
54 182 of Year-9 participants in the GoActive study[21] and the UK Biobank Cohort Study[22]. Wrist-  
55  
56  
57 183 worn monitors are validated for the assessment of energy expenditure in pediatric  
58  
59  
60

1  
2  
3  
4 184 populations[23] with higher participant compliance when compared to waist-worn  
5  
6  
7 185 accelerometers[24]. Participants were given verbal and written instructions on monitor wear,  
8  
9  
10 186 including that the monitor was waterproof and could be worn continuously for the next seven  
11  
12  
13 187 days (Monday to Monday).

14  
15  
16  
17 188 The first day of monitor wear was dropped[25]; included participants provided valid data for  
18  
19  
20 189  $\geq 80\%$  of school hours for  $\geq$ two school days, at baseline and follow-up[26-28]. Acceleration  
21  
22  
23 190 was recorded at 100Hz with a dynamic range of  $\pm 8g$ . Data from the monitors was downloaded  
24  
25  
26 191 in continuous waveform. Euclidean Norm Minus One (ENMO) represents acceleration  
27  
28  
29 192 magnitude at each measurement, accounting for the influence of gravity. ENMO thresholds  
30  
31  
32  
33 193 were used to classify activity intensities: time spent at 0-30 ENMO was classified as sedentary  
34  
35  
36 194 activity (equivalent to 1-1.5 METs); 30-210 ENMO as light-intensity activity (1.5-4 METs); 210-  
37  
38  
39 195 500 ENMO as moderate-intensity activity (4-7 METs), and above 500 ENMO as vigorous-  
40  
41  
42 196 intensity activity[29, 30].

43  
44  
45  
46 197 *Mental Health and Wellbeing:* Students completed questionnaire measures of positive and  
47  
48  
49 198 negative affect[31], academic efficacy, disruptive behaviour[32], enjoyment of school  
50  
51  
52  
53 199 classes[33] and health related quality of life[34-39] at baseline and follow-up. All  
54  
55  
56 200 questionnaires are validated for use with adolescents and were analysed according to  
57  
58  
59 201 published instructions[31, 32, 39].  
60

1  
2  
3  
4 202 *Time-on-task*: Students' time-on-task was assessed during three lessons by one member of  
5  
6  
7 203 the research team using a momentary time-sampling procedure (which incurs less bias than  
8  
9  
10 204 other sampling procedures[40, 41]). At the start of each observed class, the teacher asked all  
11  
12  
13 205 students participating in the study to raise their hands. From the students that raised their  
14  
15  
16 206 hands, the researcher identified two boys and two girls (when possible) to observe. The  
17  
18  
19 207 researcher chose students sitting in different areas of the classroom. Each student was  
20  
21  
22 208 observed once per minute, in a consistent order, for the duration of the lesson. Students'  
23  
24  
25 209 behaviour was coded as: (i) on-task, (ii) off-task-passive, (iii) off-task-motor, or (iv) off-task-  
26  
27  
28 210 noise[42]. The mean percentage of intervals recorded as 'on task' for observed students and  
29  
30  
31 211 classes was calculated and used as the outcome measure.  
32  
33  
34  
35  
36 212 Prior to classroom observations, a validation activity was completed where two researchers  
37  
38  
39 213 discussed definitions and concurrently coded student behaviour using four online videos.  
40  
41  
42 214 Observers' codes matched for 95% of observation intervals.  
43  
44  
45

## 46 215 Descriptive Statistics

47  
48  
49  
50 216 Descriptive statistics of the sample, primary and secondary outcomes, and quantitative  
51  
52  
53 217 measures of feasibility and acceptability are summarised. Focus group transcripts were  
54  
55  
56 218 reviewed; recurring comments and themes relevant to the research questions were identified.  
57  
58  
59  
60

219

## 220 Feasibility Study - Results

### 221 Recruitment and sample characteristics

222 Student and teacher recruitment and characteristics are summarised in supplementary tables

223 1 and 2. Of 120 students invited to participate in the evaluation measures, 99 were recruited,

224 with 91 (92%) providing data at baseline and follow-up. Students had a mean age of 13.0

225 ( $\pm 1.1$ ) years, 52% were male and 27% were classified as overweight/obese. Teachers were

226 predominantly female (67%) and below the age of 45 (83%).

### 227 Feasibility and Acceptability

228 Training session one was attended by 14 (out of 15) teachers (7 maths, 7 English), training

229 session two was attended by 12 teachers (7 maths, 5 English), 11 teachers attended both

230 sessions. Teacher feedback demonstrated acceptability of the training, with 100%

231 recommending the training to other teachers (supplementary table 3). Individual and collective

232 efficacy for delivering PAL improved from 2.7 to 3.2, and 2.4 to 3 (out of 4), respectively. At

233 follow-up,  $\geq$ eight teachers had attempted to deliver PAL. Teacher's goals for PAL delivery

234 averaged 2.1 (SD=1.0) lessons per week, with an average targeted reduction in sitting time of

1  
2  
3  
4 235 15.8 (SD=8.0) minutes. Some teachers reported positive experiences of delivering PAL, while  
5  
6  
7 236 others reported challenges (Text box 1).  
8  
9

10 237 Teacher-reported barriers included disruptive behaviour, lethargy and off-topic chatting,  
11  
12  
13 238 challenges re-focusing students after an active portion of class, and limited classroom space.  
14  
15

16 239 Teachers identified facilitators of PAL delivery as theirs and the students' enjoyment of PAL,  
17  
18  
19  
20 240 good weather allowing them to go outside, more classroom space and a more diligent group  
21  
22  
23 241 of students. Teachers reported  $\leq 15$  extra minutes were required to plan PAL, and a few extra  
24  
25  
26 242 minutes were needed to prepare students for PAL participation.  
27  
28

29  
30 243 Of the students who recalled participating in an active lesson (47%), most preferred PAL to  
31  
32  
33 244 desk-based lessons (70%; 19% indicated 'no preference') and 93% wanted teachers to  
34  
35  
36 245 continue delivering them. Students reported enjoying going outside and moving around (30%),  
37  
38  
39 246 that PAL were less boring/more fun than desk-based lessons (26%) and that they could  
40  
41  
42  
43 247 concentrate better (14%). Negative comments about PAL included lethargy (12%), more  
44  
45  
46 248 disruptive behaviour (9%), and less work achieved (12%; text box 1).  
47  
48

49  
50 249 The assistant head teacher felt the training was well-received and high-quality professional  
51  
52  
53 250 development. The school's reasons for participating in the project included the potential for  
54  
55  
56 251 improving students' mental health and the motivation to be innovative in the classroom. The  
57  
58  
59  
60

1  
2  
3 252 assistant head teacher commented that teaching staff had enjoyed taking students outside for

4  
5  
6  
7 253 lessons and the project had involved a low level of commitment from the school.

8  
9  
10 254 Costs

11  
12  
13  
14 255 Training delivery costed £910, comprised of £410 staff costs and £500 for training equipment.

15  
16  
17 256 Participants reported purchasing sticky tape (teacher, ~£2) and shoes and tights (student,

18  
19  
20 257 ~£30).

21  
22  
23  
24 258 Study Processes

25  
26  
27  
28 259 The majority of study procedures were completed successfully. Challenges encountered

29  
30  
31 260 included that students struggled to complete a blank timetable indicating when their Maths

32  
33  
34 261 and English lessons were, and despite efforts, we were unable to schedule follow-up

35  
36  
37 262 classroom observations. Teacher baseline questionnaire return was low and the follow-up

38  
39  
40 263 focus group was conducted in a 15-minute timeslot due to late changes.

41  
42  
43  
44 264 Preliminary effectiveness

45  
46  
47  
48 265 Table 2 summarises baseline and follow-up data for all student measures. Sedentary time

49  
50  
51 266 increased by 8.7 minutes and time spent in light-intensity activity decreased by 8.1 minutes.

52  
53  
54 267 Minimal changes were observed in the mental health and wellbeing scores between baseline

55  
56  
57 268 and follow-up.

## 269 Feasibility Study - Reflections

270 The findings suggest it is feasible and acceptable to deliver a PAL training program to  
271 secondary school maths and English teachers. Importantly, the senior leadership  
272 representative was supportive of the training[43]. Secondary school teachers had mixed  
273 reports of delivering PAL, the identified barriers and facilitators were consistent with those  
274 previously reported[43]. It was noted that teacher acceptability of PAL delivery should be  
275 explored further in the next phase of intervention evaluation. The positive student response to  
276 PAL indicates acceptability and is consistent with results from PAL interventions in primary  
277 schools[44].

278 We were successful in recruiting and consenting participants, and the majority of evaluation  
279 measures were completed without problems. The retention of >90% of participants from  
280 baseline to follow-up suggests evaluation measures were acceptable. Suggested changes  
281 included scheduling all research activities at the start of the project and acquiring student  
282 timetables from the school's administration team.

283 Limitations of this feasibility study include the small sample size and the lack of control group,  
284 making it not possible to draw conclusions about the contribution of the intervention to the  
285 observed changes. The change in sedentary activity levels is inconsistent with previous  
286 research reporting that younger children's sedentary time on weekdays decreases between



1  
2  
3 287 spring and summer[45]. Increased negative feelings and lower wellbeing among students  
4  
5  
6 288 between March and June is consistent with typical changes observed in students' wellbeing  
7  
8  
9  
10 289 over a school term[46, 47].  
11  
12  
13  
14 290  
15  
16

## 17 291 **2. PILOT STUDY**

18  
19  
20  
21 292 Following successful implementation of the intervention in the feasibility study, we sought to  
22  
23  
24 293 extend our previous work and explore the potential value of conducting a full-scale randomised  
25  
26  
27 294 controlled trial. The aims of the pilot cluster-randomised controlled trial were (i) to assess the  
28  
29  
30 295 feasibility, acceptability, preliminary effectiveness and costs of delivering a PAL intervention  
31  
32  
33 296 at a whole-school level (to all subject teachers) and (ii) to test the acceptability of school-level  
34  
35  
36 297 randomisation.  
37  
38  
39  
40  
41 298  
42  
43  
44  
45 299 **Pilot Study - Methods**

### 46 47 48 300 **Recruitment and Randomisation**

49  
50  
51  
52 301 *Schools:* We aimed to recruit three schools - two intervention (to test whole-school delivery of  
53  
54  
55 302 the intervention in different settings) and one control (to test the acceptability of school-level  
56  
57  
58 303 randomisation). In June-July 2017, 26 non fee-paying, mixed gender, secondary schools in  
59  
60

1  
2  
3  
4 304 the East of England were emailed study information and invited to participate (the school that  
5  
6  
7 305 took part in the feasibility study was not invited to participate in the pilot study). The first three  
8  
9  
10 306 schools to agree were recruited; one school withdrew prior to student recruitment (and  
11  
12  
13 307 randomisation). We were unable to replace the school within an appropriate timeframe. After  
14  
15  
16 308 baseline measures, individuals separate from the research team performed a coin-toss to  
17  
18  
19 309 assign intervention and control schools. The nature of the intervention and goals of the  
20  
21  
22 310 evaluation measures meant it was not possible to blind participants. Due to differences in  
23  
24  
25  
26 311 follow-up measures between control and intervention schools, it was not possible to blind  
27  
28  
29 312 measurement staff at follow-up.

30  
31  
32  
33 313 *Students:* Recruitment proceeded as outlined for the feasibility study. Schools were asked to  
34  
35  
36 314 choose one younger year (7 or 8) and one older year (9 or 10) group to participate in evaluation  
37  
38  
39 315 measures. This would allow assessment of differential responses to the intervention by age.  
40  
41  
42 316 The intervention school selected Years 7 and 9 and the control school selected Years 8 and  
43  
44  
45  
46 317 9. Following feasibility study procedures, we randomly selected 130 students (50% male, 50%  
47  
48  
49 318 from each year) from each school for evaluation measures (based on feasibility study retention  
50  
51  
52 319 rates), with the aim of obtaining full data on 100 participants.

53  
54  
55  
56 320 *Teachers:* A teacher information and recruitment meeting was scheduled at both schools,  
57  
58  
59 321 during which a researcher introduced the study and distributed consent forms. Teachers were  
60

1  
2  
3  
4 322 advised by their senior leadership team that they would be required to attend the PAL training  
5  
6  
7 323 if allocated as the intervention school; all teachers were free to decide on participation in  
8  
9  
10 324 evaluation measures.

### 11 12 13 14 325 Intervention

15  
16  
17 326 Extending the feasibility study, the intervention was delivered to all subject teachers. Training  
18  
19  
20 327 all subject teachers is consistent with the whole-school approach recommended for activity  
21  
22  
23  
24 328 promotion and obesity prevention among youth[48, 49]. Given the acceptability of the training  
25  
26  
27 329 demonstrated in the feasibility study, the structure and goals of the training for the pilot study  
28  
29  
30 330 were similar. Minimal changes were made to the indoor training component, which focused  
31  
32  
33 331 on generic active learning strategies, applicable to any subject (e.g., different workstations  
34  
35  
36 332 around the classroom). In the feasibility study, the outdoor training component provided  
37  
38  
39  
40 333 multiple subject- and topic-specific lesson ideas; the inclusion of all subject teachers meant  
41  
42  
43 334 fewer subject-specific examples could be actively worked through during the pilot study  
44  
45  
46 335 training. One additional outdoor lessons trainer was involved to train the larger group of  
47  
48  
49 336 teachers.

### 50 51 52 53 337 Measurements

54  
55  
56  
57  
58  
59  
60

1  
2  
3  
4 338 Table 1 outlines the timeline of study measures; all data were collected at schools, during  
5  
6  
7 339 school hours. To increase teacher baseline questionnaire return, questionnaires were  
8  
9  
10 340 distributed during the pre-training teacher information meeting, and completed following  
11  
12  
13 341 consent. Data collection followed the same procedures as described for the feasibility study,  
14  
15  
16 342 except for the assessment of PAL dose and time on task.

17  
18  
19  
20 343 *PAL Dose:* A teacher timetable was created using school-provided student timetables,  
21  
22  
23 344 detailing their Year 7 and 9 lessons. During the student accelerometer assessment at follow-  
24  
25  
26 345 up, teachers were given their personalised timetable and asked 'please circle which of the  
27  
28  
29 346 listed Year 7 and/or 9 classes were (or will be) delivered as an active lesson.' Teachers  
30  
31  
32  
33 347 responses were used to calculate PAL dose. *Time on task:* Four lessons were observed at  
34  
35  
36 348 baseline and follow-up, at both schools. At baseline (prior to delivery of PAL training) the  
37  
38  
39 349 research team observed typical desk-based lessons. At follow-up, the research team asked  
40  
41  
42 350 to observe physically active lessons.

#### 43 44 45 46 351 Patient and Public Involvement

47  
48  
49  
50 352 In an earlier phase of CASE, opinions of key stakeholders regarding (i) suitable PA  
51  
52  
53 353 interventions for secondary schools and (ii) salient outcomes, were explored in a Delphi study  
54  
55  
56 354 ([7]). The decision to trial a PAL intervention and inclusion of mental health and time-on-task  
57  
58  
59 355 measures were informed by the Delphi study. While stakeholders were not involved in study

1  
2  
3  
4 356 design, conduct or recruitment, they reviewed questionnaires and provided feedback on  
5  
6  
7 357 qualitative findings. Student participants received a personal PA report and participating  
8  
9  
10 358 schools will be provided with a summary of the findings. Assistant head teachers commented  
11  
12  
13 359 on the time commitment of the intervention and teacher participants reported on time spent  
14  
15  
16 360 implementing intervention components.

## 20 361 Descriptive statistics

22  
23  
24 362 Descriptive statistics and focus group analysis proceeded as outlined for the feasibility study.  
25  
26  
27

## 28 363 **Pilot Study - Results**

29  
30  
31 364 Figure 2 shows the flow of participants, with further information on student and teacher  
32  
33  
34  
35 365 recruitment and sample characteristics in supplementary tables 1 and 2. Of the assenting  
36  
37  
38 366 students (n=222) 92% provided data at two time points. Half of the students were male and  
39  
40  
41 367 24% were classified as overweight/obese. The majority of teachers were female and >50% of  
42  
43  
44 368 staff reported delivering at least one PAL a week at baseline. At the intervention school, 30  
45  
46  
47  
48 369 and 33 teachers attended training session one and two, respectively (29 teachers attended  
49  
50  
51 370 both).

## 54 371 Feasibility and Acceptability

55  
56  
57  
58  
59  
60

1  
2  
3  
4 372 Average scores regarding teachers' acceptability of the training fell below 4 (the 'neutral'  
5  
6  
7 373 value) indicating negative feelings towards the training (supplementary table 3). Teachers  
8  
9  
10 374 reported training activities to be more suited for primary schools and not sufficiently  
11  
12  
13 375 challenging for secondary students. One teacher commented: "*they were more bonus*  
14  
15  
16 376 *activities, like extra treat things... you couldn't get much learning done through them*" (Science  
17  
18  
19 377 teacher, female). Teachers felt it was assumed they weren't delivering PALs prior to the  
20  
21  
22 378 training and this created resistance towards the training effort. Teachers reported that the PAL  
23  
24  
25 379 ideas were not novel and repetitive, the focus on outdoor learning was distracting, and the  
26  
27  
28  
29 380 value of outdoor activities wasn't clear.

31  
32  
33 381 More than half of teachers reported delivering at least one PAL a week at baseline. PAL  
34  
35  
36 382 delivery decreased for four teachers (11%), was maintained by six teachers (17%), and  
37  
38  
39 383 increased for 13 teachers (36%) (excluding P.E. and drama teachers). At follow-up, teachers  
40  
41  
42 384 indicated they were likely to continue teaching PAL, although they reported concerns about  
43  
44  
45 385 students not learning as much during PAL. Some teachers felt older students could be more  
46  
47  
48  
49 386 lethargic and resistant: "*the younger ones love getting up and interacting with each other. I*  
50  
51  
52 387 *think the older ones do, it just takes... more effort to get them going*" (History teacher, female).

53  
54  
55  
56 388 The majority of teachers reported  $\leq 15$  minutes for planning,  $\leq 5$  minutes for classroom  
57  
58  
59 389 preparation, and  $\leq 5$  minutes for student preparation. The time needed to deliver an outdoor  
60

1  
2  
3  
4 390 activity – in particular the transition between indoors and outdoors - was identified as a barrier  
5  
6  
7 391 to implementation. The assistant head teacher also commented about the pitch of the training  
8  
9  
10 392 and poor use of learning time due to transitioning. They felt the indoor component of the  
11  
12  
13 393 training had been more informative and appropriate, and commented staff had used active  
14  
15  
16 394 learning strategies indoors, but not outdoors. Finally, they commented that PAL  
17  
18  
19 395 implementation had declined with time.

20  
21  
22  
23 396 Of the students who recalled participating in a PAL (58%), >90% wanted teachers to continue  
24  
25  
26 397 teaching PAL, with no evidence of differences in intervention acceptability by sex or weight  
27  
28  
29 398 status. Students commented that PAL were fun and helped learning, and they liked moving  
30  
31  
32  
33 399 more: *"I really enjoyed it. It gave me more of an understanding... because when you're just*  
34  
35  
36 400 *copying off the board some writing I don't always understand it, then when you're moving*  
37  
38  
39 401 *about it's a lot more clearer"* (Year-7, female). Students however also commented that during  
40  
41  
42 402 PAL some students messed around more and didn't focus on work, and work was easier to  
43  
44  
45 403 do when sitting down.

46  
47  
48  
49 404 Student PAL dose

50  
51  
52  
53 405 In one week, 62/175 lessons (35%) to Year 7 and 9 students were active (31 lessons each).  
54  
55  
56 406 Each teacher delivered an average of 2.2 PALs (range = 0-9). Year-7 students received an  
57  
58  
59  
60

1  
2  
3  
4 407 average of 6.9 PAL (range: 5-10; 28% of one week's lessons) and Year-9 students 6.9 (range:  
5  
6  
7 408 2-13; 28%). This represents the contribution across all subjects.  
8  
9

#### 10 409 Costs

11  
12  
13  
14 410 The cost of delivering the training was £901, comprised of £451 staff time and £450  
15  
16  
17 411 equipment. Session one was delivered by three trainers, while session two was delivered by  
18  
19  
20 412 four trainers. Four teachers purchased resources to support PAL delivery, including science  
21  
22  
23 413 equipment, textiles equipment, post-it notes and whiteboard pens, and printed resources. Four  
24  
25  
26  
27 414 students reported purchasing resources to support PAL participation – three purchased sports  
28  
29  
30 415 shoes (~£30 per pair) and one a mouth guard (~£7).  
31  
32  
33

#### 34 416 Preliminary Effectiveness

35  
36  
37  
38 417 Table 3 presents activity intensity during PAL at follow-up and the equivalent lesson at  
39  
40  
41 418 baseline (excluding P.E. and drama lessons). There was no evidence of changes in sedentary  
42  
43  
44 419 activity or time spent in light, moderate and vigorous activity intensities. Table 4 summarises  
45  
46  
47  
48 420 baseline and follow-up values for all outcome measures for intervention and control  
49  
50  
51 421 participants. There was no evidence of preliminary effectiveness on sedentary time or light  
52  
53  
54 422 activity, or on indicators of mental health and wellbeing (including academic efficacy, positive  
55  
56  
57 423 & negative affect, and disruptive behaviour).  
58  
59  
60



## 424 Pilot Study - Reflections

425 Extending the work conducted in the feasibility study, this pilot study demonstrates the  
426 feasibility of whole-school intervention delivery. However, teachers expressed numerous  
427 concerns about the PAL training, including the insufficiently challenging content, lack of  
428 understanding of the value/purpose of the outdoor component, and potential loss of valuable  
429 learning time. These examples are consistent with previous research reporting that time and  
430 standardised testing pressures are barriers to PAL implementation, particularly for secondary  
431 school teachers[14]. The feedback suggests a need to review the content of the training,  
432 particularly the outdoor component.

433 Teachers comments indicated acceptability of delivering PAL and there was a measurable  
434 increase in PAL delivery. Feedback suggests teachers' acceptability may reflect prior  
435 knowledge and experience of PAL. In addition, students reported enjoying PAL. Support for  
436 the intervention by multiple stakeholders is an important facilitator of successful  
437 implementation[43]; as such, the feedback received here is encouraging.

438 Some students reported purchasing sports shoes and mouthguards for PAL; none of the  
439 strategies introduced in the PAL training involved students changing clothing/shoes or using  
440 mouthguards. It is conceivable that when completing the follow-up questionnaire some

1  
2  
3 441 students considered P.E. lessons in their appraisal of PAL and reported shoes and  
4  
5  
6 442 mouthguards purchased for this.  
7  
8  
9

10 443 We successfully tested study procedures and intervention delivery at a whole-school level,  
11  
12  
13 444 with adequate recruitment and retention rates and continued control school involvement  
14  
15  
16 445 indicating acceptability of randomisation. Efforts made to improve data collection processes  
17  
18  
19 446 from the feasibility study, e.g., of student timetables and teacher questionnaires, were  
20  
21  
22  
23 447 successful.  
24  
25  
26

27 448 The assessment of PAL dose showed that students received an average of 6-7 x 60-minute  
28  
29  
30 449 PAL a week, which has the potential to make a valuable contribution to reducing sedentary  
31  
32  
33 450 time among adolescents. Despite a measured increase in PAL delivery, there was no evidence  
34  
35  
36 451 of reduced sedentary time, suggesting a need to review the PAL strategies that were shared  
37  
38  
39 452 with teachers, with a focus on the amount of activity introduced. It is also possible that teachers  
40  
41  
42 453 over-reported PAL delivery out of concern for being judged by the researchers and/or their  
43  
44  
45 454 senior leadership team.  
46  
47  
48  
49

50 455  
51  
52  
53

## 54 456 **OVERALL DISCUSSION**

55  
56  
57  
58  
59  
60

1  
2  
3  
4 457 In this project, we aimed to assess the feasibility, acceptability, preliminary effectiveness and  
5  
6  
7 458 costs of a teacher-training programme for integrating activity into secondary school lessons.  
8  
9  
10 459 We also sought to understand the feasibility and acceptability of study procedures, including  
11  
12  
13 460 repeated accelerometer wear and school-level randomisation. The intervention was  
14  
15  
16 461 successfully delivered in two schools and quantitative and qualitative data was successfully  
17  
18  
19 462 collected from multiple stakeholders, enabling us to address all research questions. The  
20  
21  
22 463 majority of PAL evaluations have been carried out in primary schools[9] and as such, this  
23  
24  
25  
26 464 study makes a valuable contribution to the literature.

#### 29 465 **Feasibility/acceptability of PAL training**

30  
31  
32  
33 466 Consistent with previous research, it was feasible to deliver PAL training to secondary school  
34  
35  
36  
37 467 teachers over two, 2-hour, after-school sessions[50]. Schools scheduled the PAL training  
38  
39  
40 468 during pre-scheduled after-school teacher-training slots, as such, the intervention did not  
41  
42  
43 469 require teachers to attend any more after-school training than they typically would within a  
44  
45  
46 470 school term. In both studies, a small number of teachers were unable to attend both training  
47  
48  
49 471 sessions which may have influenced intervention outcomes. It is realistic that at any school  
50  
51  
52 472 receiving the intervention, a proportion of staff would be unable to attend both training  
53  
54  
55  
56 473 sessions. As such the external validity of the findings is supported.  
57  
58  
59  
60

1  
2  
3  
4 474 While acceptability of the training was demonstrated in the feasibility study and is reported  
5  
6  
7 475 elsewhere[18, 44, 50], feedback from teachers in the pilot study was less positive. Delivery to  
8  
9  
10 476 teachers of two subjects in the feasibility study meant a smaller training group and a smaller  
11  
12  
13 477 trainer:staff ratio than in the pilot study. This allowed more subject-specific discussion and  
14  
15  
16 478 more time to address teachers' personal questions. Teacher feedback suggests that training  
17  
18  
19 479 acceptability is related to teachers' experience delivering PAL. In the pilot study, teachers  
20  
21  
22 480 delivering PAL more regularly rated the intervention more poorly than less experienced  
23  
24  
25 481 teachers. A PAL intervention targeting teachers not regularly delivering PAL may be more  
26  
27  
28 482 acceptable. The positive responses to the training in the feasibility study (involving teachers  
29  
30  
31 483 reporting low levels of PAL delivery) support this suggestion.

#### 32 33 34 35 36 484 **Feasibility/acceptability of delivering/participating in PAL**

37  
38  
39  
40 485 In the feasibility study, teachers had mixed reviews of delivering PAL, whereas in the pilot  
41  
42  
43 486 study, teachers reported acceptability of delivering PAL. Pilot study teachers were more likely  
44  
45  
46 487 to report regular PAL delivery at baseline than feasibility teachers and to have had previous  
47  
48  
49 488 exposure to PAL during their initial teacher training and/or career. A longer trial period and  
50  
51  
52 489 increased support may have allowed teachers in the feasibility study to become more  
53  
54  
55 490 confident and accrue more positive PAL experiences. Overall, the data suggest that PAL  
56  
57  
58 491 delivery can be acceptable to secondary school teachers.

1  
2  
3 492 While teachers were the direct intervention recipients and their acceptability is crucial for  
4  
5  
6 493 successful implementation, it is important to consider acceptability for other stakeholders, who  
7  
8  
9  
10 494 also influence implementation. Across both studies students responded positively to PAL, and  
11  
12  
13 495 senior leadership representatives reported satisfaction with the intervention (in the pilot study,  
14  
15  
16 496 satisfaction with the indoor component). Both senior leadership representatives commented  
17  
18  
19 497 that reasons for study participation included the potential positive influence on students'  
20  
21  
22 498 mental health. This observation is consistent with previous findings[7] and indicates potentially  
23  
24  
25 499 effective strategies for promotion of the intervention to schools.  
26  
27  
28  
29

### 30 **Preliminary Effectiveness**

31  
32  
33 501 Despite a measured increase in PAL delivery, no changes in activity were observed. The  
34  
35  
36 502 findings are consistent with a systematic review and meta-analysis of secondary school  
37  
38  
39 503 classroom-based physical activity interventions, which reported no significant influence on  
40  
41  
42 504 activity behaviours[51]. Although, other PAL feasibility and pilot studies have reported more  
43  
44  
45 505 encouraging changes[42, 51-53]. In the feasibility study, early implementation efforts of Maths  
46  
47  
48 506 and English teachers may not have been sufficient to translate to changes in activity. It's  
49  
50  
51 507 possible that more or longer training sessions could increase teacher's confidence and  
52  
53  
54 508 competency for delivering PAL, however, initial discussions with the feasibility study school  
55  
56  
57 509 suggested that a 2-hour after-school training session would be acceptable while a 3-hour  
58  
59  
60

1  
2  
3 510 session would be too long. Across both studies, teachers were advised that any non-seated  
4  
5  
6 511 activity was considered an 'active lesson' - as such, the intervention may be too dilute for  
7  
8  
9  
10 512 measurable impact using wrist-worn accelerometers; classroom observations of PAL (beyond  
11  
12  
13 513 assessing time on task) may have aided our interpretation of the findings. Overall, the results  
14  
15  
16 514 suggest the need to review the amount of activity the PAL strategies introduce.

17  
18  
19  
20 515 Students received an encouraging dose of PAL (6-7 x 60-minute lessons per week). This dose  
21  
22  
23 516 is consistent with previous studies, for example, 10-30 minutes of activity, daily[42, 53-56] and  
24  
25  
26 517 3 x 60-minute PAL per week[57]. It is worth noting that teachers in the current pilot study chose  
27  
28  
29 518 how many PAL they delivered, rather than being prescribed a weekly target; as such the dose  
30  
31  
32 519 indicates what is naturally achievable by secondary school teachers. A weekly dose of 6-7  
33  
34  
35 520 PAL has the potential to substantially reduce adolescents' sedentary time during school hours,  
36  
37  
38 521 providing sufficient activity is introduced as part of the PAL.  
39  
40  
41  
42

#### 43 522 **Costs**

44  
45  
46  
47 523 Training delivery costs (independent of travel and planning time) was estimated around £900  
48  
49  
50 524 (\$1,187) in both studies. Strategies to reduce costs could include reducing the number of staff  
51  
52  
53 525 delivering the sessions or hiring staff with a mixture of training levels, rather than the highly  
54  
55  
56 526 experienced staff in the current studies. Approximately 25% of the cost was spent on  
57  
58  
59 527 equipment, primarily for outdoor-based subject-specific examples; reviewing the equipment

1  
2  
3  
4 528 purchases may identify cost saving opportunities. Research reports that small grants  
5  
6  
7 529 (~\$2,000) to schools can lead to increased implementation of practices to promote activity[58].  
8  
9  
10 530 Senior leadership teams commented on how thinly English schools budgets are stretched; it  
11  
12  
13 531 was suggested that school funds set aside for (for example) mental health services might  
14  
15  
16 532 represent an avenue of funding for the programme for some schools.  
17  
18  
19

### 20 533 **Strengths and Limitations**

21  
22  
23  
24 534 High quality formative work for interventions is necessary to ensure appropriate allocation of  
25  
26  
27 535 research efforts and funding, and the publication of feasibility and pilot research is important  
28  
29  
30 536 to support other researchers and interventionists[59]. Limitations of this work include that  
31  
32  
33 537 samples were predominantly white; consequently, we are unable to explore differential  
34  
35  
36 538 responses to PAL by ethnicity. Moreover, parental opt out consent procedures limited the  
37  
38  
39  
40 539 ability to obtain information on participants' socioeconomic position. The issue of lack of  
41  
42  
43 540 diversity among samples in PAL studies has been previously raised[60]; future research  
44  
45  
46 541 should seek to explore feasibility, acceptability and effectiveness among different racial/ethnic  
47  
48  
49 542 and socio-economic groups. Estimated training delivery costs are based on wage rates,  
50  
51  
52 543 national insurance and superannuation costs but don't include overhead costs such as costs  
53  
54  
55 544 of employing individuals and providing building space. As such, training delivery costs may be  
56  
57  
58 545 underestimated. In addition, we did not carry out longer-term follow-up assessments so we do  
59  
60

1  
2  
3  
4 546 not know if teachers continued to deliver PAL beyond eight weeks after the training. Finally,  
5  
6  
7 547 we do not believe that lack of blinding of measurement staff has impacted the conclusions  
8  
9  
10 548 drawn from these studies, but acknowledge that a potential fully-powered trial would benefit  
11  
12  
13 549 from efforts to blind measurement staff.  
14  
15

## 16 17 550 **CONCLUSION**

18  
19  
20  
21 551 We successfully demonstrated the feasibility and acceptability of introducing and evaluating a  
22  
23  
24 552 PAL teacher-training programme in secondary schools. Across feasibility and pilot studies,  
25  
26  
27 553 teachers' acceptability of the intervention and of delivering PAL was demonstrated, although  
28  
29  
30 554 aspects of the training programme, particularly the outdoor component, require review. The  
31  
32  
33 555 intervention was acceptable to students and senior leadership representatives, and the dose  
34  
35  
36 556 of PAL received by students was sufficient to have the potential to make a substantial  
37  
38  
39  
40 557 contribution to reducing adolescents' sedentary time during school hours. However, we did  
41  
42  
43 558 not observe preliminary effectiveness on students' activity behaviours or wellbeing indicators.  
44  
45  
46 559 Taken together, the findings do not support continuation with the current PAL training  
47  
48  
49 560 programme, though its acceptability does highlight the need for further research into how the  
50  
51  
52 561 identified barriers might be overcome.  
53  
54  
55  
56  
57  
58  
59  
60



## 562 ACKNOWLEDGEMENTS

563 The Creating Active School Environments (CASE) project is a three-year programme of  
564 research funded by the Department of Health Policy Research Programme (PR-R5-0213-  
565 25001). This report is based on independent research commissioned and funded by the NIHR  
566 Policy Research Programme (Opportunities within the school environment to shift the  
567 distribution of activity intensity in adolescents; PR-R5-0213-25001). The views expressed in  
568 the publication are those of the author(s) and not necessarily those of the NHS, the NIHR, the  
569 Department of Health, 'arms' length bodies or other government departments.

570 The authors would like to thank the schools, students, teachers, senior leadership  
571 representatives and secondary school stakeholders for their participation in, and contributions  
572 to, the feasibility and pilot studies. In addition, the authors would like to thank everyone who  
573 supported data collection, as well as Colin Farr, Beth Haines and Gwen Brierley for their study  
574 co-ordination support, and Antonia Smith and Kate Westgate for their assistance in preparing  
575 and processing the accelerometer data.

576

## 577 Data sharing

1  
2  
3  
4 578 The datasets are not available for download. The study's participant information sheets and  
5  
6  
7 579 ethics applications stipulated that the data would not be shared outside of the research team.  
8  
9  
10 580 The data are held at the MRC Epidemiology Unit at the University of Cambridge.  
11  
12

13 581

16 582 **Competing interests**

17  
18  
19 583 The authors declare that they have no competing interests.  
20  
21  
22

23 584

26 585

29 586

32 587

35 588 **Author contributions**

36  
37  
38 589 All authors (Catherine Gammon, Katie Morton, Andrew Atkin, Kirsten Corder, Andy Daly-  
39  
40  
41

42 590 Smith, Thomas Quarmby, Marc Suhrcke, David Turner and Esther van Sluijs) contributed to  
43  
44  
45 591 the conceptualisation and design of the work, and reviewed and approved the final manuscript.  
46  
47

48 592 Catherine Gammon, David Turner, and Esther van Sluijs contributed to the acquisition,  
49  
50  
51 593 analysis and interpretation of data. Catherine Gammon drafted the manuscript.  
52  
53  
54  
55  
56  
57  
58  
59  
60

## REFERENCES

1. Hallal, P.C., et al., *Global physical activity levels: surveillance progress, pitfalls, and prospects*. The Lancet, 2012. **380**(9838): p. 247-257.
2. Matthews, C.E., et al., *Amount of time spent in sedentary behaviors in the United States, 2003-2004*. Am J Epidemiol, 2008. **167**(7): p. 875-81.
3. Brooke, H.L., et al., *Changes in time-segment specific physical activity between ages 10 and 14 years: A longitudinal observational study*. J Sci Med Sport, 2016. **19**(1): p. 29-34.
4. Steele, R.M., et al., *An investigation of patterns of children's sedentary and vigorous physical activity throughout the week*. Int J Behav Nutr Phys Act, 2010. **7**: p. 88.
5. Morton, K.L., et al., *The school environment and adolescent physical activity and sedentary behaviour: a mixed-studies systematic review*. Obes Rev, 2016. **17**(2): p. 142-58.
6. Morton, K.L., et al., *School policies, programmes and facilities, and objectively measured sedentary time, LPA and MVPA: associations in secondary school and over the transition from primary to secondary school*. Int J Behav Nutr Phys Act, 2016. **13**: p. 54.
7. Morton, K.L., et al., *Engaging stakeholders and target groups in prioritising a public health intervention: the Creating Active School Environments (CASE) online Delphi study*. BMJ Open, 2017. **7**(1): p. e013340.
8. Bartholomew, J.B. and E.M. Jowers, *Physically active academic lessons in elementary children*. Prev Med, 2011. **52 Suppl 1**: p. S51-4.
9. Martin, R. and E.M. Murtagh, *Effect of Active Lessons on Physical Activity, Academic, and Health Outcomes: A Systematic Review*. Res Q Exerc Sport, 2017. **88**(2): p. 149-168.
10. Norris, E., et al., *Physically active lessons as physical activity and educational interventions: a systematic review of methods and results*. Prev Med, 2015. **72**: p. 116-25.
11. Howie, E.K., R.D. Newman-Norlund, and R.R. Pate, *Smiles count but minutes matter: responses to classroom exercise breaks*. Am J Health Behav, 2014. **38**(5): p. 681-9.
12. Daly-Smith, A.J., et al., *Systematic review of acute physically active learning and classroom movement breaks on children's physical activity, cognition, academic performance and classroom behaviour: understanding critical design features*. BMJ Open Sport Exerc Med, 2018. **4**(1): p. e000341.
13. Helgeson, J., *The impact of physical activity on academics in English classes at the junior high school level*. 2013, Northcentral University: ProQuest LLC. p. 188.
14. Cothran, D.J., P.H. Kulinna, and A.C. Garn, *Classroom teachers and physical activity integration*. Teaching and Teacher Education, 2010. **26**(7): p. 1381-1388.
15. Mullender-Wijnsma, M.J., et al., *Improving academic performance of school-age children by physical activity in the classroom: 1-year program evaluation*. J Sch Health, 2015. **85**(6): p. 365-71.
16. Bandura, A., *Social foundations of thought and action: a social-cognitive theory*. 1986, Englewood Cliffs, NJ: Prentice-Hall
17. Abraham, C. and S. Michie, *A taxonomy of behavior change techniques used in interventions*. Health Psychol, 2008. **27**(3): p. 379-87.
18. Gibson, C.A., et al., *Physical activity across the curriculum: year one process evaluation results*. Int J Behav Nutr Phys Act, 2008. **5**: p. 36.
19. Edmundson, E.W., et al., *CATCH: classroom process evaluation in a multicenter trial*. Health Educ Q, 1994. **Suppl 2**: p. S27-s50.
20. Webster, C.A., H. Erwin, and M. Parks, *Relationships Between and Changes in Preservice Classroom Teachers' Efficacy Beliefs, Willingness to Integrate Movement, and Perceived Barriers to Movement Integration*. Physical Educator, 2013. **70**(3): p. 314-335.
21. Brown, H.E., et al., *A cluster randomised controlled trial to evaluate the effectiveness and cost-effectiveness of the GoActive intervention to increase physical activity among adolescents aged 13-14 years*. BMJ Open, 2017. **7**(9): p. e014419.

22. Sudlow, C., et al., *UK biobank: an open access resource for identifying the causes of a wide range of complex diseases of middle and old age*. PLoS Med, 2015. **12**(3): p. e1001779.
23. Phillips, L.R., G. Parfitt, and A.V. Rowlands, *Calibration of the GENEA accelerometer for assessment of physical activity intensity in children*. J Sci Med Sport, 2013. **16**(2): p. 124-8.
24. Rosenberger, M.E., et al., *Estimating activity and sedentary behavior from an accelerometer on the hip or wrist*. Med Sci Sports Exerc, 2013. **45**(5): p. 964-75.
25. Dossegger, A., et al., *Reactivity to accelerometer measurement of children and adolescents*. Med Sci Sports Exerc, 2014. **46**(6): p. 1140-6.
26. Haapala, H.L., et al., *Changes in physical activity and sedentary time in the Finnish Schools on the Move program: a quasi-experimental study*. Scand J Med Sci Sports, 2017. **27**(11): p. 1442-1453.
27. Yli-Piipari, S., et al., *Objectively Measured School Day Physical Activity Among Elementary Students in the United States and Finland*. J Phys Act Health, 2016. **13**(4): p. 440-6.
28. Lau, E.Y., et al., *Changes in Physical Activity in the School, Afterschool, and Evening Periods During the Transition From Elementary to Middle School*. J Sch Health, 2017. **87**(7): p. 531-537.
29. White, T., et al., *Estimation of Physical Activity Energy Expenditure during Free-Living from Wrist Accelerometry in UK Adults*. PLoS One, 2016. **11**(12): p. e0167472.
30. Janssen, I. and A.G. Leblanc, *Systematic review of the health benefits of physical activity and fitness in school-aged children and youth*. Int J Behav Nutr Phys Act, 2010. **7**: p. 40.
31. Thompson, E.R., *Development and Validation of an Internationally Reliable Short-Form of the Positive and Negative Affect Schedule (PANAS)*. Journal of Cross-Cultural Psychology, 2016. **38**(2): p. 227-242.
32. Midgley, C., et al., *Manual for the patterns of adaptive learning scales*. 2000, University of Michigan: Michigan, US.
33. Jones, R.D., *Student engagement. Teacher handbook*. 2009, Center for Leadership in Education: New York.
34. Furber, G. and L. Segal, *The validity of the Child Health Utility instrument (CHU9D) as a routine outcome measure for use in child and adolescent mental health services*. Health Qual Life Outcomes, 2015. **13**: p. 22.
35. Stevens, K., *Developing a descriptive system for a new preference-based measure of health-related quality of life for children*. Qual Life Res, 2009. **18**(8): p. 1105-13.
36. Stevens, K., *Assessing the performance of a new generic measure of health-related quality of life for children and refining it for use in health state valuation*. Appl Health Econ Health Policy, 2011. **9**(3): p. 157-69.
37. Stevens, K., *The Child Health Utility 9D (CHU9D) – A New Paediatric Preference Based Measure of Health Related Quality of Life*, in PRO Newsletter. 2010.
38. Stevens, K.J., *Working with children to develop dimensions for a preference-based, generic, pediatric, health-related quality-of-life measure*. Qual Health Res, 2010. **20**(3): p. 340-51.
39. Stevens, K., *The development of a preference based paediatric health related quality of life measure for use in economic evaluation*. 2008, The University of Sheffield: Sheffield.
40. Hintze, J.M., V.R. J., and E.S. Shapiro, *Best practices in the systematic direct observation of student behaviour*. 2002. **IV**(4): p. 993-1006.
41. Johnson, A.H., S.M. Chafouleas, and A.M. Briesch, *Dependability of data derived from time sampling methods with multiple observation targets*. Sch Psychol Q, 2017. **32**(1): p. 22-34.
42. Mahar, M.T., et al., *Effects of a classroom-based program on physical activity and on-task behavior*. Med Sci Sports Exerc, 2006. **38**(12): p. 2086-94.
43. Nathan, N., et al., *Barriers and facilitators to the implementation of physical activity policies in schools: A systematic review*. Prev Med, 2018. **107**: p. 45-53.
44. Dyrstad, S.M., et al., *Physically active academic lessons: acceptance, barriers and facilitators for implementation*. BMC Public Health, 2018. **18**(1): p. 322.

- 1
- 2
- 3
- 4 45. Atkin, A.J., et al., *Seasonal Variation in Children's Physical Activity and Sedentary Time*. Med Sci Sports Exerc, 2016. **48**(3): p. 449-56.
- 5
- 6 46. Verma, S., et al., *Highs and lows: Naturalistic changes in mood and everyday hassles over school and vacation periods in adolescents*. J Adolesc, 2017. **61**: p. 17-21.
- 7
- 8 47. Eminson, K., et al., *How does age affect the relationship between weight and health utility during the middle years of childhood?* Qual Life Res, 2018.
- 9
- 10 48. Lee, A., *Health-promoting schools: evidence for a holistic approach to promoting health and improving health literacy*. Appl Health Econ Health Policy, 2009. **7**(1): p. 11-7.
- 11
- 12 49. Committee on Physical Activity Physical Education in the School. *Educating the Student Body: Taking Physical Activity and Physical Education to School*, ed. H.W. Kohl, III and H.D. Cook. 2013, Washington (DC): National Academies Press (US).
- 13
- 14
- 15 50. Hankonen, N., et al., *Randomised controlled feasibility study of a school-based multi-level intervention to increase physical activity and decrease sedentary behaviour among vocational school students*. Int J Behav Nutr Phys Act, 2017. **14**(1): p. 37.
- 16
- 17
- 18 51. McMichan, L., A.M. Gibson, and D.A. Rowe, *Classroom-Based Physical Activity and Sedentary Behavior Interventions in Adolescents: A Systematic Review and Meta-Analysis*. J Phys Act Health, 2018. **15**(5): p. 383-393.
- 19
- 20
- 21
- 22 52. Oliver, M., G. Schofield, and E. McEvoy, *An integrated curriculum approach to increasing habitual physical activity in children: a feasibility study*. J Sch Health, 2006. **76**(2): p. 74-9.
- 23
- 24 53. Erwin, H.E., et al., *Promoting children's health through physically active math classes: a pilot study*. Health Promot Pract, 2011. **12**(2): p. 244-51.
- 25
- 26 54. Reznik, M., et al., *A classroom-based physical activity intervention for urban kindergarten and first-grade students: a feasibility study*. Child Obes, 2015. **11**(3): p. 314-24.
- 27
- 28 55. Li, Y.P., et al., *Report on childhood obesity in China (8): effects and sustainability of physical activity intervention on body composition of Chinese youth*. Biomed Environ Sci, 2010. **23**(3): p. 180-7.
- 29
- 30 56. Donnelly, J.E., et al., *Physical Activity Across the Curriculum (PAAC): a randomized controlled trial to promote physical activity and diminish overweight and obesity in elementary school children*. Prev Med, 2009. **49**(4): p. 336-41.
- 31
- 32
- 33 57. Riley, N., et al., *Outcomes and process evaluation of a programme integrating physical activity into the primary school mathematics curriculum: The EASY Minds pilot randomised controlled trial*. J Sci Med Sport, 2015. **18**(6): p. 656-61.
- 34
- 35 58. Miller, G.F., et al., *Evaluation of Let's Move! active schools activation grants*. Prev Med, 2018. **108**: p. 36-40.
- 36
- 37 59. Jago, R. and S.J. Sebire, *Publishing pilot and feasibility evaluations of behavioural interventions: implications for preventive medicine*. Prev Med, 2012. **55**(6): p. 548-9.
- 38
- 39 60. Benjamin Neelon, S.E., K.R. Hesketh, and E.M. van Sluijs, *Will Physically Active Lessons Improve Academic Achievement for All or Widen the Achievement Gap?* Pediatrics, 2016. **137**(3): p. e20154137.
- 40
- 41
- 42
- 43
- 44
- 45
- 46
- 47
- 48
- 49
- 50
- 51
- 52
- 53
- 54
- 55
- 56
- 57
- 58
- 59
- 60

1  
2  
3 **Figure legends:**  
4

5  
6 Figure 1. Logic model of how a PAL intervention may result in changes in student's  
7 sedentary activity (SED).  
8

9  
10 Figure 2. CONSORT flow chart of pilot study participant recruitment (schools and students).  
11  
12  
13  
14  
15  
16  
17  
18  
19  
20  
21  
22  
23  
24  
25  
26  
27  
28  
29  
30  
31  
32  
33  
34  
35  
36  
37  
38  
39  
40  
41  
42  
43  
44  
45  
46  
47  
48  
49  
50  
51  
52  
53  
54  
55  
56  
57  
58  
59  
60

For peer review only

Table 1. Outline of the PAL training programme and timeline of evaluation measures.

|                            | Week 0<br>Baseline Measures                                                                                                                                                                                                                                  | Week 1                                                                                                                                                                                                                                                                                                                                                                                       | Week 4                                                                                                                                                                                                                                                                                 | Week 12<br>Follow-Up Measures                                                                                                                                                                                                                                                                                                                                                   |
|----------------------------|--------------------------------------------------------------------------------------------------------------------------------------------------------------------------------------------------------------------------------------------------------------|----------------------------------------------------------------------------------------------------------------------------------------------------------------------------------------------------------------------------------------------------------------------------------------------------------------------------------------------------------------------------------------------|----------------------------------------------------------------------------------------------------------------------------------------------------------------------------------------------------------------------------------------------------------------------------------------|---------------------------------------------------------------------------------------------------------------------------------------------------------------------------------------------------------------------------------------------------------------------------------------------------------------------------------------------------------------------------------|
| <b>Feasibility Study</b>   | <b>Students:</b> <ul style="list-style-type: none"> <li>• Anthropometry</li> <li>• Questionnaire (15 minutes)</li> <li>• Accelerometry</li> <li>• Time-on-Task</li> </ul> <b>Teachers:</b> <ul style="list-style-type: none"> <li>• Questionnaire</li> </ul> | <b>Training session 1 (2 hours)</b><br><b>30 minutes:</b> Introduction to active learning<br><b>40 minutes:</b> Split group in half: <ul style="list-style-type: none"> <li>• Half stay in classroom and review classroom-based PAL strategies</li> <li>• Half go outside and review outdoor PAL strategies</li> </ul> <b>40 minutes:</b> Groups switch<br><b>10 minutes:</b> Final comments | <b>Training session 2 (2 hours)</b><br><b>30 minutes:</b> Sharing PAL experiences<br><b>30 minutes:</b> Outdoor PAL examples<br><b>15 minutes:</b> Indoor PAL examples<br><b>15 minutes:</b> Discussion of intervention expectations<br><b>10 minutes:</b> Post-training questionnaire | <b>Students:</b> <ul style="list-style-type: none"> <li>• Questionnaire (15 minutes)</li> <li>• Accelerometry</li> <li>• Time-on-Task</li> <li>• Focus groups</li> </ul> <b>Teachers:</b> <ul style="list-style-type: none"> <li>• Questionnaire</li> <li>• Focus group</li> </ul> <b>Senior Leadership Team:</b> <ul style="list-style-type: none"> <li>• Interview</li> </ul> |
| <b>Pilot Study:</b>        | <i>Same as for</i>                                                                                                                                                                                                                                           | <i>Same as for feasibility study</i>                                                                                                                                                                                                                                                                                                                                                         | <b>Training session 2 (2 hours)</b>                                                                                                                                                                                                                                                    | <i>Same as for feasibility</i>                                                                                                                                                                                                                                                                                                                                                  |
| <b>Intervention School</b> | <i>feasibility study baseline measures</i>                                                                                                                                                                                                                   | <i>training session 1</i>                                                                                                                                                                                                                                                                                                                                                                    | <b>45 minutes:</b> Split group in half: <ul style="list-style-type: none"> <li>• Half review indoor PAL strategies</li> <li>• Half review outdoor PAL strategies</li> </ul> <b>45 minutes:</b> Groups switch                                                                           | <i>study follow-up measures</i>                                                                                                                                                                                                                                                                                                                                                 |



---

**10 minutes:** Whole-group outdoor activity.  
**10 minutes:** Post-training questionnaire

---

|                     |                          |                     |                     |                                                                                           |
|---------------------|--------------------------|---------------------|---------------------|-------------------------------------------------------------------------------------------|
| <b>Pilot Study:</b> | <i>Same as for</i>       | No training session | No training session | <b>Students:</b>                                                                          |
| <b>Control</b>      | <i>feasibility study</i> |                     |                     | <ul style="list-style-type: none"> <li>• Questionnaire</li> </ul>                         |
| <b>School</b>       | <i>baseline measures</i> |                     |                     | <ul style="list-style-type: none"> <li>• Accelerometry</li> <li>• Time-on-Task</li> </ul> |

---

For peer review only

1  
2  
3  
4  
5  
6  
7  
8  
9  
10  
11  
12  
13  
14  
15  
16  
17  
18  
19  
20  
21  
22  
23  
24  
25  
26  
27  
28  
29  
30  
31  
32  
33  
34  
35  
36  
37  
38  
39  
40  
41  
42  
43  
44  
45  
46



**Table 2. Baseline and follow-up values for primary and secondary outcomes; mean (SD).**

|                                    | N  | Baseline     | Follow-Up    | Mean Difference<br>(95% C.I.) |
|------------------------------------|----|--------------|--------------|-------------------------------|
| Sedentary activity (minutes)       | 76 | 237.4 (26.4) | 246.1 (27.6) | 8.7 (3.8,13.7)                |
| Light activity (minutes)           | 76 | 139.8 (21.8) | 131.7 (22.6) | -8.1 (-12.4,-3.8)             |
| Moderate activity (minutes)        | 76 | 10.8 (6.0)   | 10.3 (5.8)   | -0.6 (-1.4,0.3)               |
| Vigorous activity (minutes)        | 76 | 2.0 (2.0)    | 1.9 (1.8)    | -0.1 (-0.4,0.3)               |
| Time-on-task (% intervals on-task) | 11 | 66.1         | -            | -                             |
| Academic Efficacy (score 1-5)      | 85 | 3.51 (0.80)  | 3.63 (0.83)  | -                             |
| Disruptive Behaviour (score 1-5)   | 82 | 1.90 (0.95)  | 1.94 (0.98)  | -                             |
| CHU-9D (score 0.33-1.0)            | 89 | 0.86 (0.10)  | 0.84 (0.10)  | -                             |
| Positive Affect (score 1-5)        | 81 | 17.35 (3.44) | 16.16 (3.36) | -                             |
| Negative Affect (score 1-5)        | 84 | 10.55 (3.28) | 10.71 (3.48) | -                             |

Length of school day = 390 minutes

**Table 3. Activity intensity during 60-minute PAL at follow-up and the equivalent lesson at baseline (excluding P.E. and drama); mean (SD).**

|                                 | N   | Baseline   | Follow-Up  | Mean<br>Difference (95%<br>C.I.) |
|---------------------------------|-----|------------|------------|----------------------------------|
| Sedentary activity<br>(minutes) | 310 | 41.1 (8.4) | 42.1 (8.6) | 1.0 (-0.1,2.1)                   |
| Light activity (minutes)        | 310 | 17.9 (7.6) | 16.9 (7.8) | -1.1 (-2.1,0)                    |
| Moderate activity<br>(minutes)  | 310 | 0.8 (1.0)  | 0.9 (1.0)  | 0 (-0.1,0.2)                     |
| Vigorous activity (minutes)     | 310 | 0.2 (1.1)  | 0.2 (0.6)  | 0 (-0.1,0.1)                     |

Table 4. Baseline and follow-up values for primary and secondary outcomes; mean (SD).

|                                    | Control School <sup>a</sup> |              |              |                            | Intervention School <sup>a</sup> |              |              |                            |
|------------------------------------|-----------------------------|--------------|--------------|----------------------------|----------------------------------|--------------|--------------|----------------------------|
|                                    | N                           | Baseline     | Follow-Up    | Mean Difference (95% C.I.) | N                                | Baseline     | Follow-Up    | Mean Difference (95% C.I.) |
| Sedentary activity (minutes)       | 74                          | 217.0 (32.4) | 222.1 (36.2) | 5.1 (-1.3,11.5)            | 96                               | 236.4 (31.8) | 237.7 (40.6) | 1.3 (-6.2,8.7)             |
| Light activity (minutes)           | 74                          | 140.5 (26.0) | 136.6 (31.9) | -4.0 (-10.1,2.2)           | 96                               | 129.0 (26.8) | 124.8 (31.2) | -4.2 (-10.5,2.1)           |
| Moderate activity (minutes)        | 74                          | 16.2 (7.5)   | 14.2 (7.8)   | -2.0 (-3.2,-0.8)           | 96                               | 11.1 (6.3)   | 10.1 (6.3)   | -1.1 (-2.0,-0.1)           |
| Vigorous activity (minutes)        | 74                          | 5.5 (3.9)    | 4.7 (3.5)    | -0.8 (-1.4,-0.2)           | 96                               | 3.1 (3.0)    | 3.0 (2.9)    | -0.1 (-0.6,0.4)            |
| Time-on-task (% intervals on-task) | 28 <sup>b</sup>             | 73.7         | 56.6         | -                          | 27 <sup>c</sup>                  | 79.1         | 77.5         | -                          |
| Academic Efficacy (score 1-5)      | 98                          | 3.41 (0.71)  | 3.32 (0.71)  | -                          | 10<br>7                          | 3.76 (0.64)  | 3.71 (0.76)  | -                          |
| Disruptive Behaviour (score 1-5)   | 98                          | 2.34 (1.23)  | 2.47 (1.19)  | -                          | 10<br>7                          | 1.94 (0.94)  | 2.04 (1.01)  | -                          |
| CHU-9D (score 0.33-1.0)            | 97                          | 0.84 (0.10)  | 0.84 (0.09)  | -                          | 10<br>6                          | 0.87 (0.09)  | 0.85 (0.10)  | -                          |
| Positive Affect (score 1-5)        | 98                          | 15.95 (3.33) | 16.08 (3.53) | -                          | 10<br>7                          | 17.80 (3.10) | 17.54 (3.74) | -                          |
| Negative Affect (score 1-5)        | 98                          | 10.03 (3.30) | 9.87 (3.14)  | -                          | 10<br>6                          | 10.12 (3.47) | 9.95 (3.06)  | -                          |

<sup>a</sup> Length of school day varies: control school = 380 minutes, intervention school = 400 minutes

<sup>b</sup> 14 students observed at baseline across 4 classes (all non-active lessons) and 14 students observed at follow-up across 4 classes (all non-active lessons). Students observed at baseline were different from students observed at follow-up.

<sup>c</sup> 14 students observed at baseline across 4 classes (all non-active lessons) and 13 students observed at follow-up across 4 classes (3 active lessons, 1 non-active lesson). Students observed at baseline were different from students observed at follow-up.

1  
2  
3  
4  
5  
6 Text Box 1.  
7

8 *"I really enjoyed them (active lessons), they (the students) enjoyed them as well, they*  
9 *seemed to get a lot out of them...it was good fun, it was nothing really any different to*  
10 *what I was normally doing, just with a few added extras"* (Maths teacher, female).  
11

12  
13  
14 *"I thought they (the students) would enjoy going outside... I had high hopes for that but it*  
15 *was a Friday afternoon and I don't think they were ready for it... they were causing*  
16 *disruption, they tried to walk off"* (English teacher, female).  
17

18  
19  
20 *"we concentrated more because it was more fun than just sitting around"* (Year-7, male),  
21 and *"when you're sitting down you can get quite bored and get easily distracted whereas*  
22 *if you're moving about you've actually got something to do"* (Year-7, female).  
23  
24  
25

26  
27  
28  
29  
30  
31  
32  
33  
34  
35  
36  
37  
38  
39  
40  
41  
42  
43  
44  
45  
46  
47  
48  
49  
50  
51  
52  
53  
54  
55  
56  
57  
58  
59  
60

er review only

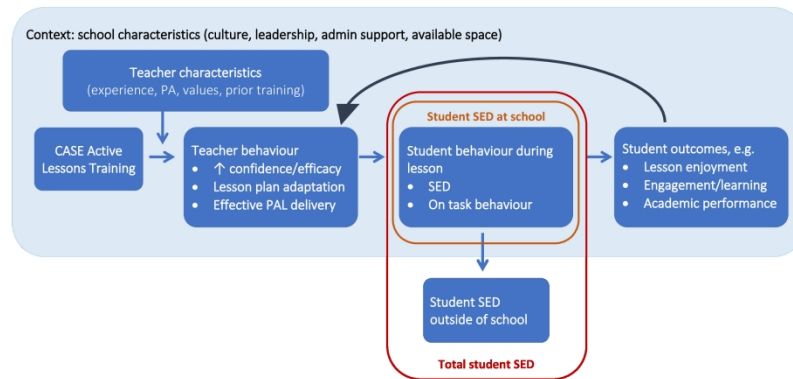

Figure 1. Logic model of how a PAL intervention may result in changes in student's sedentary activity (SED).

297x209mm (300 x 300 DPI)

1  
2  
3  
4  
5  
6  
7  
8  
9  
10  
11  
12  
13  
14  
15  
16  
17  
18  
19  
20  
21  
22  
23  
24  
25  
26  
27  
28  
29  
30  
31  
32  
33  
34  
35  
36  
37  
38  
39  
40  
41  
42  
43  
44  
45  
46  
47  
48  
49  
50  
51  
52  
53  
54  
55  
56  
57  
58  
59  
60

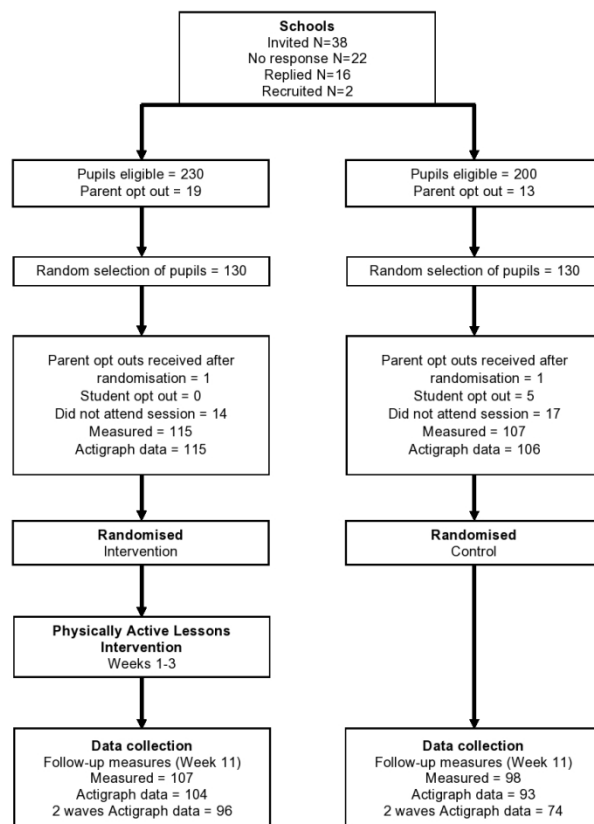

Figure 2. CONSORT flow chart of pilot study participant recruitment (schools and students).

104x148mm (300 x 300 DPI)

**Supplementary Table 1.** Descriptive, recruitment and retention statistics of student participants in feasibility and pilot studies.

|                                         | Feasibility Study | Pilot Study<br>– Control | Pilot Study<br>– Intervention |
|-----------------------------------------|-------------------|--------------------------|-------------------------------|
| N schools                               | 1                 | 1                        | 1                             |
| N students invited                      | 360               | 200                      | 230                           |
| N parent opt out                        | 25                | 13                       | 19                            |
| N students randomly selected            | 120*              | 130*                     | 130*                          |
| N student non assent                    | 7                 | 5                        | 0                             |
| N student non attendance                | 11                | 17                       | 14                            |
| N students assented                     | 99                | 107                      | 115                           |
| N two time points                       | 91                | 98                       | 107                           |
| N accepted monitor at two time points   | 91                | 93                       | 104                           |
| N with sufficient PA at two time points | 76                | 74                       | 96                            |
| Age (years)                             | 13.0 (1.1)        | 13.1 (0.6)               | 12.7 (1.0)                    |
| Sex: N (% male)                         | 51 (52)           | 53 (50)                  | 58 (50)                       |
| Height (cm)                             | 158.6 (8.7)       | 159.6 (8.9)              | 156.2 (9.8)                   |
| Weight (kg)                             | 51.9 (14.9)       | 54.1 (13.7)              | 48.1 (10.4)                   |
| BMI percentile                          | 56.8 (30.8)       | 63.2 (29.4)              | 57.6 (28.2)                   |
| % overweight/obese                      | 26.6              | 29.0                     | 19.1                          |

PA: physical activity

\*After random selection, a small number of parent opt-out replies were received for students that had been randomly selected for evaluation measures (feasibility study = 3, pilot control school = 1, pilot intervention school = 1), as such, the number of students randomly selected who were eligible to assent were: feasibility study = 117, pilot control school = 129, pilot intervention school = 129.

**Supplementary Table 2.** Descriptive statistics of schools and teacher participants in feasibility and pilot studies.

|                                             | Feasibility Study | Pilot Study – Control | Pilot Study – Intervention |
|---------------------------------------------|-------------------|-----------------------|----------------------------|
| <b>School information</b>                   |                   |                       |                            |
| Students per year group (for years 7, 8, 9) | 180               | 100                   | 115                        |
| Ofsted rating                               | 2 (Good)          | 2 (Good)              | 2 (Good)                   |
| % pupils eligible for free school meals     | 20.5%             | 36.2%                 | 21.4%                      |
| % pupils with special education needs       | 3.6%              | 0.9%                  | 1.9%                       |
| <b>Teacher information</b>                  |                   |                       |                            |
| <b>N teachers invited</b>                   | 15                | 32                    | 36                         |
| <b>N teachers assented</b>                  | 13                | 32                    | 36 <sup>a</sup>            |
| <b>Age Category: N (%)</b>                  |                   |                       |                            |
| 18-24 years                                 | 1 (17)            | 6 (19)                | 1 (3)                      |
| 25-34 years                                 | 2 (33)            | 7 (22)                | 5 (14)                     |
| 35-44 years                                 | 2 (33)            | 9 (28)                | 7 (19)                     |
| 44-45 years                                 | 1 (17)            | 9 (28)                | 11 (31)                    |
| 55-64 years                                 | 0                 | 1 (3)                 | 3 (8)                      |
| 65 years +                                  | 0                 | 0                     | 0                          |
| <b>N (%) male</b>                           | 2 (33)            | 10 (31)               | 10 (28)                    |
| <b>Teaching Experience: N (%)</b>           |                   |                       |                            |
| < 1 year                                    | 1 (17)            | 8 (25)                | 0                          |
| 2-5 years                                   | 2 (33)            | 7 (22)                | 6 (17)                     |
| 6-10 years                                  | 2 (33)            | 5 (16)                | 7 (19)                     |
| >10 years                                   | 0                 | 10 (31)               | 13 (36)                    |
| <b>Current active lesson delivery N (%)</b> |                   |                       |                            |
| Never/rarely                                | 3 (50)            | 5 (16)                | 5 (14)                     |
| 1-2 times / month                           | 2 (33)            | 6 (19)                | 7 (19)                     |
| 1-2 times / week                            | 1 (17)            | 8 (25)                | 5 (14)                     |
| 3-4 times / week                            | 0                 | 6 (19)                | 3 (8)                      |
| > once per day                              | 0                 | 6 (19)                | 6 (17)                     |

<sup>a</sup>27 teachers attended the research team's study introduction and completed baseline questionnaires. A further 9 teachers consented at training session 1 or 2 and did not provide baseline data.



**Supplementary Table 3.** Teacher feedback on the PAL training programme; mean (SD).

|                                                                                                 | Pilot Study – Intervention School |                    |                                              |                                              |
|-------------------------------------------------------------------------------------------------|-----------------------------------|--------------------|----------------------------------------------|----------------------------------------------|
|                                                                                                 | Feasibility Study (n=9)           | Whole Group (n=33) | Baseline PAL delivery < once per week (n=11) | Baseline PAL delivery ≥ once per week (n=14) |
| Usefulness of training in preparing you to deliver PAL<br>(1=not useful, 7=very useful)         | 5.3 (0.5)                         | 3.1 (1.4)          | 3.9 (1.6)                                    | 2.5 (1.1)                                    |
| Appropriateness of depth and scope of training<br>(1=not appropriate, 7=very appropriate)       | 5.2 (0.7)                         | 3.1 (1.4)          | 3.6 (1.6)                                    | 2.7 (1.2)                                    |
| Appropriateness of programme materials and resources<br>(1=not appropriate, 7=very appropriate) | 5.6 (1.3)                         | 2.8 (1.4)          | 3.5 (1.6)                                    | 2.4 (1.2)                                    |
| Clarity of program materials and resources<br>(1=not clear, 7=very clear)                       | 6.0 (0.7)                         | 3.7 (1.2)          | 4.4 (1.3)                                    | 3.4 (1.1)                                    |
| Relevance of training for your lessons<br>(1=not relevant, 7=very relevant)                     | 5.3 (1.1)                         | 2.9 (1.4)          | 3.6 (1.4)                                    | 2.4 (1.4)                                    |
| Would you recommend the training to other teachers?<br>N (%) yes                                | 9 (100)                           | 15 (45)            | 7 (64%)                                      | 4 (29%)                                      |

## Outdoor Active Lesson Examples

1. <https://www.ltl.org.uk/pdf/Natural-Equations-2018-COMLETE1518623029.pdf>
2. <https://www.ltl.org.uk/pdf/Fires-and-Cooking-Activity1421850222.pdf>

## Indoor Active Lesson Examples

### A. Jigsaw

*What is it?* The jigsaw is a cooperative learning strategy (one of several) whereby, as with a jigsaw puzzle, each piece (each student's part) is essential for the complete picture (full understanding of the final product). Here, if each student's part is essential then arguably, each student is essential!

*Implications for classroom layout:* There is minimal impact on classroom layout. Desk should be arranged together so students can sit together in small groups and be able to move between groups.

*How does it work?*

1. Divide students into 5 or 6-person jigsaw groups. Ideally these groups should be diverse in terms of gender, race/ethnicity and ability.
2. These groups are the 'Home teams'. In each home team, each team member should be given a letter (e.g. A, B, C etc.)
3. Team members then join their **Jigsaw team** e.g. all the A's, B's etc. get together. This will require them moving to their jigsaw teams. These jigsaw teams are responsible for discussing and understanding a pre-determined aspect or answering a particular task. For instance, a reading may be divided into several parts with each jigsaw team taking one of those parts.
4. As a teacher, you can move between each jigsaw team to ensure they are addressing the task in its entirety and the whole jigsaw team develops an understanding of it.

- 1  
2  
3 5. Jigsaw teams then return to back to their home teams to discuss what was learnt in the  
4  
5 jigsaw team. **Each student will present her or his segment to the group** so that all learn  
6  
7 from each other.  
8  
9

### 10 *Benefits*

- 13 • Learn a lot of material quickly
- 14
- 15 • Students are held individually accountable for their learning
- 16
- 17 • It helps to maximise student collaboration
- 18
- 19 • Encourages higher order and critical thinking skills.
- 20  
21  
22  
23  
24  
25

### 26 B. Active Voting

27  
28 *What is it?* This notion of Active Voting is useful for exploring differing and diverse opinions on  
29 particular issues. It can lead into a specific topic and gauge pupil understanding and critical thought  
30 of the issue in question. It requires pupils to adopt a view on the issue and identify a reason for the  
31 stance they take. Moreover, it will allow everyone to be heard, promoting student voice (even if  
32 they choose not to speak). To facilitate Active Voting, pupils need to be confronted with levels of  
33 ambiguity and grey areas, which helps them to see that opinions often have to be justified with  
34 informed knowledge of the matter under discussion.  
35  
36  
37  
38  
39  
40  
41  
42  
43

44  
45 *Implications for classroom layout:* Each of the four key statements will need to be positioned in one of  
46 corners of a room. These statements include: Strongly agree, agree, disagree, and strongly disagree.  
47  
48 When an issue is raised, pupils will then move to stand/sit in the corner that best reflects their  
49 views and with those who share the same opinion/perspective.  
50  
51  
52

### 53 *How does it work?*

- 54  
55 1. A range of issues (related to the content being delivered) should be read out in turn by the  
56  
57 teacher.  
58  
59  
60

- 1
- 2
- 3 2. Pupils are then given time to consider their opinion.
- 4
- 5 3. Pupils then move to the corner that best describes how they feel about what was read out.
- 6
- 7 Pupils should be reminded that there are no right or wrong answers.
- 8
- 9
- 10 4. What is read out (e.g. a particular statement) should aim to evoke a range of responses.
- 11
- 12 5. When pupils move to the corner that best represent their views on the statement, they
- 13
- 14 should be encouraged to explain why they feel that way with others in that group. General
- 15
- 16 perspectives can be obtained from all corners.
- 17
- 18 6. Teachers may wish to introduce subsidiary questions to draw out more complex issues and
- 19
- 20 to refine the initial statement/problem/issues being discussed.
- 21
- 22
- 23 7. Pupils are allowed to move during the discussion of each statement if issues arrive that
- 24
- 25 challenge their original opinion.
- 26
- 27
- 28 8. If pupils do switch then they should be encouraged to explain why.
- 29

### 30 *Benefits*

31  
32  
33 Developing thinking and decision making skills  
34  
35  
36  
37  
38  
39  
40  
41  
42  
43  
44  
45  
46  
47  
48  
49  
50  
51  
52  
53  
54  
55  
56  
57  
58  
59  
60

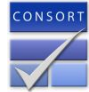

## CONSORT 2010 checklist of information to include when reporting a pilot or feasibility trial\*

| Section/Topic                    | Item No | Checklist item                                                                                                                                                                              | Reported on page No |
|----------------------------------|---------|---------------------------------------------------------------------------------------------------------------------------------------------------------------------------------------------|---------------------|
| <b>Title and abstract</b>        |         |                                                                                                                                                                                             |                     |
|                                  | 1a      | Identification as a pilot or feasibility randomised trial in the title                                                                                                                      | 1                   |
|                                  | 1b      | Structured summary of pilot trial design, methods, results, and conclusions (for specific guidance see CONSORT abstract extension for pilot trials)                                         | 2-3                 |
| <b>Introduction</b>              |         |                                                                                                                                                                                             |                     |
| Background and objectives        | 2a      | Scientific background and explanation of rationale for future definitive trial, and reasons for randomised pilot trial                                                                      | 4-5, 11-12          |
|                                  | 2b      | Specific objectives or research questions for pilot trial                                                                                                                                   | 12                  |
| <b>Methods</b>                   |         |                                                                                                                                                                                             |                     |
| Trial design                     | 3a      | Description of pilot trial design (such as parallel, factorial) including allocation ratio                                                                                                  | 13                  |
|                                  | 3b      | Important changes to methods after pilot trial commencement (such as eligibility criteria), with reasons                                                                                    | 13                  |
| Participants                     | 4a      | Eligibility criteria for participants                                                                                                                                                       | 5-6, 13             |
|                                  | 4b      | Settings and locations where the data were collected                                                                                                                                        | 5, 13               |
|                                  | 4c      | How participants were identified and consented                                                                                                                                              | 6, 13               |
| Interventions                    | 5       | The interventions for each group with sufficient details to allow replication, including how and when they were actually administered                                                       | 30                  |
| Outcomes                         | 6a      | Completely defined prespecified assessments or measurements to address each pilot trial objective specified in 2b, including how and when they were assessed                                | 7-9, 14-15, 30      |
|                                  | 6b      | Any changes to pilot trial assessments or measurements after the pilot trial commenced, with reasons                                                                                        | N/A                 |
|                                  | 6c      | If applicable, prespecified criteria used to judge whether, or how, to proceed with future definitive trial                                                                                 | N/A                 |
| Sample size                      | 7a      | Rationale for numbers in the pilot trial                                                                                                                                                    | 6, 13               |
|                                  | 7b      | When applicable, explanation of any interim analyses and stopping guidelines                                                                                                                | N/A                 |
| Randomisation:                   |         |                                                                                                                                                                                             |                     |
| Sequence generation              | 8a      | Method used to generate the random allocation sequence                                                                                                                                      | 13                  |
|                                  | 8b      | Type of randomisation(s); details of any restriction (such as blocking and block size)                                                                                                      | N/A                 |
| Allocation concealment mechanism | 9       | Mechanism used to implement the random allocation sequence (such as sequentially numbered containers), describing any steps taken to conceal the sequence until interventions were assigned | N/A                 |

|                                                      |     |                                                                                                                                                                                       |                         |
|------------------------------------------------------|-----|---------------------------------------------------------------------------------------------------------------------------------------------------------------------------------------|-------------------------|
| Implementation                                       | 10  | Who generated the random allocation sequence, who enrolled participants, and who assigned participants to interventions                                                               | 13                      |
| Blinding                                             | 11a | If done, who was blinded after assignment to interventions (for example, participants, care providers, those assessing outcomes) and how                                              | 13                      |
|                                                      | 11b | If relevant, description of the similarity of interventions                                                                                                                           | N/A                     |
| Statistical methods                                  | 12  | Methods used to address each pilot trial objective whether qualitative or quantitative                                                                                                | 7-9, 14-15, 30          |
| <b>Results</b>                                       |     |                                                                                                                                                                                       |                         |
| Participant flow (a diagram is strongly recommended) | 13a | For each group, the numbers of participants who were approached and/or assessed for eligibility, randomly assigned, received intended treatment, and were assessed for each objective | 13, Figure 2            |
|                                                      | 13b | For each group, losses and exclusions after randomisation, together with reasons                                                                                                      | Figure 2                |
| Recruitment                                          | 14a | Dates defining the periods of recruitment and follow-up                                                                                                                               | Figure 2                |
|                                                      | 14b | Why the pilot trial ended or was stopped                                                                                                                                              | N/A                     |
| Baseline data                                        | 15  | A table showing baseline demographic and clinical characteristics for each group                                                                                                      | Supp file 1 (pages 1-2) |
| Numbers analysed                                     | 16  | For each objective, number of participants (denominator) included in each analysis. If relevant, these numbers should be by randomised group                                          | 31-33, figure 2         |
| Outcomes and estimation                              | 17  | For each objective, results including expressions of uncertainty (such as 95% confidence interval) for any estimates. If relevant, these results should be by randomised group        | 31-33                   |
| Ancillary analyses                                   | 18  | Results of any other analyses performed that could be used to inform the future definitive trial                                                                                      | N/A                     |
| Harms                                                | 19  | All important harms or unintended effects in each group (for specific guidance see CONSORT for harms)                                                                                 | N/A                     |
|                                                      | 19a | If relevant, other important unintended consequences                                                                                                                                  | N/A                     |
| <b>Discussion</b>                                    |     |                                                                                                                                                                                       |                         |
| Limitations                                          | 20  | Pilot trial limitations, addressing sources of potential bias and remaining uncertainty about feasibility                                                                             | 22                      |
| Generalisability                                     | 21  | Generalisability (applicability) of pilot trial methods and findings to future definitive trial and other studies                                                                     | 22-23                   |
| Interpretation                                       | 22  | Interpretation consistent with pilot trial objectives and findings, balancing potential benefits and harms, and considering other relevant evidence                                   | 19-23                   |
|                                                      | 22a | Implications for progression from pilot to future definitive trial, including any proposed amendments                                                                                 | 22-23                   |
| <b>Other information</b>                             |     |                                                                                                                                                                                       |                         |
| Registration                                         | 23  | Registration number for pilot trial and name of trial registry                                                                                                                        | 5                       |
| Protocol                                             | 24  | Where the pilot trial protocol can be accessed, if available                                                                                                                          | 5                       |
| Funding                                              | 25  | Sources of funding and other support (such as supply of drugs), role of funders                                                                                                       | 3, 24                   |
|                                                      | 26  | Ethical approval or approval by research review committee, confirmed with reference number                                                                                            | 5                       |

1  
2  
3  
4  
5  
6  
7  
8  
9  
10  
11  
12  
13  
14  
15  
16  
17  
18  
19  
20  
21  
22  
23  
24  
25  
26  
27  
28  
29  
30  
31  
32  
33  
34  
35  
36  
37  
38  
39  
40  
41  
42  
43  
44  
45  
46

Citation: Eldridge SM, Chan CL, Campbell MJ, Bond CM, Hopewell S, Thabane L, et al. CONSORT 2010 statement: extension to randomised pilot and feasibility trials. BMJ. 2016;355.  
\*We strongly recommend reading this statement in conjunction with the CONSORT 2010, extension to randomised pilot and feasibility trials, Explanation and Elaboration for important clarifications on all the items. If relevant, we also recommend reading CONSORT extensions for cluster randomised trials, non-inferiority and equivalence trials, non-pharmacological treatments, herbal interventions, and pragmatic trials. Additional extensions are forthcoming: for those and for up to date references relevant to this checklist, see [www.consort-statement.org](http://www.consort-statement.org).

For peer review only

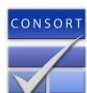

## CONSORT 2010 checklist of information to include when reporting a pilot or feasibility randomized trial in a journal or conference abstract

| Item               | Description                                                                                                 | Reported on line number |
|--------------------|-------------------------------------------------------------------------------------------------------------|-------------------------|
| Title              | Identification of study as randomised pilot or feasibility trial                                            | 1-2                     |
| Authors *          | Contact details for the corresponding author                                                                | 11                      |
| Trial design       | Description of pilot trial design (eg, parallel, cluster)                                                   | 22                      |
| Methods            |                                                                                                             |                         |
| Participants       | Eligibility criteria for participants and the settings where the pilot trial was conducted                  | 21                      |
| Interventions      | Interventions intended for each group                                                                       | 27-30                   |
| Objective          | Specific objectives of the pilot trial                                                                      | 18-20                   |
| Outcome            | Prespecified assessment or measurement to address the pilot trial objectives**                              | 31-34                   |
| Randomization      | How participants were allocated to interventions                                                            | 22                      |
| Blinding (masking) | Whether or not participants, care givers, and those assessing the outcomes were blinded to group assignment | 22-23                   |
| Results            |                                                                                                             |                         |
| Numbers randomized | Number of participants screened and randomised to each group for the pilot trial objectives**               | N/A                     |
| Recruitment        | Trial status†                                                                                               | N/A                     |
| Numbers analysed   | Number of participants analysed in each group for the pilot objectives**                                    | N/A                     |
| Outcome            | Results for the pilot objectives, including any expressions of uncertainty**                                | 35-40                   |
| Harms              | Important adverse events or side effects                                                                    | N/A                     |
| Conclusions        | General interpretation of the results of pilot trial and their implications for the future definitive trial | 41-43                   |
| Trial registration | Registration number for pilot trial and name of trial register                                              | 44                      |
| Funding            | Source of funding for pilot trial                                                                           | 45                      |

Citation: Eldridge SM, Chan CL, Campbell MJ, Bond CM, Hopewell S, Thabane L, et al. CONSORT 2010 statement: extension to randomised pilot and feasibility trials. *BMJ*. 2016;355.

*\*this item is specific to conference abstracts*

*\*\*Space permitting, list all pilot trial objectives and give the results for each. Otherwise, report those that are a priori agreed as the most important to the decision to proceed with the future definitive RCT.*

*†For conference abstracts.*



# BMJ Open

## Introducing physically active lessons in UK secondary schools: feasibility study and pilot cluster-randomised controlled trial

|                                 |                                                                                                                                                                                                                                                                                                                                                                                                                                                                                                                                                                                                                                                           |
|---------------------------------|-----------------------------------------------------------------------------------------------------------------------------------------------------------------------------------------------------------------------------------------------------------------------------------------------------------------------------------------------------------------------------------------------------------------------------------------------------------------------------------------------------------------------------------------------------------------------------------------------------------------------------------------------------------|
| Journal:                        | <i>BMJ Open</i>                                                                                                                                                                                                                                                                                                                                                                                                                                                                                                                                                                                                                                           |
| Manuscript ID                   | bmjopen-2018-025080.R2                                                                                                                                                                                                                                                                                                                                                                                                                                                                                                                                                                                                                                    |
| Article Type:                   | Research                                                                                                                                                                                                                                                                                                                                                                                                                                                                                                                                                                                                                                                  |
| Date Submitted by the Author:   | 14-Feb-2019                                                                                                                                                                                                                                                                                                                                                                                                                                                                                                                                                                                                                                               |
| Complete List of Authors:       | Gammon, Catherine; University of Cambridge, MRC Epidemiology Unit<br>Morton, Katie; University of Cambridge, MRC Epidemiology Unit<br>Atkin, Andrew; University of East Anglia Faculty of Medicine and Health Sciences; University of Cambridge, MRC Epidemiology Unit<br>Corder, Kirsten; University of Cambridge, MRC Epidemiology Unit<br>Daly-Smith, Andy; Leeds Beckett University<br>Quarmby, Thomas; Leeds Beckett University<br>Suhrccke, Marc; University of York Centre for Health Economics,<br>Turner, David; University of East Anglia, Public Health and Primary Care<br>van Sluijs, Esther; University of Cambridge, MRC Epidemiology Unit |
| <b>Primary Subject Heading</b>: | Epidemiology                                                                                                                                                                                                                                                                                                                                                                                                                                                                                                                                                                                                                                              |
| Secondary Subject Heading:      | Public health                                                                                                                                                                                                                                                                                                                                                                                                                                                                                                                                                                                                                                             |
| Keywords:                       | Active lessons, Movement integration, Physical activity, Sedentary time, School health                                                                                                                                                                                                                                                                                                                                                                                                                                                                                                                                                                    |
|                                 |                                                                                                                                                                                                                                                                                                                                                                                                                                                                                                                                                                                                                                                           |

SCHOLARONE™  
Manuscripts

1  
2  
3  
4 1 **Introducing physically active lessons in UK secondary schools: feasibility**  
5  
6  
7  
8 2 **study and pilot cluster-randomised controlled trial**  
9

10  
11  
12 3 Catherine Gammon<sup>1</sup>, Katie Morton<sup>1</sup>, Andrew J Atkin<sup>1,2</sup>, Kirsten Corder<sup>1</sup>, Andy Daly-  
13  
14  
15 4 Smith<sup>3</sup>, Thomas Quarmby<sup>3</sup>, Marc Suhrcke, David Turner<sup>2</sup>, Esther van Sluijs<sup>1\*</sup>

16  
17  
18  
19  
20 5 <sup>1</sup> MRC Epidemiology Unit and UKCRC Centre for Diet and Activity Research (CEDAR),  
21  
22  
23 6 University of Cambridge, Cambridge, UK

24  
25  
26  
27 7 <sup>2</sup> School of Health Sciences, University of East Anglia, Norwich, UK

28  
29  
30  
31 8 <sup>3</sup> Carnegie School of Sport, Leeds Beckett University, Leeds, UK

32  
33  
34  
35 9 <sup>4</sup> Centre for Health Economics, University of York, York, UK

36  
37  
38  
39 10

40  
41  
42 11 \* Corresponding author: Dr Esther van Sluijs ([ev234@medschl.cam.ac.uk](mailto:ev234@medschl.cam.ac.uk); 01223 769189)

43  
44  
45  
46 12 Address: UKCRC Centre for Diet and Activity Research (CEDAR), MRC Epidemiology Unit,

47  
48  
49 13 University of Cambridge School of Clinical Medicine, Box 285 Institute of Metabolic Science,

50  
51  
52 14 Cambridge Biomedical Campus, Cambridge, CB2 0QQ, UK

53  
54  
55  
56 15 **Keywords:** Active lessons, movement integration, physical activity, sedentary time, school

57  
58  
59  
60 16 health

1  
2  
3  
4  
5  
6  
7  
8  
9  
10  
11  
12  
13  
14  
15  
16  
17  
18  
19  
20  
21  
22  
23  
24  
25  
26  
27  
28  
29  
30  
31  
32  
33  
34  
35  
36  
37  
38  
39  
40  
41  
42  
43  
44  
45  
46  
47  
48  
49  
50  
51  
52  
53  
54  
55  
56  
57  
58  
59  
60

17 **Word count: 5,717**

For peer review only

1  
2  
3  
4 18 **Abstract**  
5  
6

7 19 **Objectives:** Assess feasibility, acceptability and costs of delivering a physically active lessons  
8  
9  
10 20 (PAL) training programme to secondary school teachers and explore preliminary effectiveness  
11  
12  
13  
14 21 for reducing pupils' sedentary time.  
15  
16

17 22 **Design and setting:** Secondary schools in East England; one school participated in a pre-post  
18  
19  
20 23 feasibility study, two in a pilot cluster-randomised controlled trial. In the pilot trial, blinding to  
21  
22  
23  
24 24 group assignment was not possible.  
25  
26

27 25 **Participants:** Across studies, 321 randomly selected students (51% male; mean age: 12.9  
28  
29  
30 26 years), 78 teachers (35% male) and two assistant head-teachers enrolled; 296(92%) students,  
31  
32  
33  
34 27 69(88%) teachers and two assistant head teachers completed the studies.  
35  
36  
37

38 28 **Intervention:** PAL training was delivered to teachers over two after-school sessions. Teachers  
39  
40  
41 29 were made aware of how to integrate movement into lessons; strategies included students  
42  
43  
44 30 collecting data from the environment for class activities, and completing activities posted on  
45  
46  
47  
48 31 classroom walls, instead of sitting at desks.  
49  
50

51 32 **Primary and secondary outcomes:** Quantitative and qualitative data were collected to assess  
52  
53  
54 33 feasibility and acceptability of PAL training and delivery. Outcomes were assessed at baseline  
55  
56  
57  
58 34 and ~8 weeks post-training; measures included accelerometer-assessed activity, self-  
59  
60

1  
2  
3  
4 35 reported well-being, and observations of time-on-task. Process evaluation was conducted at  
5  
6  
7 36 follow-up.  
8  
9

10 37 **Results:** In the feasibility study, teachers reported good acceptability of PAL training and mixed  
11  
12  
13 38 experiences of delivering PAL. In the pilot study, teachers' acceptability of training was lower  
14  
15  
16  
17 39 and teachers identified aspects of the training in need of review, including the outdoor PAL  
18  
19  
20 40 training and learning challenge of PAL strategies. In both studies, students and assistant head-  
21  
22  
23 41 teachers reported good acceptability of the intervention. Preliminary effectiveness for reducing  
24  
25  
26 42 students' sedentary time was not demonstrated in either study.  
27  
28  
29

30 43 **Conclusions:** No evidence of preliminary effectiveness on the primary outcome and mixed  
31  
32  
33 44 reports of teachers' acceptability of PAL training suggest the need to review the training. The  
34  
35  
36 45 results do not support continuation of research with the current intervention.  
37  
38  
39

40 46 **Trial registration:** ISRCTN registry; ISRCTN38409550.  
41  
42  
43

44 47 **Funding:** Department of Health Policy Research Programme (PR-R5-0213-25001).  
45  
46  
47  
48  
49

50  
51  
52 49 **Article Summary**  
53  
54  
55

56 50 **Strength and limitations of this study**  
57  
58  
59  
60

- 1  
2  
3  
4 51 • We completed thorough feasibility and pilot testing work to inform the decision of whether  
5  
6  
7 52 to progress with the current intervention and its evaluation.  
8  
9  
10 53 • We collected quantitative and qualitative data which provided valuable information on  
11  
12  
13 54 contextual influences and allowed us to address research questions more  
14  
15  
16 55 comprehensively.  
17  
18  
19 56 • We were unable to collect all planned follow-up measures from teachers and students in  
20  
21  
22 57 feasibility study, including teacher follow-up questionnaires and class observations of time-  
23  
24  
25  
26 58 on-task.  
27  
28  
29 59 • We did not carry out longer-term follow-up measures of teacher acceptability and  
30  
31  
32 60 physically active lesson delivery (i.e., beyond ~8 weeks post-training); longer follow-up  
33  
34  
35 61 would have provided an indication of the sustainability of the intervention.  
36  
37  
38  
39  
40  
41  
42  
43  
44  
45  
46  
47  
48  
49  
50  
51  
52  
53  
54  
55  
56  
57  
58  
59  
60

## 62 INTRODUCTION

63 Globally, most adolescents (~80%) do not achieve government-recommended physical  
64 activity guidelines[1] and engage in high levels of sedentary behaviour[2]. As such,  
65 interventions are needed to support youth in achieving a healthy activity profile.  
66 Secondary/high schools present an opportunity for the implementation of activity interventions,  
67 as during school hours activity is lower and sedentary time is higher than during other  
68 segments of an adolescent's week[3, 4].

69 The Creating Active School Environments (CASE) project is a three-year research programme  
70 funded by the UK Department of Health Policy Research Programme. CASE aims to identify  
71 environmental strategies to help adolescents move more and sit less during school hours.  
72 Initial phases of CASE involved a systematic literature review[5] and secondary data  
73 analysis[6] to identify promising secondary school-based activity interventions. Morton and  
74 colleagues (2017) subsequently completed a Delphi study, involving stakeholders in the  
75 prioritisation of interventions. Physically active lessons (PAL) were perceived to be the most  
76 feasible, acceptable and cost-effective intervention for secondary school settings[7]; these  
77 results informed the final, feasibility and pilot-testing phase of CASE.

78 PAL are a pedagogical approach whereby activity supports the delivery of academic  
79 material[8]. During PAL, movement is integrated into teaching and as such, PAL are distinct

1  
2  
3  
4 80 from 'brain/movement breaks', when activity is separate from learning. Evidence from primary  
5  
6  
7 81 schools indicates that PAL can improve physical activity, academic achievement and lesson  
8  
9  
10 82 enjoyment[9-12]. To our knowledge, only two studies have trialled the use of PAL among  
11  
12  
13 83 adolescents[13, 14]. Helgeson (2013) reported no influence of the 'Energizers' PAL  
14  
15  
16 84 programme on reading comprehension scores among junior high school students and did not  
17  
18  
19 85 explore activity levels as a primary outcome[13]. Cothran and colleagues (2010) reported on  
20  
21  
22 86 primary and secondary/high school teachers' experiences of a one-year movement integration  
23  
24  
25  
26 87 intervention. Compared to primary school teachers, secondary teachers faced different  
27  
28  
29 88 challenges when attempting to integrate activity into lessons, in particular standardised testing  
30  
31  
32 89 pressures and students not staying with one teacher all day (as typically is the case in primary  
33  
34  
35 90 schools)[14]. Cothran and colleagues did not measure student activity behaviours as an  
36  
37  
38 91 intervention outcome[14]. The positive effects of PAL reported for primary students suggest  
39  
40  
41  
42 92 there is value in exploring if secondary students can experience similar benefits. Given the  
43  
44  
45 93 organisational and environmental differences between primary and secondary schools, it is  
46  
47  
48 94 important to conduct high quality feasibility and pilot testing of secondary school PAL  
49  
50  
51 95 interventions.

52  
53  
54  
55 96 A PAL training programme for secondary school teachers was tested in a feasibility study and  
56  
57  
58 97 a cluster-randomised controlled pilot study. The studies aimed to explore the feasibility,  
59  
60



1  
2  
3 98 acceptability, costs, and preliminary effectiveness of a PAL training programme for secondary  
4  
5  
6 99 teachers. Acceptability of study processes was also examined, in anticipation of conducting a  
7  
8  
9  
10 100 subsequent full trial. The feasibility study tested the intervention among maths and English  
11  
12  
13 101 teachers at one school, the pilot study tested the intervention among all-subject teachers and  
14  
15  
16 102 as part of a controlled trial. This paper presents the feasibility study and pilot study followed  
17  
18  
19 103 by an overall discussion and conclusion (ISRCTN38409550).  
20  
21  
22

## 23 104 1. FEASIBILITY STUDY

24  
25  
26  
27 105 Ethical approval for both studies was granted by the University of Cambridge's School of the  
28  
29  
30 106 Humanities and Social Sciences. The aim of the feasibility study was to assess (i) the  
31  
32  
33 107 feasibility, acceptability, costs, and preliminary effectiveness (for reducing sedentary time and  
34  
35  
36 108 improving wellbeing and time-on-task among students) of a PAL training programme for  
37  
38  
39 109 secondary school teachers, and (ii) the feasibility and acceptability of study procedures.  
40  
41  
42  
43  
44 110  
45  
46  
47

### 48 111 Feasibility Study - Methods

#### 49 50 51 112 Recruitment

52  
53  
54  
55 113 Potential schools were identified from previous local research and approached with study  
56  
57  
58 114 information (n=2). One mixed-sex, non fee-paying secondary school participated. The head  
59  
60

1  
2  
3  
4 115 teacher provided written consent for the intervention to be delivered to the teachers, elected  
5  
6  
7 116 for the intervention to be trialled with maths and English teachers, and chose years 7 and 9 to  
8  
9  
10 117 participate in study evaluation measures. The school were told they would be able to keep the  
11  
12  
13 118 PAL training resources.

14  
15  
16  
17 119 Parents of all Year 7 and 9 students (11-14 years) received study information and students  
18  
19  
20 120 were invited to participate in evaluation measures. Parents were given two weeks to opt out  
21  
22  
23 121 (passive parental consent) via email, freephone, or freepost. From the students who had not  
24  
25  
26 122 been opted out, 120 (sixty Year-7 and sixty Year-9 students; 50% male) were randomly  
27  
28  
29 123 selected for evaluation measures (using class lists and random number generating software).  
30  
31  
32  
33 124 The study's feasibility focus meant that a formal power calculation was not necessary to inform  
34  
35  
36 125 sample size; a sample of 60 participants per year is consistent with samples of similar  
37  
38  
39 126 studies[15]. Students provided written assent for evaluation measures.

40  
41  
42  
43 127 Maths and English teachers (n=15) received study information two weeks before the PAL  
44  
45  
46 128 training. The senior leadership team requested that all maths and English teachers attend the  
47  
48  
49 129 training. Teachers could choose to participate in the evaluation measures, those agreeing  
50  
51  
52  
53 130 provided written consent. Over five school days students received approximately five maths  
54  
55  
56 131 lessons and four English lessons.

57  
58  
59  
60 132 Intervention

1  
2  
3  
4 133 The PAL training was developed by a team with teacher training qualifications and experience  
5  
6  
7 134 in indoor (two trainers) and outdoor active learning (one trainer). The training was delivered at  
8  
9  
10 135 the intervention school between March and April, during pre-scheduled after-school teacher-  
11  
12  
13 136 training time. Table 1 outlines the training programme and example active lessons are  
14  
15  
16 137 published as supplementary material. The focus was on supporting teachers to adopt active  
17  
18  
19 138 pedagogical approaches (teaching strategies that incorporate activity), rather than providing  
20  
21  
22 139 new, PAL plans. The training was underpinned by aspects of social cognitive theory and aimed  
23  
24  
25  
26 140 to enhance teachers' self-efficacy in relation to PAL[16]. As such it drew from two prominent  
27  
28  
29 141 behaviour change techniques: barrier identification and modelling/demonstrating  
30  
31  
32 142 behaviour[17]. With the former, teachers were encouraged to identify barriers that might  
33  
34  
35 143 impact their ability to implement PAL and plan ways to overcome these. With the latter, the  
36  
37  
38 144 trainers demonstrated a plethora of PAL teaching strategies that teachers could employ in  
39  
40  
41  
42 145 their lessons. Figure 1 outlines the preliminary logic model of how the teacher-focused  
43  
44  
45 146 intervention could lead to changes in students' activity. Prior to the training, the research team  
46  
47  
48 147 visited the participating school and ascertained the availability of indoor and outdoor spaces  
49  
50  
51 148 and equipment that could be used for PAL. Syllabi for maths and English were requested to  
52  
53  
54 149 allow trainers to prepare relevant examples for the training.

55  
56  
57  
58 150 Measurements  
59  
60

1  
2  
3  
4 151 Table 1 outlines the timeline of study measures. Feasibility and acceptability were assessed  
5  
6  
7 152 using questionnaires and focus groups. Three focus groups (with five teachers, eight Year-7  
8  
9  
10 153 and four Year-9 students) and an interview with the assistant head teacher were completed  
11  
12  
13 154 using a semi-structured interview.

14  
15  
16  
17 155 *i. Evaluation of Intervention and Study*

18  
19  
20  
21 156 *Feasibility/acceptability of the intervention:* Questionnaire items and focus group questions  
22  
23  
24 157 asked about teachers' perceptions of the utility, value and relevance of the training (adapted  
25  
26  
27 158 from[18, 19]). Questionnaires asked if teachers would recommend the training to other  
28  
29  
30 159 teachers and provided free-text boxes for teachers to suggest improvements. Training session  
31  
32  
33 160 attendance rates were recorded.

34  
35  
36  
37 161 *Feasibility/acceptability of PAL delivery:* Questionnaire items and focus group questions asked  
38  
39  
40 162 teachers about classroom management during PAL, enjoyment of teaching PAL, time needed  
41  
42  
43 163 to prepare and deliver PAL, and barriers to PAL delivery (items from[20]).

44  
45  
46  
47 164 *Acceptability of PAL participation:* Questionnaire items and focus group questions asked  
48  
49  
50 165 students about their experience of PAL participation, enjoyment of PAL, their preference for  
51  
52  
53 166 active vs. desk-based lessons, and the best and worst things about PAL.  
54  
55  
56  
57  
58  
59  
60

1  
2  
3  
4 167 *Costs:* Teachers and students reported resources purchased to deliver/participate in PAL. The  
5  
6  
7 168 research team recorded time and costs associated with the training team's development and  
8  
9  
10 169 delivery of the intervention.

11  
12  
13  
14 170 *Study processes:* The research team made field notes on study processes that proved to be  
15  
16  
17 171 challenging or ineffective, for example, students struggling to understand a questionnaire item.

18  
19  
20  
21 172 *ii. Intervention Outcomes*

22  
23  
24 173 *Student anthropometry:* Anthropometric measures were completed by trained staff using  
25  
26  
27  
28 174 standard procedures. Height was measured using a stadiometer (Leicester height measure,  
29  
30  
31 175 Chasmors, Leicester, UK) to the nearest 0.1 cm, and weight was measured to the nearest 0.1  
32  
33  
34 176 kg (Tanita, type TBF-300A, Tokyo, Japan). The measurement stations were set up so that  
35  
36  
37 177 results were not visible to anyone except the measurement staff. Height, weight, sex, birthdate  
38  
39  
40 178 and measurement date were used to calculate participants' body mass index (BMI; kg/m<sup>2</sup>) and  
41  
42  
43  
44 179 BMI percentile.

45  
46  
47  
48 180 *Activity intensity:* Axivity AX3 triaxial wrist-worn accelerometers (non-dominant wrist) were  
49  
50  
51 181 used to measure activity behaviours. These devices have been used among a larger sample  
52  
53  
54 182 of Year-9 participants in the GoActive study[21] and the UK Biobank Cohort Study[22]. Wrist-  
55  
56  
57 183 worn monitors are validated for the assessment of energy expenditure in pediatric  
58  
59  
60

1  
2  
3  
4 184 populations[23] with higher participant compliance when compared to waist-worn  
5  
6  
7 185 accelerometers[24]. Participants were given verbal and written instructions on monitor wear,  
8  
9  
10 186 including that the monitor was waterproof and could be worn continuously for the next seven  
11  
12  
13 187 days (Monday to Monday).

14  
15  
16  
17 188 The first day of monitor wear was dropped[25]; included participants provided valid data for  
18  
19  
20 189  $\geq 80\%$  of school hours for  $\geq$ two school days, at baseline and follow-up[26-28]. Acceleration  
21  
22  
23 190 was recorded at 100Hz with a dynamic range of  $\pm 8g$ . Data from the monitors was downloaded  
24  
25  
26 191 in continuous waveform. Euclidean Norm Minus One (ENMO) represents acceleration  
27  
28  
29 192 magnitude at each measurement, accounting for the influence of gravity. ENMO thresholds  
30  
31  
32  
33 193 were used to classify activity intensities: time spent at 0-30 ENMO was classified as sedentary  
34  
35  
36 194 activity (equivalent to 1-1.5 METs); 30-210 ENMO as light-intensity activity (1.5-4 METs); 210-  
37  
38  
39 195 500 ENMO as moderate-intensity activity (4-7 METs), and above 500 ENMO as vigorous-  
40  
41  
42 196 intensity activity[29, 30].

43  
44  
45  
46 197 *Mental Health and Wellbeing:* Students completed questionnaire measures of positive and  
47  
48  
49 198 negative affect[31], academic efficacy, disruptive behaviour[32], enjoyment of school  
50  
51  
52  
53 199 classes[33] and health related quality of life[34-39] at baseline and follow-up. All  
54  
55  
56 200 questionnaires are validated for use with adolescents and were analysed according to  
57  
58  
59 201 published instructions[31, 32, 39].  
60

1  
2  
3  
4 202 *Time-on-task*: Students' time-on-task was assessed during three lessons by one member of  
5  
6  
7 203 the research team using a momentary time-sampling procedure (which incurs less bias than  
8  
9  
10 204 other sampling procedures[40, 41]). At the start of each observed class, the teacher asked all  
11  
12  
13 205 students participating in the study to raise their hands. From the students that raised their  
14  
15  
16 206 hands, the researcher identified two boys and two girls (when possible) to observe. The  
17  
18  
19 207 researcher chose students sitting in different areas of the classroom. Each student was  
20  
21  
22 208 observed once per minute, in a consistent order, for the duration of the lesson. Students'  
23  
24  
25 209 behaviour was coded as: (i) on-task, (ii) off-task-passive, (iii) off-task-motor, or (iv) off-task-  
26  
27  
28 210 noise[42]. The mean percentage of intervals recorded as 'on task' for observed students and  
29  
30  
31 211 classes was calculated and used as the outcome measure.  
32  
33  
34  
35  
36 212 Prior to classroom observations, a validation activity was completed where two researchers  
37  
38  
39 213 discussed definitions and concurrently coded student behaviour using four online videos.  
40  
41  
42 214 Observers' codes matched for 95% of observation intervals.  
43  
44  
45

## 46 215 Descriptive Statistics

47  
48  
49  
50 216 Descriptive statistics of the sample, primary and secondary outcomes, and quantitative  
51  
52  
53 217 measures of feasibility and acceptability are summarised. Focus group transcripts were  
54  
55  
56 218 reviewed; recurring comments and themes relevant to the research questions were identified.  
57  
58  
59  
60

219

## 220 Feasibility Study - Results

### 221 Recruitment and sample characteristics

222 Student and teacher recruitment and characteristics are summarised in supplementary tables

223 1 and 2. Of 120 students invited to participate in the evaluation measures, 99 were recruited,

224 with 91 (92%) providing data at baseline and follow-up. Students had a mean age of 13.0

225 ( $\pm 1.1$ ) years, 52% were male and 27% were classified as overweight/obese. Teachers were

226 predominantly female (67%) and below the age of 45 (83%).

### 227 Feasibility and Acceptability

228 Training session one was attended by 14 (out of 15) teachers (7 maths, 7 English), training

229 session two was attended by 12 teachers (7 maths, 5 English), 11 teachers attended both

230 sessions. Teacher feedback demonstrated acceptability of the training, with 100%

231 recommending the training to other teachers (supplementary table 3). Individual and collective

232 efficacy for delivering PAL improved from 2.7 to 3.2, and 2.4 to 3 (out of 4), respectively. At

233 follow-up,  $\geq$ eight teachers had attempted to deliver PAL. Teacher's goals for PAL delivery

234 averaged 2.1 (SD=1.0) lessons per week, with an average targeted reduction in sitting time of



1  
2  
3  
4 235 15.8 (SD=8.0) minutes. Some teachers reported positive experiences of delivering PAL, while  
5  
6  
7 236 others reported challenges (Text box 1).  
8  
9

10 237 Teacher-reported barriers included disruptive behaviour, lethargy and off-topic chatting,  
11  
12  
13 238 challenges re-focusing students after an active portion of class, and limited classroom space.  
14  
15

16 239 Teachers identified facilitators of PAL delivery as theirs and the students' enjoyment of PAL,  
17  
18  
19  
20 240 good weather allowing them to go outside, more classroom space and a more diligent group  
21  
22  
23 241 of students. Teachers reported  $\leq 15$  extra minutes were required to plan PAL, and a few extra  
24  
25  
26 242 minutes were needed to prepare students for PAL participation.  
27  
28

29  
30 243 Of the students who recalled participating in an active lesson (47%), most preferred PAL to  
31  
32  
33 244 desk-based lessons (70%; 19% indicated 'no preference') and 93% wanted teachers to  
34  
35  
36 245 continue delivering them. Students reported enjoying going outside and moving around (30%),  
37  
38  
39 246 that PAL were less boring/more fun than desk-based lessons (26%) and that they could  
40  
41  
42  
43 247 concentrate better (14%). Negative comments about PAL included lethargy (12%), more  
44  
45  
46 248 disruptive behaviour (9%), and less work achieved (12%; text box 1).  
47  
48

49  
50 249 The assistant head teacher felt the training was well-received and high-quality professional  
51  
52  
53 250 development. The school's reasons for participating in the project included the potential for  
54  
55  
56 251 improving students' mental health and the motivation to be innovative in the classroom. The  
57  
58  
59  
60

1  
2  
3 252 assistant head teacher commented that teaching staff had enjoyed taking students outside for

4  
5  
6  
7 253 lessons and the project had involved a low level of commitment from the school.

8  
9  
10 254 Costs

11  
12  
13  
14 255 Training delivery costed £910, comprised of £410 staff costs and £500 for training equipment.

15  
16  
17 256 Participants reported purchasing sticky tape (teacher, ~£2) and shoes and tights (student,

18  
19  
20  
21 257 ~£30).

22  
23  
24 258 Study Processes

25  
26  
27  
28 259 The majority of study procedures were completed successfully. Challenges encountered

29  
30  
31 260 included that students struggled to complete a blank timetable indicating when their Maths

32  
33  
34 261 and English lessons were, and despite efforts, we were unable to schedule follow-up

35  
36  
37 262 classroom observations. Teacher baseline questionnaire return was low and the follow-up

38  
39  
40  
41 263 focus group was conducted in a 15-minute timeslot due to late changes.

42  
43  
44  
45 264 Preliminary effectiveness

46  
47  
48  
49 265 Table 2 summarises baseline and follow-up data for all student measures. Sedentary time

50  
51  
52 266 increased by 8.7 minutes and time spent in light-intensity activity decreased by 8.1 minutes.

53  
54  
55 267 Minimal changes were observed in the mental health and wellbeing scores between baseline

56  
57  
58 268 and follow-up.

## 269 Feasibility Study - Reflections

270 The findings suggest it is feasible and acceptable to deliver a PAL training program to  
271 secondary school maths and English teachers. Importantly, the senior leadership  
272 representative was supportive of the training[43]. Secondary school teachers had mixed  
273 reports of delivering PAL, the identified barriers and facilitators were consistent with those  
274 previously reported[43]. It was noted that teacher acceptability of PAL delivery should be  
275 explored further in the next phase of intervention evaluation. The positive student response to  
276 PAL indicates acceptability and is consistent with results from PAL interventions in primary  
277 schools[44].

278 We were successful in recruiting and consenting participants, and the majority of evaluation  
279 measures were completed without problems. The retention of >90% of participants from  
280 baseline to follow-up suggests evaluation measures were acceptable. Suggested changes  
281 included scheduling all research activities at the start of the project and acquiring student  
282 timetables from the school's administration team.

283 Limitations of this feasibility study include the small sample size and the lack of control group,  
284 making it not possible to draw conclusions about the contribution of the intervention to the  
285 observed changes. The change in sedentary activity levels is inconsistent with previous  
286 research reporting that younger children's sedentary time on weekdays decreases between

1  
2  
3 287 spring and summer[45]. Increased negative feelings and lower wellbeing among students  
4  
5  
6 288 between March and June is consistent with typical changes observed in students' wellbeing  
7  
8  
9  
10 289 over a school term[46, 47].  
11  
12  
13  
14 290  
15  
16

## 17 291 **2. PILOT STUDY**

18  
19  
20  
21 292 Following successful implementation of the intervention in the feasibility study, we sought to  
22  
23  
24 293 extend our previous work and explore the potential value of conducting a full-scale randomised  
25  
26  
27 294 controlled trial. The aims of the pilot cluster-randomised controlled trial were (i) to assess the  
28  
29  
30 295 feasibility, acceptability, preliminary effectiveness and costs of delivering a PAL intervention  
31  
32  
33 296 at a whole-school level (to all subject teachers) and (ii) to test the acceptability of school-level  
34  
35  
36 297 randomisation.  
37  
38  
39  
40  
41 298  
42  
43  
44 299 **Pilot Study - Methods**

#### 45 46 47 48 300 **Recruitment and Randomisation**

49  
50  
51  
52 301 *Schools:* We aimed to recruit three schools - two intervention (to test whole-school delivery of  
53  
54  
55 302 the intervention in different settings) and one control (to test the acceptability of school-level  
56  
57  
58 303 randomisation). In June-July 2017, 26 non fee-paying, mixed gender, secondary schools in  
59  
60

1  
2  
3  
4 304 the East of England were emailed study information and invited to participate (the school that  
5  
6  
7 305 took part in the feasibility study was not invited to participate in the pilot study). The first three  
8  
9  
10 306 schools to agree were recruited; one school withdrew prior to student recruitment (and  
11  
12  
13 307 randomisation). We were unable to replace the school within an appropriate timeframe. After  
14  
15  
16 308 baseline measures, individuals separate from the research team performed a coin-toss to  
17  
18  
19 309 assign intervention and control schools. The nature of the intervention and goals of the  
20  
21  
22 310 evaluation measures meant it was not possible to blind participants. Due to differences in  
23  
24  
25  
26 311 follow-up measures between control and intervention schools, it was not possible to blind  
27  
28  
29 312 measurement staff at follow-up.

30  
31  
32  
33 313 *Students:* Recruitment proceeded as outlined for the feasibility study. Schools were asked to  
34  
35  
36 314 choose one younger year (7 or 8) and one older year (9 or 10) group to participate in evaluation  
37  
38  
39 315 measures. This would allow assessment of differential responses to the intervention by age.  
40  
41  
42 316 The intervention school selected Years 7 and 9 and the control school selected Years 8 and  
43  
44  
45  
46 317 9. Following feasibility study procedures, we randomly selected 130 students (50% male, 50%  
47  
48  
49 318 from each year) from each school for evaluation measures (based on feasibility study retention  
50  
51  
52 319 rates), with the aim of obtaining full data on 100 participants.

53  
54  
55  
56 320 *Teachers:* A teacher information and recruitment meeting was scheduled at both schools,  
57  
58  
59 321 during which a researcher introduced the study and distributed consent forms. Teachers were  
60

1  
2  
3  
4 322 advised by their senior leadership team that they would be required to attend the PAL training  
5  
6  
7 323 if allocated as the intervention school; all teachers were free to decide on participation in  
8  
9  
10 324 evaluation measures.

### 11 12 13 14 325 Intervention

15  
16  
17 326 Extending the feasibility study, the intervention was delivered to all subject teachers. Training  
18  
19  
20 327 all subject teachers is consistent with the whole-school approach recommended for activity  
21  
22  
23  
24 328 promotion and obesity prevention among youth[48, 49]. Given the acceptability of the training  
25  
26  
27 329 demonstrated in the feasibility study, the structure and goals of the training for the pilot study  
28  
29  
30 330 were similar. Minimal changes were made to the indoor training component, which focused  
31  
32  
33 331 on generic active learning strategies, applicable to any subject (e.g., different workstations  
34  
35  
36 332 around the classroom). In the feasibility study, the outdoor training component provided  
37  
38  
39  
40 333 multiple subject- and topic-specific lesson ideas; the inclusion of all subject teachers meant  
41  
42  
43 334 fewer subject-specific examples could be actively worked through during the pilot study  
44  
45  
46 335 training. One additional outdoor lessons trainer was involved to train the larger group of  
47  
48  
49 336 teachers.

### 50 51 52 53 337 Measurements

54  
55  
56  
57  
58  
59  
60

1  
2  
3  
4 338 Table 1 outlines the timeline of study measures; all data were collected at schools, during  
5  
6  
7 339 school hours. To increase teacher baseline questionnaire return, questionnaires were  
8  
9  
10 340 distributed during the pre-training teacher information meeting, and completed following  
11  
12  
13 341 consent. Data collection followed the same procedures as described for the feasibility study,  
14  
15  
16 342 except for the assessment of PAL dose and time on task.

17  
18  
19  
20 343 *PAL Dose:* A teacher timetable was created using school-provided student timetables,  
21  
22  
23 344 detailing their Year 7 and 9 lessons. During the student accelerometer assessment at follow-  
24  
25  
26 345 up, teachers were given their personalised timetable and asked 'please circle which of the  
27  
28  
29 346 listed Year 7 and/or 9 classes were (or will be) delivered as an active lesson.' Teachers  
30  
31  
32  
33 347 responses were used to calculate PAL dose. *Time on task:* Four lessons were observed at  
34  
35  
36 348 baseline and follow-up, at both schools. At baseline (prior to delivery of PAL training) the  
37  
38  
39 349 research team observed typical desk-based lessons. At follow-up, the research team asked  
40  
41  
42 350 to observe physically active lessons.

#### 43 44 45 46 351 Patient and Public Involvement

47  
48  
49  
50 352 In an earlier phase of CASE, opinions of key stakeholders regarding (i) suitable PA  
51  
52  
53 353 interventions for secondary schools and (ii) salient outcomes, were explored in a Delphi study  
54  
55  
56 354 ([7]). The decision to trial a PAL intervention and inclusion of mental health and time-on-task  
57  
58  
59 355 measures were informed by the Delphi study. While stakeholders were not involved in study

1  
2  
3  
4 356 design, conduct or recruitment, they reviewed questionnaires and provided feedback on  
5  
6  
7 357 qualitative findings. Student participants received a personal PA report and participating  
8  
9  
10 358 schools will be provided with a summary of the findings. Assistant head teachers commented  
11  
12  
13 359 on the time commitment of the intervention and teacher participants reported on time spent  
14  
15  
16 360 implementing intervention components.

## 20 361 Descriptive statistics

22  
23  
24 362 Descriptive statistics and focus group analysis proceeded as outlined for the feasibility study.  
25  
26  
27

## 28 363 **Pilot Study - Results**

29  
30  
31 364 Figure 2 shows the flow of participants, with further information on student and teacher  
32  
33  
34  
35 365 recruitment and sample characteristics in supplementary tables 1 and 2. Of the assenting  
36  
37  
38 366 students (n=222) 92% provided data at two time points. Half of the students were male and  
39  
40  
41 367 24% were classified as overweight/obese. The majority of teachers were female and >50% of  
42  
43  
44 368 staff reported delivering at least one PAL a week at baseline. At the intervention school, 30  
45  
46  
47  
48 369 and 33 teachers attended training session one and two, respectively (29 teachers attended  
49  
50  
51 370 both).

## 54 371 Feasibility and Acceptability

55  
56  
57  
58  
59  
60



1  
2  
3  
4 372 Average scores regarding teachers' acceptability of the training fell below 4 (the 'neutral'  
5  
6  
7 373 value) indicating negative feelings towards the training (supplementary table 3). Teachers  
8  
9  
10 374 reported training activities to be more suited for primary schools and not sufficiently  
11  
12  
13 375 challenging for secondary students. One teacher commented: "*they were more bonus*  
14  
15  
16 376 *activities, like extra treat things... you couldn't get much learning done through them*" (Science  
17  
18  
19 377 teacher, female). Teachers felt it was assumed they weren't delivering PALs prior to the  
20  
21  
22 378 training and this created resistance towards the training effort. Teachers reported that the PAL  
23  
24  
25 379 ideas were not novel and repetitive, the focus on outdoor learning was distracting, and the  
26  
27  
28 380 value of outdoor activities wasn't clear.

31  
32  
33 381 More than half of teachers reported delivering at least one PAL a week at baseline. PAL  
34  
35  
36 382 delivery decreased for four teachers (11%), was maintained by six teachers (17%), and  
37  
38  
39 383 increased for 13 teachers (36%) (excluding P.E. and drama teachers). At follow-up, teachers  
40  
41  
42 384 indicated they were likely to continue teaching PAL, although they reported concerns about  
43  
44  
45 385 students not learning as much during PAL. Some teachers felt older students could be more  
46  
47  
48 386 lethargic and resistant: "*the younger ones love getting up and interacting with each other. I*  
49  
50  
51 387 *think the older ones do, it just takes... more effort to get them going*" (History teacher, female).  
52  
53  
54  
55 388 The majority of teachers reported  $\leq 15$  minutes for planning,  $\leq 5$  minutes for classroom  
56  
57  
58 389 preparation, and  $\leq 5$  minutes for student preparation. The time needed to deliver an outdoor  
59  
60

1  
2  
3  
4 390 activity – in particular the transition between indoors and outdoors - was identified as a barrier  
5  
6  
7 391 to implementation. The assistant head teacher also commented about the pitch of the training  
8  
9  
10 392 and poor use of learning time due to transitioning. They felt the indoor component of the  
11  
12  
13 393 training had been more informative and appropriate, and commented staff had used active  
14  
15  
16 394 learning strategies indoors, but not outdoors. Finally, they commented that PAL  
17  
18  
19 395 implementation had declined with time.

20  
21  
22  
23 396 Of the students who recalled participating in a PAL (58%), >90% wanted teachers to continue  
24  
25  
26 397 teaching PAL, with no evidence of differences in intervention acceptability by sex or weight  
27  
28  
29 398 status. Students commented that PAL were fun and helped learning, and they liked moving  
30  
31  
32  
33 399 more: *"I really enjoyed it. It gave me more of an understanding... because when you're just*  
34  
35  
36 400 *copying off the board some writing I don't always understand it, then when you're moving*  
37  
38  
39 401 *about it's a lot more clearer"* (Year-7, female). Students however also commented that during  
40  
41  
42 402 PAL some students messed around more and didn't focus on work, and work was easier to  
43  
44  
45 403 do when sitting down.

46  
47  
48  
49 404 Student PAL dose

50  
51  
52  
53 405 In one week, 62/175 lessons (35%) to Year 7 and 9 students were active (31 lessons each).  
54  
55  
56 406 Each teacher delivered an average of 2.2 PALs (range = 0-9). Year-7 students received an  
57  
58  
59  
60

1  
2  
3  
4 407 average of 6.9 PAL (range: 5-10; 28% of one week's lessons) and Year-9 students 6.9 (range:  
5  
6  
7 408 2-13; 28%). This represents the contribution across all subjects.  
8  
9

#### 10 409 Costs

11  
12  
13  
14 410 The cost of delivering the training was £901, comprised of £451 staff time and £450  
15  
16  
17 411 equipment. Session one was delivered by three trainers, while session two was delivered by  
18  
19  
20 412 four trainers. Four teachers purchased resources to support PAL delivery, including science  
21  
22  
23 413 equipment, textiles equipment, post-it notes and whiteboard pens, and printed resources. Four  
24  
25  
26  
27 414 students reported purchasing resources to support PAL participation – three purchased sports  
28  
29  
30 415 shoes (~£30 per pair) and one a mouth guard (~£7).  
31  
32  
33

#### 34 416 Preliminary Effectiveness

35  
36  
37  
38 417 Table 3 presents activity intensity during PAL at follow-up and the equivalent lesson at  
39  
40  
41 418 baseline (excluding P.E. and drama lessons). There was no evidence of changes in sedentary  
42  
43  
44 419 activity or time spent in light, moderate and vigorous activity intensities. Table 4 summarises  
45  
46  
47  
48 420 baseline and follow-up values for all outcome measures for intervention and control  
49  
50  
51 421 participants. There was no evidence of preliminary effectiveness on sedentary time or light  
52  
53  
54 422 activity, or on indicators of mental health and wellbeing (including academic efficacy, positive  
55  
56  
57 423 & negative affect, and disruptive behaviour).  
58  
59  
60

## 424 Pilot Study - Reflections

425 Extending the work conducted in the feasibility study, this pilot study demonstrates the  
426 feasibility of whole-school intervention delivery. However, teachers expressed numerous  
427 concerns about the PAL training, including the insufficiently challenging content, lack of  
428 understanding of the value/purpose of the outdoor component, and potential loss of valuable  
429 learning time. These examples are consistent with previous research reporting that time and  
430 standardised testing pressures are barriers to PAL implementation, particularly for secondary  
431 school teachers[14]. The feedback suggests a need to review the content of the training,  
432 particularly the outdoor component.

433 Teachers comments indicated acceptability of delivering PAL and there was a measurable  
434 increase in PAL delivery. Feedback suggests teachers' acceptability may reflect prior  
435 knowledge and experience of PAL. In addition, students reported enjoying PAL. Support for  
436 the intervention by multiple stakeholders is an important facilitator of successful  
437 implementation[43]; as such, the feedback received here is encouraging.

438 Some students reported purchasing sports shoes and mouthguards for PAL; none of the  
439 strategies introduced in the PAL training involved students changing clothing/shoes or using  
440 mouthguards. It is conceivable that when completing the follow-up questionnaire some

1  
2  
3 441 students considered P.E. lessons in their appraisal of PAL and reported shoes and  
4  
5  
6 442 mouthguards purchased for this.  
7  
8  
9

10 443 We successfully tested study procedures and intervention delivery at a whole-school level,  
11  
12  
13 444 with adequate recruitment and retention rates and continued control school involvement  
14  
15  
16 445 indicating acceptability of randomisation. Efforts made to improve data collection processes  
17  
18  
19 446 from the feasibility study, e.g., of student timetables and teacher questionnaires, were  
20  
21  
22  
23 447 successful.  
24  
25  
26

27 448 The assessment of PAL dose showed that students received an average of 6-7 x 60-minute  
28  
29  
30 449 PAL a week, which has the potential to make a valuable contribution to reducing sedentary  
31  
32  
33 450 time among adolescents. Despite a measured increase in PAL delivery, there was no evidence  
34  
35  
36 451 of reduced sedentary time, suggesting a need to review the PAL strategies that were shared  
37  
38  
39 452 with teachers, with a focus on the amount of activity introduced. It is also possible that teachers  
40  
41  
42 453 over-reported PAL delivery out of concern for being judged by the researchers and/or their  
43  
44  
45 454 senior leadership team.  
46  
47  
48  
49

50 455  
51  
52  
53

## 54 456 **OVERALL DISCUSSION**

55  
56  
57  
58  
59  
60

1  
2  
3 457 In this project, we aimed to assess the feasibility, acceptability, preliminary effectiveness and  
4  
5  
6  
7 458 costs of a teacher-training programme for integrating activity into secondary school lessons.  
8  
9  
10 459 We also sought to understand the feasibility and acceptability of study procedures, including  
11  
12  
13 460 repeated accelerometer wear and school-level randomisation. The intervention was delivered  
14  
15  
16 461 in two schools and quantitative and qualitative data were successfully collected from multiple  
17  
18  
19 462 stakeholders, enabling us to address all research questions. The majority of PAL evaluations  
20  
21  
22 463 have been carried out in primary schools[9] and as such, this study makes a valuable  
23  
24  
25  
26 464 contribution to the literature.

#### 29 465 **Feasibility/acceptability of PAL training**

31  
32  
33 466 Consistent with previous research, it was feasible to deliver PAL training to secondary school  
34  
35  
36  
37 467 teachers over two, 2-hour, after-school sessions[50]. Schools scheduled the PAL training  
38  
39  
40 468 during pre-scheduled after-school teacher-training slots, as such, the intervention did not  
41  
42  
43 469 require teachers to attend any more after-school training than they typically would within a  
44  
45  
46 470 school term. In both studies, a small number of teachers were unable to attend both training  
47  
48  
49 471 sessions which may have influenced intervention outcomes. It is realistic that at any school  
50  
51  
52 472 receiving the intervention, a proportion of staff would be unable to attend both training  
53  
54  
55  
56 473 sessions. As such the external validity of the findings is supported.  
57  
58  
59  
60

1  
2  
3  
4 474 While acceptability of the training was demonstrated in the feasibility study and is reported  
5  
6  
7 475 elsewhere[18, 44, 50], feedback from teachers in the pilot study was less positive. Delivery to  
8  
9  
10 476 teachers of two subjects in the feasibility study meant a smaller training group and a smaller  
11  
12  
13 477 trainer:staff ratio than in the pilot study. This allowed more subject-specific discussion and  
14  
15  
16 478 more time to address teachers' personal questions. Teacher feedback suggests that training  
17  
18  
19 479 acceptability is related to teachers' experience delivering PAL. In the pilot study, teachers  
20  
21  
22 480 delivering PAL more regularly rated the intervention more poorly than less experienced  
23  
24  
25 481 teachers. A PAL intervention targeting teachers not regularly delivering PAL may be more  
26  
27  
28 482 acceptable. The positive responses to the training in the feasibility study (involving teachers  
29  
30  
31 483 reporting low levels of PAL delivery) support this suggestion. Teacher's concerns regarding  
32  
33  
34 484 the lack of learning associated with PAL strategies must be an important consideration in the  
35  
36  
37 485 design of future PAL interventions. Student learning is the core focus of schools and  
38  
39  
40 486 implementation of PAL is likely to be contingent on teachers perceiving that PAL supports this  
41  
42  
43 487 goal.

#### 488 **Feasibility/acceptability of delivering/participating in PAL**

489 In the feasibility study, teachers had mixed reviews of delivering PAL, whereas in the pilot  
490 study, teachers reported acceptability of delivering PAL. Pilot study teachers were more likely  
491 to report regular PAL delivery at baseline than feasibility teachers and to have had previous

1  
2  
3 492 exposure to PAL during their initial teacher training and/or career. A longer trial period and  
4  
5  
6 493 increased support may have allowed teachers in the feasibility study to become more  
7  
8  
9 494 confident and accrue more positive PAL experiences. Overall, the data suggest that PAL  
10  
11  
12  
13 495 delivery can be acceptable to secondary school teachers.

14  
15  
16 496 While teachers were the direct intervention recipients and their acceptability is crucial for  
17  
18  
19 497 successful implementation, it is important to consider acceptability for other stakeholders, who  
20  
21  
22 498 also influence implementation. Across both studies students responded positively to PAL, and  
23  
24  
25 499 senior leadership representatives reported satisfaction with the intervention (in the pilot study,  
26  
27  
28 500 satisfaction with the indoor component). Both senior leadership representatives commented  
29  
30  
31 501 that reasons for study participation included the potential positive influence on students'  
32  
33  
34 502 mental health. This observation is consistent with previous findings[7] and indicates potentially  
35  
36  
37 503 effective strategies for promotion of the intervention to schools.  
38  
39  
40

#### 41 42 43 504 **Preliminary Effectiveness**

44  
45  
46 505 Despite a measured increase in PAL delivery, no changes in activity were observed. The  
47  
48  
49 506 findings are consistent with a systematic review and meta-analysis of secondary school  
50  
51  
52 507 classroom-based physical activity interventions, which reported no significant influence on  
53  
54  
55 508 activity behaviours[51]. Although, other PAL feasibility and pilot studies have reported more  
56  
57  
58 509 encouraging changes[42, 51-53]. In the feasibility study, early implementation efforts of Maths  
59  
60



1  
2  
3  
4 510 and English teachers may not have been sufficient to translate to changes in activity. It's  
5  
6  
7 511 possible that more or longer training sessions could increase teacher's confidence and  
8  
9  
10 512 competency for delivering PAL, however, initial discussions with the feasibility study school  
11  
12  
13 513 suggested that a 2-hour after-school training session would be acceptable while a 3-hour  
14  
15  
16 514 session would be too long. Across both studies, teachers were advised that any non-seated  
17  
18  
19 515 activity was considered an 'active lesson' - as such, the intervention may be too dilute for  
20  
21  
22 516 measurable impact using wrist-worn accelerometers; classroom observations of PAL (beyond  
23  
24  
25  
26 517 assessing time on task) may have aided our interpretation of the findings. Overall, the results  
27  
28  
29 518 suggest the need to review the amount of activity the PAL strategies introduce.

30  
31  
32  
33 519 Students received an encouraging dose of PAL (6-7 x 60-minute lessons per week). This dose  
34  
35  
36 520 is consistent with previous studies, for example, 10-30 minutes of activity, daily[42, 53-56] and  
37  
38  
39 521 3 x 60-minute PAL per week[57]. It is worth noting that teachers in the current pilot study chose  
40  
41  
42 522 how many PAL they delivered, rather than being prescribed a weekly target; as such the dose  
43  
44  
45 523 indicates what is naturally achievable by secondary school teachers. A weekly dose of 6-7  
46  
47  
48 524 PAL has the potential to substantially reduce adolescents' sedentary time during school hours,  
49  
50  
51  
52 525 providing sufficient activity is introduced as part of the PAL.

## 56 526 **Costs**

57  
58  
59  
60

1  
2  
3  
4 527 Training delivery costs (independent of travel and planning time) was estimated around £900  
5  
6  
7 528 (\$1,187) in both studies. Strategies to reduce costs could include reducing the number of staff  
8  
9  
10 529 delivering the sessions or hiring staff with a mixture of training levels, rather than the highly  
11  
12  
13 530 experienced staff in the current studies. Approximately 25% of the cost was spent on  
14  
15  
16 531 equipment, primarily for outdoor-based subject-specific examples; reviewing the equipment  
17  
18  
19 532 purchases may identify cost saving opportunities. Research reports that small grants  
20  
21  
22 533 (~\$2,000) to schools can lead to increased implementation of practices to promote activity[58].  
23  
24  
25  
26 534 Senior leadership teams commented on how thinly English schools budgets are stretched; it  
27  
28  
29 535 was suggested that school funds set aside for (for example) mental health services might  
30  
31  
32 536 represent an avenue of funding for the programme for some schools.  
33  
34  
35

### 36 537 **Strengths and Limitations**

37  
38  
39  
40 538 High quality formative work for interventions is necessary to ensure appropriate allocation of  
41  
42  
43 539 research efforts and funding, and the publication of feasibility and pilot research is important  
44  
45  
46 540 to support other researchers and interventionists[59]. Limitations of this work include that  
47  
48  
49 541 samples were predominantly white; consequently, we are unable to explore differential  
50  
51  
52 542 responses to PAL by ethnicity. Moreover, parental opt out consent procedures limited the  
53  
54  
55  
56 543 ability to obtain information on participants' socioeconomic position. The issue of lack of  
57  
58  
59 544 diversity among samples in PAL studies has been previously raised[60]; future research  
60

1  
2  
3 545 should seek to explore feasibility, acceptability and effectiveness among different racial/ethnic  
4  
5  
6 546 and socio-economic groups. Estimated training delivery costs are based on wage rates,  
7  
8  
9  
10 547 national insurance and superannuation costs but don't include overhead costs such as costs  
11  
12  
13 548 of employing individuals and providing building space. As such, training delivery costs may be  
14  
15  
16 549 underestimated. In addition, we did not carry out longer-term follow-up assessments so we do  
17  
18  
19 550 not know if teachers continued to deliver PAL beyond eight weeks after the training. Finally,  
20  
21  
22 551 we do not believe that lack of blinding of measurement staff has impacted the conclusions  
23  
24  
25  
26 552 drawn from these studies, but acknowledge that a potential fully-powered trial would benefit  
27  
28  
29 553 from efforts to blind measurement staff.  
30  
31

## 32 554 **CONCLUSION**

33  
34  
35  
36 555 We successfully demonstrated the feasibility and acceptability of introducing and evaluating a  
37  
38  
39  
40 556 PAL teacher-training programme in secondary schools. Across feasibility and pilot studies,  
41  
42  
43 557 teachers' acceptability of the intervention and of delivering PAL was demonstrated, although  
44  
45  
46 558 aspects of the training programme, particularly the outdoor component, require review. The  
47  
48  
49 559 intervention was acceptable to students and senior leadership representatives, and the dose  
50  
51  
52 560 of PAL received by students was sufficient to have the potential to make a substantial  
53  
54  
55  
56 561 contribution to reducing adolescents' sedentary time during school hours. However, we did  
57  
58  
59 562 not observe preliminary effectiveness on students' activity behaviours or wellbeing indicators.  
60

1  
2  
3  
4  
5  
6  
7  
8  
9  
10  
11  
12  
13  
14  
15  
16  
17  
18  
19  
20  
21  
22  
23  
24  
25  
26  
27  
28  
29  
30  
31  
32  
33  
34  
35  
36  
37  
38  
39  
40  
41  
42  
43  
44  
45  
46  
47  
48  
49  
50  
51  
52  
53  
54  
55  
56  
57  
58  
59  
60

563 Taken together, the findings do not support continuation with the current PAL training  
564 programme, though its acceptability does highlight the need for further research into how the  
565 identified barriers might be overcome.

For peer review only

1  
2  
3 566 **ACKNOWLEDGEMENTS**  
4  
5  
6

7 567 The Creating Active School Environments (CASE) project is a three-year programme of  
8  
9  
10 568 research funded by the Department of Health Policy Research Programme (PR-R5-0213-  
11  
12  
13 569 25001). This report is based on independent research commissioned and funded by the NIHR  
14  
15  
16  
17 570 Policy Research Programme (Opportunities within the school environment to shift the  
18  
19  
20 571 distribution of activity intensity in adolescents; PR-R5-0213-25001). The views expressed in  
21  
22  
23 572 the publication are those of the author(s) and not necessarily those of the NHS, the NIHR, the  
24  
25  
26 573 Department of Health, 'arms' length bodies or other government departments.  
27  
28  
29

30 574 The authors would like to thank the schools, students, teachers, senior leadership  
31  
32  
33 575 representatives and secondary school stakeholders for their participation in, and contributions  
34  
35  
36 576 to, the feasibility and pilot studies. In addition, the authors would like to thank everyone who  
37  
38  
39  
40 577 supported data collection, as well as Colin Farr, Beth Haines and Gwen Brierley for their study  
41  
42  
43 578 co-ordination support, and Antonia Smith and Kate Westgate for their assistance in preparing  
44  
45  
46 579 and processing the accelerometer data.  
47  
48  
49

50 580

51  
52  
53 581 **Data sharing**  
54  
55  
56  
57  
58  
59  
60

1  
2  
3  
4 582 The datasets are not available for download. The study's participant information sheets and  
5  
6  
7 583 ethics applications stipulated that the data would not be shared outside of the research team.  
8  
9  
10 584 The data are held at the MRC Epidemiology Unit at the University of Cambridge.  
11  
12

13 585  
14  
15

16 586 **Competing interests**

17  
18  
19 587 The authors declare that they have no competing interests.  
20  
21  
22

23 588  
24  
25

26 589  
27  
28

29 590  
30  
31

32 591  
33  
34

35 592 **Author contributions**

36  
37  
38 593 All authors (Catherine Gammon, Katie Morton, Andrew Atkin, Kirsten Corder, Andy Daly-  
39  
40  
41

42 594 Smith, Thomas Quarmby, Marc Suhrcke, David Turner and Esther van Sluijs) contributed to  
43  
44  
45 595 the conceptualisation and design of the work, and reviewed and approved the final manuscript.  
46  
47

48 596 Catherine Gammon, David Turner, and Esther van Sluijs contributed to the acquisition,  
49  
50  
51 597 analysis and interpretation of data. Catherine Gammon drafted the manuscript.  
52  
53

54 598  
55  
56  
57  
58  
59  
60

1  
2  
3  
4 599 I, the Submitting Author has the right to grant and does grant on behalf of all authors of the  
5  
6  
7 600 Work (as defined in the below author licence), an exclusive licence and/or a non-exclusive  
8  
9  
10 601 licence for contributions from authors who are: i) UK Crown employees; ii) where BMJ has  
11  
12  
13 602 agreed a CC-BY licence shall apply, and/or iii) in accordance with the terms applicable for US  
14  
15  
16 603 Federal Government officers or employees acting as part of their official duties; on a  
17  
18  
19 604 worldwide, perpetual, irrevocable, royalty-free basis to BMJ Publishing Group Ltd (“BMJ”) its  
20  
21  
22 605 licensees and where the relevant Journal is co-owned by BMJ to the co-owners of the Journal,  
23  
24  
25  
26 606 to publish the Work in BMJ Open and any other BMJ products and to exploit all rights, as set  
27  
28  
29 607 out in our [licence](#).

30  
31  
32  
33 608 The Submitting Author accepts and understands that any supply made under these terms is  
34  
35  
36 609 made by BMJ to the Submitting Author unless you are acting as an employee on behalf of  
37  
38  
39 610 your employer or a postgraduate student of an affiliated institution which is paying any  
40  
41  
42 611 applicable article publishing charge (“APC”) for Open Access articles. Where the Submitting  
43  
44  
45  
46 612 Author wishes to make the Work available on an Open Access basis (and intends to pay the  
47  
48  
49 613 relevant APC), the terms of reuse of such Open Access shall be governed by a Creative  
50  
51  
52 614 Commons licence – details of these licences and which [Creative Commons](#) licence will apply  
53  
54  
55 615 to this Work are set out in our licence referred to above.  
56  
57  
58  
59  
60

## REFERENCES

1. Hallal, P.C., et al., *Global physical activity levels: surveillance progress, pitfalls, and prospects*. The Lancet, 2012. **380**(9838): p. 247-257.
2. Matthews, C.E., et al., *Amount of time spent in sedentary behaviors in the United States, 2003-2004*. Am J Epidemiol, 2008. **167**(7): p. 875-81.
3. Brooke, H.L., et al., *Changes in time-segment specific physical activity between ages 10 and 14 years: A longitudinal observational study*. J Sci Med Sport, 2016. **19**(1): p. 29-34.
4. Steele, R.M., et al., *An investigation of patterns of children's sedentary and vigorous physical activity throughout the week*. Int J Behav Nutr Phys Act, 2010. **7**: p. 88.
5. Morton, K.L., et al., *The school environment and adolescent physical activity and sedentary behaviour: a mixed-studies systematic review*. Obes Rev, 2016. **17**(2): p. 142-58.
6. Morton, K.L., et al., *School policies, programmes and facilities, and objectively measured sedentary time, LPA and MVPA: associations in secondary school and over the transition from primary to secondary school*. Int J Behav Nutr Phys Act, 2016. **13**: p. 54.
7. Morton, K.L., et al., *Engaging stakeholders and target groups in prioritising a public health intervention: the Creating Active School Environments (CASE) online Delphi study*. BMJ Open, 2017. **7**(1): p. e013340.
8. Bartholomew, J.B. and E.M. Jowers, *Physically active academic lessons in elementary children*. Prev Med, 2011. **52 Suppl 1**: p. S51-4.
9. Martin, R. and E.M. Murtagh, *Effect of Active Lessons on Physical Activity, Academic, and Health Outcomes: A Systematic Review*. Res Q Exerc Sport, 2017. **88**(2): p. 149-168.
10. Norris, E., et al., *Physically active lessons as physical activity and educational interventions: a systematic review of methods and results*. Prev Med, 2015. **72**: p. 116-25.
11. Howie, E.K., R.D. Newman-Norlund, and R.R. Pate, *Smiles count but minutes matter: responses to classroom exercise breaks*. Am J Health Behav, 2014. **38**(5): p. 681-9.
12. Daly-Smith, A.J., et al., *Systematic review of acute physically active learning and classroom movement breaks on children's physical activity, cognition, academic performance and classroom behaviour: understanding critical design features*. BMJ Open Sport Exerc Med, 2018. **4**(1): p. e000341.
13. Helgeson, J., *The impact of physical activity on academics in English classes at the junior high school level*. 2013, Northcentral University: ProQuest LLC. p. 188.
14. Cothran, D.J., P.H. Kulinna, and A.C. Garn, *Classroom teachers and physical activity integration*. Teaching and Teacher Education, 2010. **26**(7): p. 1381-1388.
15. Mullender-Wijnsma, M.J., et al., *Improving academic performance of school-age children by physical activity in the classroom: 1-year program evaluation*. J Sch Health, 2015. **85**(6): p. 365-71.
16. Bandura, A., *Social foundations of thought and action: a social-cognitive theory*. 1986, Englewood Cliffs, NJ: Prentice-Hall
17. Abraham, C. and S. Michie, *A taxonomy of behavior change techniques used in interventions*. Health Psychol, 2008. **27**(3): p. 379-87.
18. Gibson, C.A., et al., *Physical activity across the curriculum: year one process evaluation results*. Int J Behav Nutr Phys Act, 2008. **5**: p. 36.
19. Edmundson, E.W., et al., *CATCH: classroom process evaluation in a multicenter trial*. Health Educ Q, 1994. **Suppl 2**: p. S27-s50.
20. Webster, C.A., H. Erwin, and M. Parks, *Relationships Between and Changes in Preservice Classroom Teachers' Efficacy Beliefs, Willingness to Integrate Movement, and Perceived Barriers to Movement Integration*. Physical Educator, 2013. **70**(3): p. 314-335.
21. Brown, H.E., et al., *A cluster randomised controlled trial to evaluate the effectiveness and cost-effectiveness of the GoActive intervention to increase physical activity among adolescents aged 13-14 years*. BMJ Open, 2017. **7**(9): p. e014419.



22. Sudlow, C., et al., *UK biobank: an open access resource for identifying the causes of a wide range of complex diseases of middle and old age*. PLoS Med, 2015. **12**(3): p. e1001779.
23. Phillips, L.R., G. Parfitt, and A.V. Rowlands, *Calibration of the GENEA accelerometer for assessment of physical activity intensity in children*. J Sci Med Sport, 2013. **16**(2): p. 124-8.
24. Rosenberger, M.E., et al., *Estimating activity and sedentary behavior from an accelerometer on the hip or wrist*. Med Sci Sports Exerc, 2013. **45**(5): p. 964-75.
25. Dossegger, A., et al., *Reactivity to accelerometer measurement of children and adolescents*. Med Sci Sports Exerc, 2014. **46**(6): p. 1140-6.
26. Haapala, H.L., et al., *Changes in physical activity and sedentary time in the Finnish Schools on the Move program: a quasi-experimental study*. Scand J Med Sci Sports, 2017. **27**(11): p. 1442-1453.
27. Yli-Piipari, S., et al., *Objectively Measured School Day Physical Activity Among Elementary Students in the United States and Finland*. J Phys Act Health, 2016. **13**(4): p. 440-6.
28. Lau, E.Y., et al., *Changes in Physical Activity in the School, Afterschool, and Evening Periods During the Transition From Elementary to Middle School*. J Sch Health, 2017. **87**(7): p. 531-537.
29. White, T., et al., *Estimation of Physical Activity Energy Expenditure during Free-Living from Wrist Accelerometry in UK Adults*. PLoS One, 2016. **11**(12): p. e0167472.
30. Janssen, I. and A.G. Leblanc, *Systematic review of the health benefits of physical activity and fitness in school-aged children and youth*. Int J Behav Nutr Phys Act, 2010. **7**: p. 40.
31. Thompson, E.R., *Development and Validation of an Internationally Reliable Short-Form of the Positive and Negative Affect Schedule (PANAS)*. Journal of Cross-Cultural Psychology, 2016. **38**(2): p. 227-242.
32. Midgley, C., et al., *Manual for the patterns of adaptive learning scales*. 2000, University of Michigan: Michigan, US.
33. Jones, R.D., *Student engagement. Teacher handbook*. 2009, Center for Leadership in Education: New York.
34. Furber, G. and L. Segal, *The validity of the Child Health Utility instrument (CHU9D) as a routine outcome measure for use in child and adolescent mental health services*. Health Qual Life Outcomes, 2015. **13**: p. 22.
35. Stevens, K., *Developing a descriptive system for a new preference-based measure of health-related quality of life for children*. Qual Life Res, 2009. **18**(8): p. 1105-13.
36. Stevens, K., *Assessing the performance of a new generic measure of health-related quality of life for children and refining it for use in health state valuation*. Appl Health Econ Health Policy, 2011. **9**(3): p. 157-69.
37. Stevens, K., *The Child Health Utility 9D (CHU9D) – A New Paediatric Preference Based Measure of Health Related Quality of Life*, in PRO Newsletter. 2010.
38. Stevens, K.J., *Working with children to develop dimensions for a preference-based, generic, pediatric, health-related quality-of-life measure*. Qual Health Res, 2010. **20**(3): p. 340-51.
39. Stevens, K., *The development of a preference based paediatric health related quality of life measure for use in economic evaluation*. 2008, The University of Sheffield: Sheffield.
40. Hintze, J.M., V.R. J., and E.S. Shapiro, *Best practices in the systematic direct observation of student behaviour*. 2002. **IV**(4): p. 993-1006.
41. Johnson, A.H., S.M. Chafouleas, and A.M. Briesch, *Dependability of data derived from time sampling methods with multiple observation targets*. Sch Psychol Q, 2017. **32**(1): p. 22-34.
42. Mahar, M.T., et al., *Effects of a classroom-based program on physical activity and on-task behavior*. Med Sci Sports Exerc, 2006. **38**(12): p. 2086-94.
43. Nathan, N., et al., *Barriers and facilitators to the implementation of physical activity policies in schools: A systematic review*. Prev Med, 2018. **107**: p. 45-53.
44. Dyrstad, S.M., et al., *Physically active academic lessons: acceptance, barriers and facilitators for implementation*. BMC Public Health, 2018. **18**(1): p. 322.

- 1
- 2
- 3
- 4 45. Atkin, A.J., et al., *Seasonal Variation in Children's Physical Activity and Sedentary Time*. Med Sci Sports Exerc, 2016. **48**(3): p. 449-56.
- 5
- 6 46. Verma, S., et al., *Highs and lows: Naturalistic changes in mood and everyday hassles over school and vacation periods in adolescents*. J Adolesc, 2017. **61**: p. 17-21.
- 7
- 8 47. Eminson, K., et al., *How does age affect the relationship between weight and health utility during the middle years of childhood?* Qual Life Res, 2018.
- 9
- 10 48. Lee, A., *Health-promoting schools: evidence for a holistic approach to promoting health and improving health literacy*. Appl Health Econ Health Policy, 2009. **7**(1): p. 11-7.
- 11
- 12 49. Committee on Physical Activity Physical Education in the School. *Educating the Student Body: Taking Physical Activity and Physical Education to School*, ed. H.W. Kohl, III and H.D. Cook. 2013, Washington (DC): National Academies Press (US).
- 13
- 14
- 15 50. Hankonen, N., et al., *Randomised controlled feasibility study of a school-based multi-level intervention to increase physical activity and decrease sedentary behaviour among vocational school students*. Int J Behav Nutr Phys Act, 2017. **14**(1): p. 37.
- 16
- 17
- 18 51. McMichan, L., A.M. Gibson, and D.A. Rowe, *Classroom-Based Physical Activity and Sedentary Behavior Interventions in Adolescents: A Systematic Review and Meta-Analysis*. J Phys Act Health, 2018. **15**(5): p. 383-393.
- 19
- 20
- 21
- 22 52. Oliver, M., G. Schofield, and E. McEvoy, *An integrated curriculum approach to increasing habitual physical activity in children: a feasibility study*. J Sch Health, 2006. **76**(2): p. 74-9.
- 23
- 24 53. Erwin, H.E., et al., *Promoting children's health through physically active math classes: a pilot study*. Health Promot Pract, 2011. **12**(2): p. 244-51.
- 25
- 26 54. Reznik, M., et al., *A classroom-based physical activity intervention for urban kindergarten and first-grade students: a feasibility study*. Child Obes, 2015. **11**(3): p. 314-24.
- 27
- 28 55. Li, Y.P., et al., *Report on childhood obesity in China (8): effects and sustainability of physical activity intervention on body composition of Chinese youth*. Biomed Environ Sci, 2010. **23**(3): p. 180-7.
- 29
- 30 56. Donnelly, J.E., et al., *Physical Activity Across the Curriculum (PAAC): a randomized controlled trial to promote physical activity and diminish overweight and obesity in elementary school children*. Prev Med, 2009. **49**(4): p. 336-41.
- 31
- 32
- 33 57. Riley, N., et al., *Outcomes and process evaluation of a programme integrating physical activity into the primary school mathematics curriculum: The EASY Minds pilot randomised controlled trial*. J Sci Med Sport, 2015. **18**(6): p. 656-61.
- 34
- 35 58. Miller, G.F., et al., *Evaluation of Let's Move! active schools activation grants*. Prev Med, 2018. **108**: p. 36-40.
- 36
- 37 59. Jago, R. and S.J. Sebire, *Publishing pilot and feasibility evaluations of behavioural interventions: implications for preventive medicine*. Prev Med, 2012. **55**(6): p. 548-9.
- 38
- 39 60. Benjamin Neelon, S.E., K.R. Hesketh, and E.M. van Sluijs, *Will Physically Active Lessons Improve Academic Achievement for All or Widen the Achievement Gap?* Pediatrics, 2016. **137**(3): p. e20154137.
- 40
- 41
- 42
- 43
- 44
- 45
- 46
- 47
- 48
- 49
- 50
- 51
- 52
- 53
- 54
- 55
- 56
- 57
- 58
- 59
- 60

1  
2  
3 **Figure legends:**  
4

5  
6 Figure 1. Logic model of how a PAL intervention may result in changes in student's  
7 sedentary activity (SED).  
8

9  
10 Figure 2. CONSORT flow chart of pilot study participant recruitment (schools and students).  
11  
12  
13  
14  
15  
16  
17  
18  
19  
20  
21  
22  
23  
24  
25  
26  
27  
28  
29  
30  
31  
32  
33  
34  
35  
36  
37  
38  
39  
40  
41  
42  
43  
44  
45  
46  
47  
48  
49  
50  
51  
52  
53  
54  
55  
56  
57  
58  
59  
60

For peer review only

Table 1. Outline of the PAL training programme and timeline of evaluation measures.

|                            | Week 0                                                                                                                                                                                                                                             | Week 1                                                                                                                                                                                                                                                                                                                                                                                   | Week 4                                                                                                                                                                                                                                                                                 | Week 12                                                                                                                                                                                                                                                                                                                                                           |
|----------------------------|----------------------------------------------------------------------------------------------------------------------------------------------------------------------------------------------------------------------------------------------------|------------------------------------------------------------------------------------------------------------------------------------------------------------------------------------------------------------------------------------------------------------------------------------------------------------------------------------------------------------------------------------------|----------------------------------------------------------------------------------------------------------------------------------------------------------------------------------------------------------------------------------------------------------------------------------------|-------------------------------------------------------------------------------------------------------------------------------------------------------------------------------------------------------------------------------------------------------------------------------------------------------------------------------------------------------------------|
|                            | Baseline Measures                                                                                                                                                                                                                                  |                                                                                                                                                                                                                                                                                                                                                                                          |                                                                                                                                                                                                                                                                                        | Follow-Up Measures                                                                                                                                                                                                                                                                                                                                                |
| <b>Feasibility Study</b>   | <b>Students:</b> <ul style="list-style-type: none"> <li>Anthropometry</li> <li>Questionnaire (15 minutes)</li> <li>Accelerometry</li> <li>Time-on-Task</li> </ul> <b>Teachers:</b> <ul style="list-style-type: none"> <li>Questionnaire</li> </ul> | <b>Training session 1 (2 hours)</b><br><b>30 minutes:</b> Introduction to active learning<br><b>40 minutes:</b> Split group in half: <ul style="list-style-type: none"> <li>Half stay in classroom and review classroom-based PAL strategies</li> <li>Half go outside and review outdoor PAL strategies</li> </ul> <b>40 minutes:</b> Groups switch<br><b>10 minutes:</b> Final comments | <b>Training session 2 (2 hours)</b><br><b>30 minutes:</b> Sharing PAL experiences<br><b>30 minutes:</b> Outdoor PAL examples<br><b>15 minutes:</b> Indoor PAL examples<br><b>15 minutes:</b> Discussion of intervention expectations<br><b>10 minutes:</b> Post-training questionnaire | <b>Students:</b> <ul style="list-style-type: none"> <li>Questionnaire (15 minutes)</li> <li>Accelerometry</li> <li>Time-on-Task</li> <li>Focus groups</li> </ul> <b>Teachers:</b> <ul style="list-style-type: none"> <li>Questionnaire</li> <li>Focus group</li> </ul> <b>Senior Leadership Team:</b> <ul style="list-style-type: none"> <li>Interview</li> </ul> |
| <b>Pilot Study:</b>        | <i>Same as for</i>                                                                                                                                                                                                                                 | <i>Same as for feasibility study</i>                                                                                                                                                                                                                                                                                                                                                     | <b>Training session 2 (2 hours)</b>                                                                                                                                                                                                                                                    | <i>Same as for feasibility</i>                                                                                                                                                                                                                                                                                                                                    |
| <b>Intervention School</b> | <i>feasibility study baseline measures</i>                                                                                                                                                                                                         | <i>training session 1</i>                                                                                                                                                                                                                                                                                                                                                                | <b>45 minutes:</b> Split group in half: <ul style="list-style-type: none"> <li>Half review indoor PAL strategies</li> <li>Half review outdoor PAL strategies</li> </ul> <b>45 minutes:</b> Groups switch                                                                               | <i>study follow-up measures</i>                                                                                                                                                                                                                                                                                                                                   |

---

**10 minutes:** Whole-group outdoor activity.  
**10 minutes:** Post-training questionnaire

---

|                     |                          |                     |                     |                                                                                                                    |
|---------------------|--------------------------|---------------------|---------------------|--------------------------------------------------------------------------------------------------------------------|
| <b>Pilot Study:</b> | <i>Same as for</i>       | No training session | No training session | <b>Students:</b>                                                                                                   |
| <b>Control</b>      | <i>feasibility study</i> |                     |                     | <ul style="list-style-type: none"> <li>• Questionnaire</li> <li>• Accelerometry</li> <li>• Time-on-Task</li> </ul> |
| <b>School</b>       | <i>baseline measures</i> |                     |                     |                                                                                                                    |

---

For peer review only

1  
2  
3  
4  
5  
6  
7  
8  
9  
10  
11  
12  
13  
14  
15  
16  
17  
18  
19  
20  
21  
22  
23  
24  
25  
26  
27  
28  
29  
30  
31  
32  
33  
34  
35  
36  
37  
38  
39  
40  
41  
42  
43  
44  
45  
46

**Table 2. Baseline and follow-up values for primary and secondary outcomes; mean (SD).**

|                                    | <b>N</b> | <b>Baseline</b> | <b>Follow-Up</b> | <b>Mean Difference<br/>(95% C.I.)</b> |
|------------------------------------|----------|-----------------|------------------|---------------------------------------|
| Sedentary activity (minutes)       | 76       | 237.4 (26.4)    | 246.1 (27.6)     | 8.7 (3.8,13.7)                        |
| Light activity (minutes)           | 76       | 139.8 (21.8)    | 131.7 (22.6)     | -8.1 (-12.4,-3.8)                     |
| Moderate activity (minutes)        | 76       | 10.8 (6.0)      | 10.3 (5.8)       | -0.6 (-1.4,0.3)                       |
| Vigorous activity (minutes)        | 76       | 2.0 (2.0)       | 1.9 (1.8)        | -0.1 (-0.4,0.3)                       |
| Time-on-task (% intervals on-task) | 11       | 66.1            | -                | -                                     |
| Academic Efficacy (score 1-5)      | 85       | 3.51 (0.80)     | 3.63 (0.83)      | -                                     |
| Disruptive Behaviour (score 1-5)   | 82       | 1.90 (0.95)     | 1.94 (0.98)      | -                                     |
| CHU-9D (score 0.33-1.0)            | 89       | 0.86 (0.10)     | 0.84 (0.10)      | -                                     |
| Positive Affect (score 1-5)        | 81       | 17.35 (3.44)    | 16.16 (3.36)     | -                                     |
| Negative Affect (score 1-5)        | 84       | 10.55 (3.28)    | 10.71 (3.48)     | -                                     |

Length of school day = 390 minutes

**Table 3. Activity intensity during 60-minute PAL at follow-up and the equivalent lesson at baseline (excluding P.E. and drama); mean (SD).**

|                                 | N   | Baseline   | Follow-Up  | Mean<br>Difference (95%<br>C.I.) |
|---------------------------------|-----|------------|------------|----------------------------------|
| Sedentary activity<br>(minutes) | 310 | 41.1 (8.4) | 42.1 (8.6) | 1.0 (-0.1,2.1)                   |
| Light activity (minutes)        | 310 | 17.9 (7.6) | 16.9 (7.8) | -1.1 (-2.1,0)                    |
| Moderate activity<br>(minutes)  | 310 | 0.8 (1.0)  | 0.9 (1.0)  | 0 (-0.1,0.2)                     |
| Vigorous activity (minutes)     | 310 | 0.2 (1.1)  | 0.2 (0.6)  | 0 (-0.1,0.1)                     |

Table 4. Baseline and follow-up values for primary and secondary outcomes; mean (SD).

|                                    | Control School <sup>a</sup> |              |              |                            | Intervention School <sup>a</sup> |              |              |                            |
|------------------------------------|-----------------------------|--------------|--------------|----------------------------|----------------------------------|--------------|--------------|----------------------------|
|                                    | N                           | Baseline     | Follow-Up    | Mean Difference (95% C.I.) | N                                | Baseline     | Follow-Up    | Mean Difference (95% C.I.) |
| Sedentary activity (minutes)       | 74                          | 217.0 (32.4) | 222.1 (36.2) | 5.1 (-1.3,11.5)            | 96                               | 236.4 (31.8) | 237.7 (40.6) | 1.3 (-6.2,8.7)             |
| Light activity (minutes)           | 74                          | 140.5 (26.0) | 136.6 (31.9) | -4.0 (-10.1,2.2)           | 96                               | 129.0 (26.8) | 124.8 (31.2) | -4.2 (-10.5,2.1)           |
| Moderate activity (minutes)        | 74                          | 16.2 (7.5)   | 14.2 (7.8)   | -2.0 (-3.2,-0.8)           | 96                               | 11.1 (6.3)   | 10.1 (6.3)   | -1.1 (-2.0,-0.1)           |
| Vigorous activity (minutes)        | 74                          | 5.5 (3.9)    | 4.7 (3.5)    | -0.8 (-1.4,-0.2)           | 96                               | 3.1 (3.0)    | 3.0 (2.9)    | -0.1 (-0.6,0.4)            |
| Time-on-task (% intervals on-task) | 28 <sup>b</sup>             | 73.7         | 56.6         | -                          | 27 <sup>c</sup>                  | 79.1         | 77.5         | -                          |
| Academic Efficacy (score 1-5)      | 98                          | 3.41 (0.71)  | 3.32 (0.71)  | -                          | 10                               | 3.76 (0.64)  | 3.71 (0.76)  | -                          |
| Disruptive Behaviour (score 1-5)   | 98                          | 2.34 (1.23)  | 2.47 (1.19)  | -                          | 10                               | 1.94 (0.94)  | 2.04 (1.01)  | -                          |
| CHU-9D (score 0.33-1.0)            | 97                          | 0.84 (0.10)  | 0.84 (0.09)  | -                          | 10                               | 0.87 (0.09)  | 0.85 (0.10)  | -                          |
| Positive Affect (score 1-5)        | 98                          | 15.95 (3.33) | 16.08 (3.53) | -                          | 10                               | 17.80 (3.10) | 17.54 (3.74) | -                          |
| Negative Affect (score 1-5)        | 98                          | 10.03 (3.30) | 9.87 (3.14)  | -                          | 10                               | 10.12 (3.47) | 9.95 (3.06)  | -                          |

<sup>a</sup> Length of school day varies: control school = 380 minutes, intervention school = 400 minutes

<sup>b</sup> 14 students observed at baseline across 4 classes (all non-active lessons) and 14 students observed at follow-up across 4 classes (all non-active lessons). Students observed at baseline were different from students observed at follow-up.

<sup>c</sup> 14 students observed at baseline across 4 classes (all non-active lessons) and 13 students observed at follow-up across 4 classes (3 active lessons, 1 non-active lesson). Students observed at baseline were different from students observed at follow-up.



1  
2  
3  
4  
5  
6 Text Box 1.  
7

8 *"I really enjoyed them (active lessons), they (the students) enjoyed them as well, they*  
9 *seemed to get a lot out of them...it was good fun, it was nothing really any different to*  
10 *what I was normally doing, just with a few added extras"* (Maths teacher, female).  
11

12  
13  
14 *"I thought they (the students) would enjoy going outside... I had high hopes for that but it*  
15 *was a Friday afternoon and I don't think they were ready for it... they were causing*  
16 *disruption, they tried to walk off"* (English teacher, female).  
17

18  
19  
20 *"we concentrated more because it was more fun than just sitting around"* (Year-7, male),  
21 and *"when you're sitting down you can get quite bored and get easily distracted whereas*  
22 *if you're moving about you've actually got something to do"* (Year-7, female).  
23  
24  
25

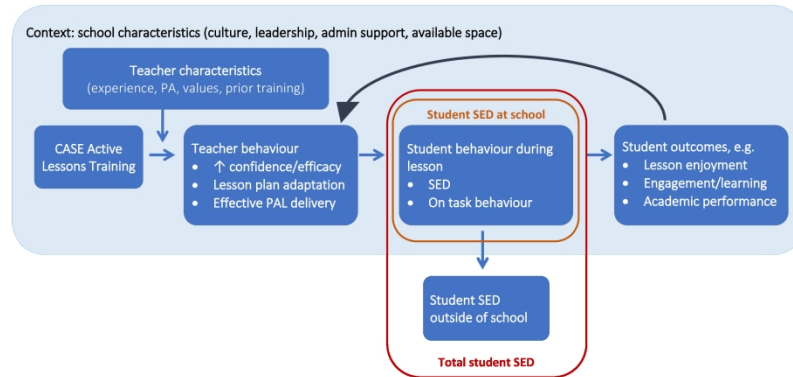

Figure 1. Logic model of how a PAL intervention may result in changes in student's sedentary activity (SED).

297x209mm (300 x 300 DPI)



Figure 2. CONSORT flow chart of pilot study participant recruitment (schools and students).

104x148mm (300 x 300 DPI)

**Supplementary Table 1.** Descriptive, recruitment and retention statistics of student participants in feasibility and pilot studies.

|                                         | Feasibility Study | Pilot Study<br>– Control | Pilot Study<br>– Intervention |
|-----------------------------------------|-------------------|--------------------------|-------------------------------|
| N schools                               | 1                 | 1                        | 1                             |
| N students invited                      | 360               | 200                      | 230                           |
| N parent opt out                        | 25                | 13                       | 19                            |
| N students randomly selected            | 120*              | 130*                     | 130*                          |
| N student non assent                    | 7                 | 5                        | 0                             |
| N student non attendance                | 11                | 17                       | 14                            |
| N students assented                     | 99                | 107                      | 115                           |
| N two time points                       | 91                | 98                       | 107                           |
| N accepted monitor at two time points   | 91                | 93                       | 104                           |
| N with sufficient PA at two time points | 76                | 74                       | 96                            |
| Age (years)                             | 13.0 (1.1)        | 13.1 (0.6)               | 12.7 (1.0)                    |
| Sex: N (% male)                         | 51 (52)           | 53 (50)                  | 58 (50)                       |
| Height (cm)                             | 158.6 (8.7)       | 159.6 (8.9)              | 156.2 (9.8)                   |
| Weight (kg)                             | 51.9 (14.9)       | 54.1 (13.7)              | 48.1 (10.4)                   |
| BMI percentile                          | 56.8 (30.8)       | 63.2 (29.4)              | 57.6 (28.2)                   |
| % overweight/obese                      | 26.6              | 29.0                     | 19.1                          |

PA: physical activity

\*After random selection, a small number of parent opt-out replies were received for students that had been randomly selected for evaluation measures (feasibility study = 3, pilot control school = 1, pilot intervention school = 1), as such, the number of students randomly selected who were eligible to assent were: feasibility study = 117, pilot control school = 129, pilot intervention school = 129.

**Supplementary Table 2.** Descriptive statistics of schools and teacher participants in feasibility and pilot studies.

|                                             | Feasibility Study | Pilot Study – Control | Pilot Study – Intervention |
|---------------------------------------------|-------------------|-----------------------|----------------------------|
| <b>School information</b>                   |                   |                       |                            |
| Students per year group (for years 7, 8, 9) | 180               | 100                   | 115                        |
| Ofsted rating                               | 2 (Good)          | 2 (Good)              | 2 (Good)                   |
| % pupils eligible for free school meals     | 20.5%             | 36.2%                 | 21.4%                      |
| % pupils with special education needs       | 3.6%              | 0.9%                  | 1.9%                       |
| <b>Teacher information</b>                  |                   |                       |                            |
| <b>N teachers invited</b>                   | 15                | 32                    | 36                         |
| <b>N teachers assented</b>                  | 13                | 32                    | 36 <sup>a</sup>            |
| <b>Age Category: N (%)</b>                  |                   |                       |                            |
| 18-24 years                                 | 1 (17)            | 6 (19)                | 1 (3)                      |
| 25-34 years                                 | 2 (33)            | 7 (22)                | 5 (14)                     |
| 35-44 years                                 | 2 (33)            | 9 (28)                | 7 (19)                     |
| 44-45 years                                 | 1 (17)            | 9 (28)                | 11 (31)                    |
| 55-64 years                                 | 0                 | 1 (3)                 | 3 (8)                      |
| 65 years +                                  | 0                 | 0                     | 0                          |
| <b>N (%) male</b>                           | 2 (33)            | 10 (31)               | 10 (28)                    |
| <b>Teaching Experience: N (%)</b>           |                   |                       |                            |
| < 1 year                                    | 1 (17)            | 8 (25)                | 0                          |
| 2-5 years                                   | 2 (33)            | 7 (22)                | 6 (17)                     |
| 6-10 years                                  | 2 (33)            | 5 (16)                | 7 (19)                     |
| >10 years                                   | 0                 | 10 (31)               | 13 (36)                    |
| <b>Current active lesson delivery N (%)</b> |                   |                       |                            |
| Never/rarely                                | 3 (50)            | 5 (16)                | 5 (14)                     |
| 1-2 times / month                           | 2 (33)            | 6 (19)                | 7 (19)                     |
| 1-2 times / week                            | 1 (17)            | 8 (25)                | 5 (14)                     |
| 3-4 times / week                            | 0                 | 6 (19)                | 3 (8)                      |
| > once per day                              | 0                 | 6 (19)                | 6 (17)                     |

<sup>a</sup>27 teachers attended the research team's study introduction and completed baseline questionnaires. A further 9 teachers consented at training session 1 or 2 and did not provide baseline data.

**Supplementary Table 3.** Teacher feedback on the PAL training programme; mean (SD).

|                                                                                                 | Pilot Study – Intervention School |                    |                                              |                                              |
|-------------------------------------------------------------------------------------------------|-----------------------------------|--------------------|----------------------------------------------|----------------------------------------------|
|                                                                                                 | Feasibility Study (n=9)           | Whole Group (n=33) | Baseline PAL delivery < once per week (n=11) | Baseline PAL delivery ≥ once per week (n=14) |
| Usefulness of training in preparing you to deliver PAL<br>(1=not useful, 7=very useful)         | 5.3 (0.5)                         | 3.1 (1.4)          | 3.9 (1.6)                                    | 2.5 (1.1)                                    |
| Appropriateness of depth and scope of training<br>(1=not appropriate, 7=very appropriate)       | 5.2 (0.7)                         | 3.1 (1.4)          | 3.6 (1.6)                                    | 2.7 (1.2)                                    |
| Appropriateness of programme materials and resources<br>(1=not appropriate, 7=very appropriate) | 5.6 (1.3)                         | 2.8 (1.4)          | 3.5 (1.6)                                    | 2.4 (1.2)                                    |
| Clarity of program materials and resources<br>(1=not clear, 7=very clear)                       | 6.0 (0.7)                         | 3.7 (1.2)          | 4.4 (1.3)                                    | 3.4 (1.1)                                    |
| Relevance of training for your lessons<br>(1=not relevant, 7=very relevant)                     | 5.3 (1.1)                         | 2.9 (1.4)          | 3.6 (1.4)                                    | 2.4 (1.4)                                    |
| Would you recommend the training to other teachers?<br>N (%) yes                                | 9 (100)                           | 15 (45)            | 7 (64%)                                      | 4 (29%)                                      |

## Outdoor Active Lesson Examples

1. <https://www.ltl.org.uk/pdf/Natural-Equations-2018-COMLETE1518623029.pdf>
2. <https://www.ltl.org.uk/pdf/Fires-and-Cooking-Activity1421850222.pdf>

## Indoor Active Lesson Examples

### A. Jigsaw

*What is it?* The jigsaw is a cooperative learning strategy (one of several) whereby, as with a jigsaw puzzle, each piece (each student's part) is essential for the complete picture (full understanding of the final product). Here, if each student's part is essential then arguably, each student is essential!

*Implications for classroom layout:* There is minimal impact on classroom layout. Desk should be arranged together so students can sit together in small groups and be able to move between groups.

*How does it work?*

1. Divide students into 5 or 6-person jigsaw groups. Ideally these groups should be diverse in terms of gender, race/ethnicity and ability.
2. These groups are the 'Home teams'. In each home team, each team member should be given a letter (e.g. A, B, C etc.)
3. Team members then join their **Jigsaw team** e.g. all the A's, B's etc. get together. This will require them moving to their jigsaw teams. These jigsaw teams are responsible for discussing and understanding a pre-determined aspect or answering a particular task. For instance, a reading may be divided into several parts with each jigsaw team taking one of those parts.
4. As a teacher, you can move between each jigsaw team to ensure they are addressing the task in its entirety and the whole jigsaw team develops an understanding of it.

- 1  
2  
3 5. Jigsaw teams then return to back to their home teams to discuss what was learnt in the  
4  
5 jigsaw team. **Each student will present her or his segment to the group** so that all learn  
6  
7 from each other.  
8  
9

### 10 *Benefits*

- 13 • Learn a lot of material quickly
- 14
- 15 • Students are held individually accountable for their learning
- 16
- 17 • It helps to maximise student collaboration
- 18
- 19 • Encourages higher order and critical thinking skills.
- 20
- 21
- 22
- 23
- 24
- 25

### 26 B. Active Voting

27  
28 *What is it?* This notion of Active Voting is useful for exploring differing and diverse opinions on  
29 particular issues. It can lead into a specific topic and gauge pupil understanding and critical thought  
30 of the issue in question. It requires pupils to adopt a view on the issue and identify a reason for the  
31 stance they take. Moreover, it will allow everyone to be heard, promoting student voice (even if  
32 they choose not to speak). To facilitate Active Voting, pupils need to be confronted with levels of  
33 ambiguity and grey areas, which helps them to see that opinions often have to be justified with  
34 informed knowledge of the matter under discussion.  
35  
36  
37  
38  
39  
40  
41  
42  
43

44  
45 *Implications for classroom layout:* Each of the four key statements will need to be positioned in one of  
46 corners of a room. These statements include: Strongly agree, agree, disagree, and strongly disagree.  
47  
48 When an issue is raised, pupils will then move to stand/sit in the corner that best reflects their  
49 views and with those who share the same opinion/perspective.  
50  
51  
52

### 53 *How does it work?*

- 54
- 55
- 56
- 57
- 58 1. A range of issues (related to the content being delivered) should be read out in turn by the  
59 teacher.  
60



- 1
- 2
- 3 2. Pupils are then given time to consider their opinion.
- 4
- 5 3. Pupils then move to the corner that best describes how they feel about what was read out.
- 6
- 7 Pupils should be reminded that there are no right or wrong answers.
- 8
- 9
- 10 4. What is read out (e.g. a particular statement) should aim to evoke a range of responses.
- 11
- 12 5. When pupils move to the corner that best represent their views on the statement, they
- 13
- 14 should be encouraged to explain why they feel that way with others in that group. General
- 15
- 16 perspectives can be obtained from all corners.
- 17
- 18 6. Teachers may wish to introduce subsidiary questions to draw out more complex issues and
- 19
- 20 to refine the initial statement/problem/issues being discussed.
- 21
- 22
- 23 7. Pupils are allowed to move during the discussion of each statement if issues arrive that
- 24
- 25 challenge their original opinion.
- 26
- 27
- 28 8. If pupils do switch then they should be encouraged to explain why.
- 29

### 30 *Benefits*

31  
32  
33 Developing thinking and decision making skills  
34  
35  
36  
37  
38  
39  
40  
41  
42  
43  
44  
45  
46  
47  
48  
49  
50  
51  
52  
53  
54  
55  
56  
57  
58  
59  
60

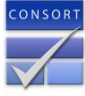

## CONSORT 2010 checklist of information to include when reporting a pilot or feasibility randomized trial in a journal or conference abstract

| Item               | Description                                                                                                 | Reported on line number |
|--------------------|-------------------------------------------------------------------------------------------------------------|-------------------------|
| Title              | Identification of study as randomised pilot or feasibility trial                                            | 1-2                     |
| Authors *          | Contact details for the corresponding author                                                                | 11                      |
| Trial design       | Description of pilot trial design (eg, parallel, cluster)                                                   | 22                      |
| Methods            |                                                                                                             |                         |
| Participants       | Eligibility criteria for participants and the settings where the pilot trial was conducted                  | 21                      |
| Interventions      | Interventions intended for each group                                                                       | 27-30                   |
| Objective          | Specific objectives of the pilot trial                                                                      | 18-20                   |
| Outcome            | Prespecified assessment or measurement to address the pilot trial objectives**                              | 31-34                   |
| Randomization      | How participants were allocated to interventions                                                            | 22                      |
| Blinding (masking) | Whether or not participants, care givers, and those assessing the outcomes were blinded to group assignment | 22-23                   |
| Results            |                                                                                                             |                         |
| Numbers randomized | Number of participants screened and randomised to each group for the pilot trial objectives**               | N/A                     |
| Recruitment        | Trial status†                                                                                               | N/A                     |
| Numbers analysed   | Number of participants analysed in each group for the pilot objectives**                                    | N/A                     |
| Outcome            | Results for the pilot objectives, including any expressions of uncertainty**                                | 35-40                   |
| Harms              | Important adverse events or side effects                                                                    | N/A                     |
| Conclusions        | General interpretation of the results of pilot trial and their implications for the future definitive trial | 41-43                   |
| Trial registration | Registration number for pilot trial and name of trial register                                              | 44                      |
| Funding            | Source of funding for pilot trial                                                                           | 45                      |

Citation: Eldridge SM, Chan CL, Campbell MJ, Bond CM, Hopewell S, Thabane L, et al. CONSORT 2010 statement: extension to randomised pilot and feasibility trials. *BMJ*. 2016;355.

*\*this item is specific to conference abstracts*

*\*\*Space permitting, list all pilot trial objectives and give the results for each. Otherwise, report those that are a priori agreed as the most important to the decision to proceed with the future definitive RCT.*

*†For conference abstracts.*

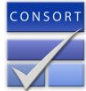

## CONSORT 2010 checklist of information to include when reporting a pilot or feasibility trial\*

| Section/Topic                    | Item No | Checklist item                                                                                                                                                                              | Reported on page No |
|----------------------------------|---------|---------------------------------------------------------------------------------------------------------------------------------------------------------------------------------------------|---------------------|
| <b>Title and abstract</b>        |         |                                                                                                                                                                                             |                     |
|                                  | 1a      | Identification as a pilot or feasibility randomised trial in the title                                                                                                                      | 1                   |
|                                  | 1b      | Structured summary of pilot trial design, methods, results, and conclusions (for specific guidance see CONSORT abstract extension for pilot trials)                                         | 2-3                 |
| <b>Introduction</b>              |         |                                                                                                                                                                                             |                     |
| Background and objectives        | 2a      | Scientific background and explanation of rationale for future definitive trial, and reasons for randomised pilot trial                                                                      | 4-5, 11-12          |
|                                  | 2b      | Specific objectives or research questions for pilot trial                                                                                                                                   | 12                  |
| <b>Methods</b>                   |         |                                                                                                                                                                                             |                     |
| Trial design                     | 3a      | Description of pilot trial design (such as parallel, factorial) including allocation ratio                                                                                                  | 13                  |
|                                  | 3b      | Important changes to methods after pilot trial commencement (such as eligibility criteria), with reasons                                                                                    | 13                  |
| Participants                     | 4a      | Eligibility criteria for participants                                                                                                                                                       | 5-6, 13             |
|                                  | 4b      | Settings and locations where the data were collected                                                                                                                                        | 5, 13               |
|                                  | 4c      | How participants were identified and consented                                                                                                                                              | 6, 13               |
| Interventions                    | 5       | The interventions for each group with sufficient details to allow replication, including how and when they were actually administered                                                       | 30                  |
| Outcomes                         | 6a      | Completely defined prespecified assessments or measurements to address each pilot trial objective specified in 2b, including how and when they were assessed                                | 7-9, 14-15, 30      |
|                                  | 6b      | Any changes to pilot trial assessments or measurements after the pilot trial commenced, with reasons                                                                                        | N/A                 |
|                                  | 6c      | If applicable, prespecified criteria used to judge whether, or how, to proceed with future definitive trial                                                                                 | N/A                 |
| Sample size                      | 7a      | Rationale for numbers in the pilot trial                                                                                                                                                    | 6, 13               |
|                                  | 7b      | When applicable, explanation of any interim analyses and stopping guidelines                                                                                                                | N/A                 |
| Randomisation:                   |         |                                                                                                                                                                                             |                     |
| Sequence generation              | 8a      | Method used to generate the random allocation sequence                                                                                                                                      | 13                  |
|                                  | 8b      | Type of randomisation(s); details of any restriction (such as blocking and block size)                                                                                                      | N/A                 |
| Allocation concealment mechanism | 9       | Mechanism used to implement the random allocation sequence (such as sequentially numbered containers), describing any steps taken to conceal the sequence until interventions were assigned | N/A                 |

|                                                      |     |                                                                                                                                                                                       |                         |
|------------------------------------------------------|-----|---------------------------------------------------------------------------------------------------------------------------------------------------------------------------------------|-------------------------|
| Implementation                                       | 10  | Who generated the random allocation sequence, who enrolled participants, and who assigned participants to interventions                                                               | 13                      |
| Blinding                                             | 11a | If done, who was blinded after assignment to interventions (for example, participants, care providers, those assessing outcomes) and how                                              | 13                      |
|                                                      | 11b | If relevant, description of the similarity of interventions                                                                                                                           | N/A                     |
| Statistical methods                                  | 12  | Methods used to address each pilot trial objective whether qualitative or quantitative                                                                                                | 7-9, 14-15, 30          |
| <b>Results</b>                                       |     |                                                                                                                                                                                       |                         |
| Participant flow (a diagram is strongly recommended) | 13a | For each group, the numbers of participants who were approached and/or assessed for eligibility, randomly assigned, received intended treatment, and were assessed for each objective | 13, Figure 2            |
|                                                      | 13b | For each group, losses and exclusions after randomisation, together with reasons                                                                                                      | Figure 2                |
| Recruitment                                          | 14a | Dates defining the periods of recruitment and follow-up                                                                                                                               | Figure 2                |
|                                                      | 14b | Why the pilot trial ended or was stopped                                                                                                                                              | N/A                     |
| Baseline data                                        | 15  | A table showing baseline demographic and clinical characteristics for each group                                                                                                      | Supp file 1 (pages 1-2) |
| Numbers analysed                                     | 16  | For each objective, number of participants (denominator) included in each analysis. If relevant, these numbers should be by randomised group                                          | 31-33, figure 2         |
| Outcomes and estimation                              | 17  | For each objective, results including expressions of uncertainty (such as 95% confidence interval) for any estimates. If relevant, these results should be by randomised group        | 31-33                   |
| Ancillary analyses                                   | 18  | Results of any other analyses performed that could be used to inform the future definitive trial                                                                                      | N/A                     |
| Harms                                                | 19  | All important harms or unintended effects in each group (for specific guidance see CONSORT for harms)                                                                                 | N/A                     |
|                                                      | 19a | If relevant, other important unintended consequences                                                                                                                                  | N/A                     |
| <b>Discussion</b>                                    |     |                                                                                                                                                                                       |                         |
| Limitations                                          | 20  | Pilot trial limitations, addressing sources of potential bias and remaining uncertainty about feasibility                                                                             | 22                      |
| Generalisability                                     | 21  | Generalisability (applicability) of pilot trial methods and findings to future definitive trial and other studies                                                                     | 22-23                   |
| Interpretation                                       | 22  | Interpretation consistent with pilot trial objectives and findings, balancing potential benefits and harms, and considering other relevant evidence                                   | 19-23                   |
|                                                      | 22a | Implications for progression from pilot to future definitive trial, including any proposed amendments                                                                                 | 22-23                   |
| <b>Other information</b>                             |     |                                                                                                                                                                                       |                         |
| Registration                                         | 23  | Registration number for pilot trial and name of trial registry                                                                                                                        | 5                       |
| Protocol                                             | 24  | Where the pilot trial protocol can be accessed, if available                                                                                                                          | 5                       |
| Funding                                              | 25  | Sources of funding and other support (such as supply of drugs), role of funders                                                                                                       | 3, 24                   |
|                                                      | 26  | Ethical approval or approval by research review committee, confirmed with reference number                                                                                            | 5                       |

1 Citation: Eldridge SM, Chan CL, Campbell MJ, Bond CM, Hopewell S, Thabane L, et al. CONSORT 2010 statement: extension to randomised pilot and feasibility trials. BMJ. 2016;355.  
2  
3 \*We strongly recommend reading this statement in conjunction with the CONSORT 2010, extension to randomised pilot and feasibility trials, Explanation and Elaboration for important  
4 clarifications on all the items. If relevant, we also recommend reading CONSORT extensions for cluster randomised trials, non-inferiority and equivalence trials, non-pharmacological  
5 treatments, herbal interventions, and pragmatic trials. Additional extensions are forthcoming: for those and for up to date references relevant to this checklist, see [www.consort-statement.org](http://www.consort-statement.org).  
6  
7  
8  
9  
10  
11  
12  
13  
14  
15  
16  
17  
18  
19  
20  
21  
22  
23  
24  
25  
26  
27  
28  
29  
30  
31  
32  
33  
34  
35  
36  
37  
38  
39  
40  
41  
42

For peer review only
